# Supplementary material
Source: PubMed Central journal article supplement (PMC5697905)

**Table of Contents:**

|                                                   |       |
|---------------------------------------------------|-------|
| General Procedures.....                           | SI-2  |
| Figure SI-1. List of terretonin meroterpenes..... | SI-3  |
| Synthesis Scheme 1.....                           | SI-3  |
| Ketone <b>21</b> .....                            | SI-4  |
| Ketone <b>22</b> .....                            | SI-4  |
| Andrastin D ( <b>4</b> ).....                     | SI-5  |
| Ketone <b>23</b> .....                            | SI-5  |
| Preterrenoid ( <b>7</b> ).....                    | SI-6  |
| Terrenoid ( <b>9</b> ).....                       | SI-7  |
| Terretonin L ( <b>10</b> ).....                   | SI-7  |
| Diester <b>28</b> .....                           | SI-7  |
| X-Ray crystallography data.....                   | SI-9  |
| Computational Section.....                        | SI-36 |
| NMR Spectra.....                                  | SI-89 |

## General Synthetic Procedures

Unless stated otherwise, all reactions were performed in flame-dried glassware under an atmosphere of nitrogen or argon. Dry tetrahydrofuran (THF), dichloromethane, diethyl ether, toluene, dimethylformamide (DMF), and hexane were obtained by passing these previously degassed solvents through activated alumina columns. When mentioned, further solvent degassing was performed by bubbling a stream of argon through the solvent in an ultrasound bath for a period of approximately ten minutes. Anhydrous DMSO was purchased from Aldrich stored over molecular sieves and used as received. Compound **20** was prepared according to the procedure of Ting, Xu, Zeng, and Maimone (*JACS*, **2016**, *138*, 14868). All other reagents were used as received, unless stated otherwise. Reactions were monitored by thin layer chromatography (TLC) on Silicycle Siliaplate™ glass backed TLC plates (250 μm thickness, 60 Å porosity, F-254 indicator) and visualized by UV irradiation or development with anisaldehyde or phosphomolybdic/cerium sulfate stain. Volatile solvents were removed under reduced pressure with a rotary evaporator. All flash column chromatography was performed using Silicycle SiliaFlash® F60, 230-400 mesh silica gel (40-63 μm). <sup>1</sup>H NMR and <sup>13</sup>C NMR spectra were recorded with Bruker AV, AVQ, and DRX spectrometers operating at 300, 400, 500, 600, or 900 MHz for <sup>1</sup>H (75, 100, 125, 150, 225 MHz for <sup>13</sup>C) in CDCl<sub>3</sub>, benzene-*d*<sub>6</sub>, CD<sub>2</sub>Cl<sub>2</sub>, CD<sub>3</sub>OD, or acetone-*d*<sub>6</sub>. Chemical shifts are reported relative to the residual solvent signal (<sup>1</sup>H NMR: δ = 7.26 (CDCl<sub>3</sub>); <sup>13</sup>C NMR: δ = 77.16 (CDCl<sub>3</sub>)). NMR data are reported as follows: chemical shift (multiplicity, coupling constants where applicable, number of hydrogens). Splitting is reported with the following symbols: s = singlet, bs = broad singlet, d = doublet, t = triplet, app t = apparent triplet, dd = doublet of doublets, ddd = doublet of doublet of doublets, dt = doublet of triplets, hept = heptet, m = multiplet. IR spectra were taken on a Nicolet 380 spectrometer as thin films and are reported in frequency of absorption (cm<sup>-1</sup>). Only selected resonances are reported. High-resolution mass spectra (HRMS) were obtained by the mass spectral facility at the University of California, Berkeley using a Finnigan LTQFT mass spectrometer (Thermo electron corporation).

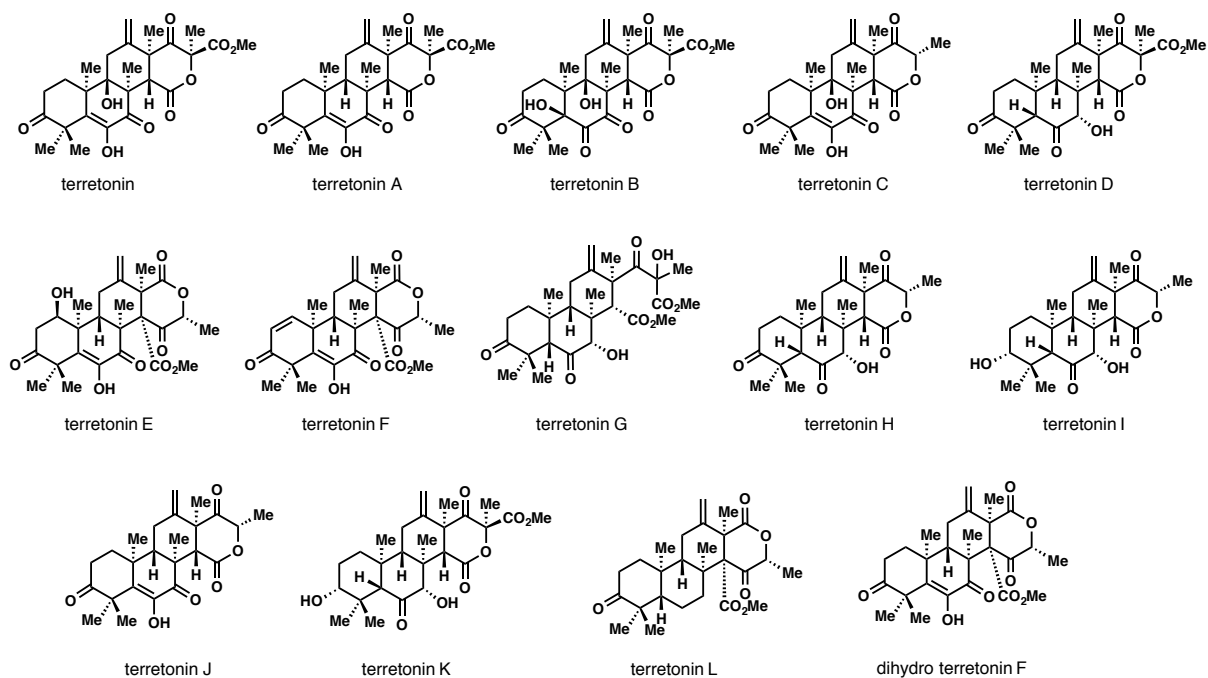

**Figure SI-1.** List of terretinin meroterpenes

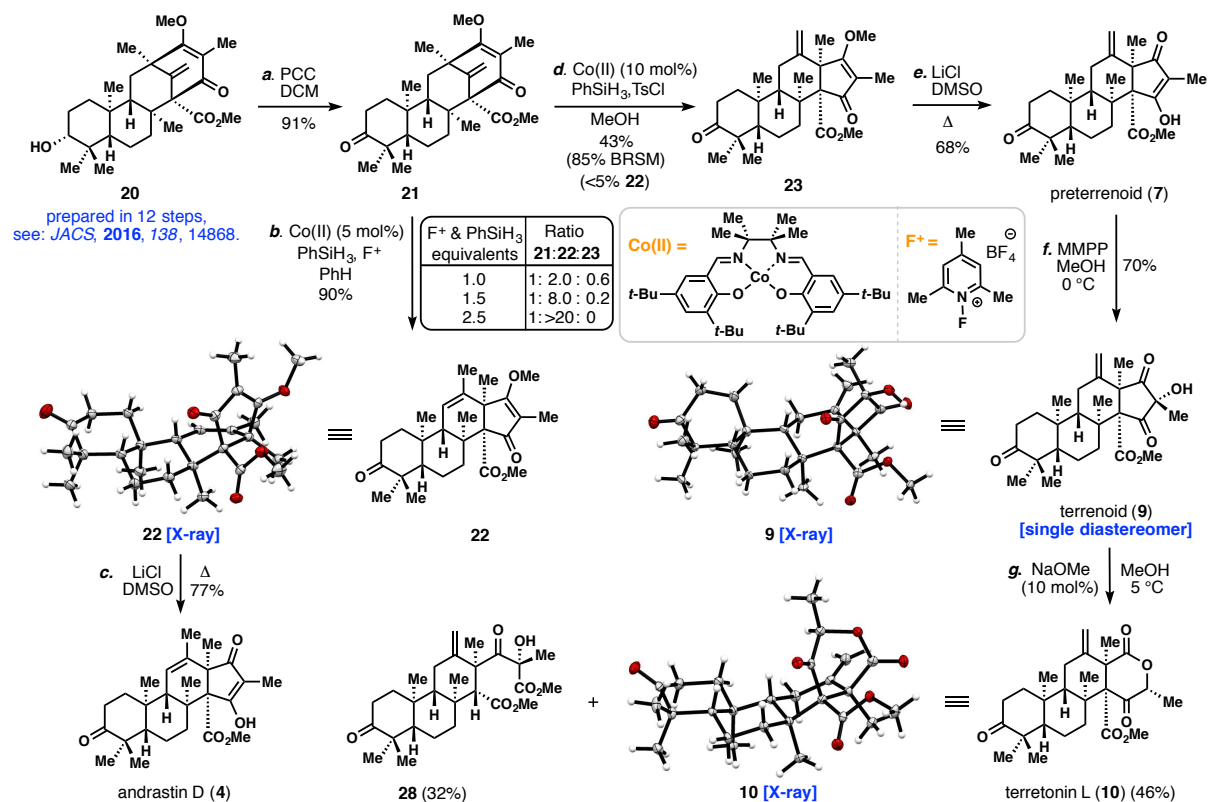

**Scheme 1.** Total syntheses of andrastin D (4), preterrenoid (7), terrenoid (9), and terretinin L (10).

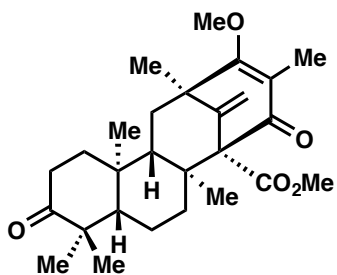

**Ketone 21.** To a solution of alcohol **20** (60.0 mg, 0.14 mmol, 1.0 equiv) in DCM (4.0 mL) was added pyridinium chlorochromate (116 mg, 0.54 mmol, 3.8 equiv) at room temperature. The reaction mixture was stirred for 2 hours at room temperature, filtered through a short pad of celite, and concentrated *in vacuo*. The crude product was purified by silica gel column chromatography (EtOAc/hexane = 1:5) affording ketone **21** (54.4 mg, 91% yield) as a white solid: (mp = 210-212 °C); <sup>1</sup>H NMR (600 MHz, CDCl<sub>3</sub>) δ 5.05 (s, 1H), 4.47 (s, 1H), 3.89 (s, 3H), 3.64 (s, 3H), 2.47-2.38 (m, 2H), 2.32 (dt, *J* = 13.6, 3.4 Hz, 1H), 1.91 (s, 3H), 1.83 (ddd, *J* = 12.7, 7.6, 4.9 Hz, 1H), 1.73-1.66 (m, 1H), 1.60-1.50 (m, 3H), 1.45 (t, *J* = 13.0 Hz, 1H), 1.40 (s, 3H), 1.36 (dd, *J* = 11.0, 4.2 Hz, 1H), 1.25-1.19 (m, 1H), 1.17 (s, 3H), 1.12 (dd, *J* = 12.6, 3.5 Hz, 1H), 1.05 (s, 3H), 1.02 (s, 3H), 0.95 (s, 3H); <sup>13</sup>C NMR (150 MHz, CDCl<sub>3</sub>) δ 217.30, 197.14, 175.20, 170.61, 149.14, 120.93, 108.01, 73.24, 61.93, 54.39, 51.55, 50.88, 47.34, 45.17, 42.75, 39.45, 37.19, 33.95, 33.87, 31.98, 27.01, 21.20, 21.03, 19.95, 17.23, 15.79, 10.43; IR (neat) 2978, 2953, 2865, 1733, 1705, 1659, 1623, 1459, 1434, 1387, 1326, 1304, 1217, 1191, 1159, 1106, 905, 751 cm<sup>-1</sup>; HRMS (EI) calcd. for [C<sub>27</sub>H<sub>38</sub>O<sub>5</sub>]: *m/z* 442.2719, found 442.2719.

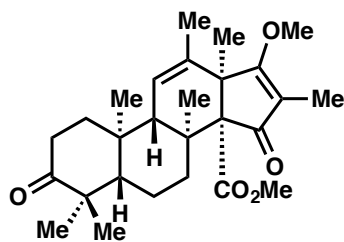

**Ketone 22.** A 15 mL flame-dried reaction tube was charged with ketone **21** (50 mg, 0.11 mmol, 1.0 equiv), Co(II) complex (3.5 mg, 5 mol %) and *N*-fluoro-2,4,6-trimethylpyridinium tetrafluoroborate (64.1 mg, 0.28 mmol, 2.5 equiv). The reaction vessel was evacuated and backfilled with nitrogen and this process was repeated twice. Degassed benzene (3.0 mL) was added, followed by a solution of phenylsilane (10% in degassed benzene, 0.35 mL, 2.5 equiv.) under nitrogen. The resulting mixture was stirred at room temperature for two hours at which point the reaction mixture was concentrated *in vacuo* and the crude material purified by silica gel column chromatography (EtOAc/hexanes = 1:5) affording **22** (45.1 mg, 90%) as a colorless solid: (mp = 174-176 °C); <sup>1</sup>H NMR (600 MHz, CDCl<sub>3</sub>) δ 5.32 (s, 1H), 4.12 (s, 3H), 3.59 (s, 3H), 3.06 (td, *J* = 13.1, 4.4 Hz, 1H), 2.51 (ddd, *J* = 15.8, 10.8, 7.2 Hz, 1H), 2.37 (ddd, *J* = 15.8, 7.0, 3.9 Hz, 1H), 1.98-1.87 (m, 5H), 1.90 (s, 3H), 1.86-1.83 (m, 1H), 1.65-1.56 (m, 1H), 1.55-1.50 (m, 1H), 1.48 (dd, *J* = 12.3, 2.6 Hz, 1H); 1.38-1.32 (m, 1H), 1.31 (s, 3H), 1.25 (s, 3H), 1.08 (s, 3H), 1.02 (s, 3H), 0.98 (s, 3H); <sup>13</sup>C NMR (150 MHz, CDCl<sub>3</sub>) δ 217.50, 204.52, 184.40, 170.57, 138.28, 124.97, 110.60, 69.79, 59.49, 53.49, 52.84, 51.86, 51.74,

47.57, 42.89, 38.57, 36.60, 33.96, 31.71, 26.33, 21.24, 21.02, 19.01, 17.50, 16.78, 16.58, 8.75; IR (neat) 2953, 2920, 2851, 1736, 1702, 1627, 1453, 1382, 1310, 1263, 1204, 1151, 1135, 1031, 979  $\text{cm}^{-1}$ ; HRMS (EI) calcd. for  $[\text{C}_{27}\text{H}_{38}\text{O}_5]$ :  $m/z$  442.2719, found 442.2726.

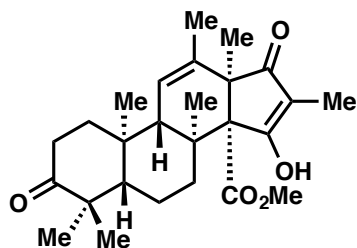

**Andrastin D (4).** [Note: Solvents used were degassed with argon for 10 minutes prior to use]. A 10 mL flame-dried reaction tube was charged with ketone **22** (11.7 mg, 0.026 mmol, 1 equiv) and dry lithium chloride (44.8 mg, 1.06 mmol, 40 equiv). The reaction vessel was evacuated and backfilled with nitrogen and this process

was repeated twice. DMSO (1.0 mL) was added and the mixture heated to 120 °C for 2 hours. The reaction mixture was then cooled to room temperature, diluted with saturated aq.  $\text{NH}_4\text{Cl}$  solution (5 mL), and extracted with diethyl ether (3 x 2 mL). The combined organic layers extracts were washed with  $\text{H}_2\text{O}$  (3 x 1 mL), brine (1 mL), dried over  $\text{MgSO}_4$ , and concentrated *in vacuo*. The crude residue was purified by column chromatography (EtOAc/hexanes = 2:3) to afford andrastin D (**4**) (8.6 mg, 77% yield) as a colorless solid:  $^1\text{H}$  NMR (600 MHz,  $\text{CD}_3\text{OD}$ )  $\delta$  5.43 (s, 1H), 3.57 (s, 3H), 2.80 (td,  $J = 13.2, 4.2$  Hz, 1H),  $\delta$  2.64 (ddd,  $J = 16.0, 11.5, 7.0$  Hz, 1H), 2.35 (ddd,  $J = 16.0, 6.5, 3.6$  Hz, 1H), 2.14 (dt,  $J = 13.4, 3.4$  Hz, 1H), 2.07 (ddd,  $J = 13.3, 7.1, 3.6$  Hz, 1H), 1.81 (s, 4H), 1.71 (qd,  $J = 13.3, 3.8$  Hz, 1H), 1.60-1.50 (m, 1H), 1.57 (s, 3H), 1.46 (dd,  $J = 12.3, 2.5$  Hz, 1H), 1.38-1.26 (m, 1H), 1.34 (s, 3H), 1.20 (s, 3H), 1.09 (s, 3H), 1.07 (s, 3H), 1.06 (s, 3H);  $^{13}\text{C}$  NMR (150 MHz,  $\text{CD}_3\text{OD}$ )  $\delta$  219.71, 201.29\*, 188.16\*, 172.05, 137.04, 125.65, 114.50, 68.99, 58.08, 55.64, 54.02, 52.01, 48.57, 43.16, 39.92, 37.74, 34.88, 33.64, 26.57, 21.56, 20.18, 19.87, 18.03, 16.73, 16.21, 6.32; IR (neat) 2951, 2934, 2875, 1737, 1701, 1617, 1454, 1383, 1323, 1210, 1137, 1112, 1029, 1002, 736  $\text{cm}^{-1}$ ; HRMS (EI) calcd. for  $[\text{C}_{26}\text{H}_{36}\text{O}_5]$ :  $m/z$  428.2563, found 428.2565. [Note: Carbons with an asterisk were identified in the HMBC spectrum]

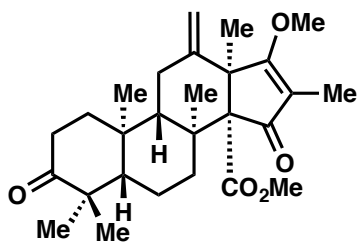

**Ketone 23.** A 10 mL flame-dried reaction tube was charged with ketone **21** (10.2 mg, 0.023 mmol, 1.0 equiv), Co(II) complex (1.4 mg, 10 mol%) and additional Schiff base ligand (6.3 mg, 0.5 equiv). The reaction vessel was evacuated and backfilled with nitrogen (a total of three times) and degassed MeOH (1.0 mL) was

added followed by a solution of phenylsilane (0.14 mL, 5% (v/v) solution in degassed benzene, 2.5 equiv.). A solution of TsCl (6.6 mg, 0.035 mmol, 1.5 equiv) in degassed benzene (0.1 mL) was then added dropwise over 20 min at rt under argon. After 3 hours of stirring, the solvent was evaporated and the residue purified by preparative thin layer chromatography (EtOAc/hexanes = 2:3) to afford recovered **21** (5.0 mg) and ketone **23** (4.4 mg, 43% yield) as colorless solid: (mp = 193-195 °C);  $^1\text{H}$  NMR (600 MHz,  $\text{CDCl}_3$ )  $\delta$  5.09-5.04 (m, 2H),  $\delta$  4.07 (s, 3H), 3.61 (s, 3H), 2.80 (td,  $J$  = 13.0, 4.4 Hz, 1H), 2.49 (ddd,  $J$  = 16.0, 11.0, 7.3 Hz, 1H), 2.33 (ddd,  $J$  = 15.9, 6.9, 3.7 Hz, 1H), 2.30-2.19 (m, 2H), 1.97 (s, 3H), 1.77-1.70 (m, 2H), 1.57-1.38 (m, 4H), 1.36 (s, 3H), 1.34-1.27 (m, 1H), 1.33 (s, 3H), 1.07 (s, 3H), 1.04 (s, 3H), 1.02 (s, 3H);  $^{13}\text{C}$  NMR (100 MHz,  $\text{CDCl}_3$ )  $\delta$  217.43, 204.37, 182.30, 170.64, 148.19, 113.13, 112.72, 70.20, 59.85, 54.13, 53.13, 51.52, 48.92, 47.57, 43.30, 38.25, 37.86, 33.86, 33.26, 29.79, 26.44, 21.41, 19.23, 19.18, 19.12, 15.03, 8.71; IR (neat) 2950, 2849, 1735, 1702, 1627, 1457, 1382, 1308, 1258, 1200, 1155, 1114, 1038, 983, 768, 736  $\text{cm}^{-1}$ ; HRMS (EI) calcd. for  $[\text{C}_{27}\text{H}_{38}\text{O}_5]$ :  $m/z$  442.2719, found 442.2722.

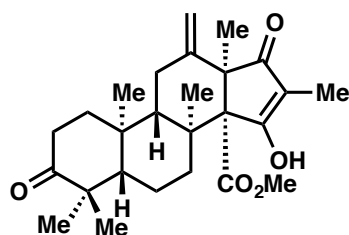

**Preterrenoid (7).** [Note: Solvents used were degassed with argon for 10 minutes prior to use]. A 10 mL flame-dried reaction tube was charged with ketone **23** (11.1 mg, 0.025 mmol, 1 equiv) and dry lithium chloride (42.4 mg, 1.0 mmol, 40 equiv). The reaction vessel was evacuated and backfilled with nitrogen and this process repeated twice. DMSO (1.0 mL) was added and the reaction mixture heated to 120 °C and kept at this temperature for 1.5 h. The reaction mixture was then cooled to room temperature, diluted with sat.  $\text{NH}_4\text{Cl}$  solution, and extracted with diethyl ether (3 x 2 mL). The combined organic layers extracts were washed with  $\text{H}_2\text{O}$  (3 x 1 mL), washed with brine (1 mL), dried over  $\text{MgSO}_4$ , and concentrated *in vacuo*. The crude residue was purified by preparative thin layer chromatography (EtOAc/hexanes = 2:1) to afford preterrenoid (**7**) (7.3 mg, 68% yield) as a foam:  $^1\text{H}$  NMR (600 MHz,  $\text{CDCl}_3$ )  $\delta$  9.66 (s, 1H), 5.20 (s, 1H), 5.14 (d,  $J$  = 2.9 Hz, 1H), 3.80 (s, 3H), 2.52-2.33 (m, 3H), 2.26 (dd,  $J$  = 16.6, 11.9 Hz, 1H), 1.88-1.70 (m, 2H), 1.75 (s, 3H), 1.54-1.46 (m, 2H), 1.45-1.33 (m, 3H), 1.32 (s, 3H), 1.24-1.18 (m, 1H), 1.07 (s, 3H), 1.04 (s, 3H), 1.02 (s, 3H), 0.97 (s, 3H);  $^{13}\text{C}$  NMR (151 MHz,  $\text{CDCl}_3$ )  $\delta$  216.97, 205.28, 177.36, 175.33, 143.56, 113.84, 113.09, 68.09, 57.77, 55.15, 52.02, 47.22, 44.73, 44.65, 39.26, 38.04, 37.97, 33.87, 28.84, 27.16, 23.66, 21.63, 19.97, 19.53, 15.91, 6.15; IR (neat) 3214, 2951, 2936, 2873, 1738, 1704,

1632, 1458, 1390, 1345, 1316, 1223, 1202, 1144, 1112, 1034, 1003, 920, 735  $\text{cm}^{-1}$ ; HRMS (EI) calcd. for  $[\text{C}_{26}\text{H}_{36}\text{O}_5]$ :  $m/z$  428.2563, found 428.2565.

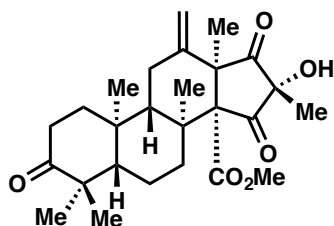

Terrenoid (**9**). [Note: Solvents used were degassed with argon for 10 minutes prior to use.] To a solution of preterrenoid (**7**) (17.6 mg, 0.041 mmol) in a mixture of methanol (1.2 mL) and dichloromethane (0.4 mL) was added a solution of magnesium monoperoxyphthalate (80% purity, 50.7 mg, 0.082 mmol, 2 equiv) in MeOH (0.36 mL) dropwise at 0 °C. The solution was stirred at the same temperature for 2 h, and after evaporation of most of the solvent at 0 °C, the residue was diluted with a mixture of saturated aqueous  $\text{Na}_2\text{S}_2\text{O}_3$  (0.5 mL) and saturated aqueous  $\text{NaHCO}_3$  (1.0 mL), and extracted with ethyl acetate (3 x 2 mL). The combined organic layers extracts were washed with brine (1 mL), dried over  $\text{MgSO}_4$ , and concentrated *in vacuo*. The crude residue was purified by preparative thin layer chromatography (diethyl ether/hexanes = 2:1) to afford terrenoid (**9**) (12.7 mg, 70% yield) as a colorless solid: (mp = 194-196 °C);  $^1\text{H}$  NMR (900 MHz,  $\text{CDCl}_3$ )  $\delta$  5.07 (dd,  $J$  = 2.6, 1.1 Hz, 1H), 4.91 (d,  $J$  = 2.7 Hz, 1H), 3.65 (s, 3H), 2.94 (td,  $J$  = 12.7, 5.2 Hz, 1H), 2.65-2.60 (m, 2H), 2.50 (ddd,  $J$  = 15.8, 9.8, 7.5 Hz, 1H), 2.45 (ddd,  $J$  = 15.8, 7.6, 4.5 Hz, 1H), 2.38 (dd,  $J$  = 16.4, 3.9 Hz, 1H), 2.15 (dt,  $J$  = 13.6, 3.3 Hz, 1H), 1.95 (ddd,  $J$  = 13.1, 7.5, 4.5 Hz, 1H), 1.61-1.51 (m, 3H), 1.53 (s, 3H), 1.44-1.40 (m, 1H), 1.39 (s, 3H), 1.38 (s, 3H), 1.30 (dd,  $J$  = 13.8, 3.9 Hz, 1H), 1.13 (s, 3H), 1.06 (s, 3H), 1.02 (s, 3H);  $^{13}\text{C}$  NMR (225 MHz,  $\text{CDCl}_3$ )  $\delta$  217.13, 211.27, 210.14, 168.77, 143.76, 116.55, 75.37, 73.77, 57.60, 53.59, 52.58, 50.46, 47.38, 40.60, 39.24, 37.15, 33.92, 32.94, 28.24, 26.93, 25.84, 23.78, 21.40, 19.08, 18.05, 15.74; IR (neat) 3457, 2953, 2874, 1754, 1729, 1704, 1459, 1389, 1077, 920  $\text{cm}^{-1}$ ; HRMS (ESI) calcd. for  $[\text{C}_{26}\text{H}_{36}\text{O}_6\text{Na}]^+$  ( $\text{M}+\text{Na}$ ) $^+$ :  $m/z$  467.2404, found 467.2412.

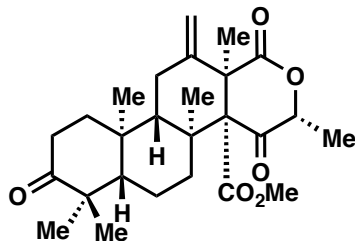

Terretonin L (**10**). To a solution of terrenoid (**9**) (3.5 mg, 0.0079 mmol) in dry methanol (0.4 mL) was added a solution of NaOMe (0.043 mg, 0.00080 mmol, 0.1 equiv) in MeOH (0.02 mL) dropwise at 0 °C. The solution was then stirred at 5 °C for 24 h. The reaction mixture was quenched with saturated aq.  $\text{NH}_4\text{Cl}$  solution (1.0 mL) and extracted with diethyl ether (3 x 2 mL). The

combined organic layers extracts were washed with brine (1 mL), dried over MgSO<sub>4</sub>, and concentrated *in vacuo*. The crude residue was purified by preparative thin layer chromatography (diethyl ether/DCM = 1:20) to afford terretonin L (**10**) (1.6 mg, 46% yield) and diester **24** (1.2 mg, 32% yield). **Terretonin L (10)**: <sup>1</sup>H NMR (500 MHz, CDCl<sub>3</sub>) δ 5.04 (d, *J* = 2.3 Hz, 1H), 5.01 (q, *J* = 6.5 Hz, 1H), 4.98 (d, *J* = 2.3 Hz, 1H), 3.64 (s, 3H), 2.69-2.60 (m, 1H), 2.55-2.40 (m, 3H), 2.21 (td, *J* = 12.7, 4.1 Hz, 1H), 2.09 (dt, *J* = 13.7, 3.4 Hz, 1H), 2.02-1.94 (m, 1H), 1.68 (s, 3H), 1.65-1.51 (m, 2H), 1.47 (s, 3H), 1.44-1.38 (m, 1H), 1.41 (d, *J* = 6.4 Hz, 3H), 1.35 (dd, *J* = 12.1, 2.9 Hz, 1H), 1.20 (dd, *J* = 13.6, 3.3 Hz, 1H), 1.09 (s, 3H), 1.05 (s, 3H), 1.00 (s, 3H); <sup>13</sup>C NMR (225 MHz, CDCl<sub>3</sub>) δ 216.89, 203.11, 172.07, 167.61, 145.37, 113.05, 77.36, 69.06, 54.42, 54.03, 52.48, 51.64, 47.36, 43.63, 39.24, 37.55, 33.86, 33.69, 28.75, 26.88, 25.47, 21.29, 19.81, 19.22, 15.86, 15.44; IR (neat) 2953, 2924, 2872, 1753, 1723, 1704, 1454, 1391, 1229, 1211, 1177, 1156, 1118, 1064, 1034, 918 cm<sup>-1</sup>; HRMS (EI) calcd. for [C<sub>26</sub>H<sub>36</sub>O<sub>6</sub>]: *m/z* 444.2512, found 444.2505. **Diester 28**: <sup>1</sup>H NMR (600 MHz, CDCl<sub>3</sub>) δ 4.77 (s, 1H), 4.24 (d, *J* = 2.3 Hz, 1H), 3.82 (s, 3H), 3.56 (s, 3H), 3.42 (s, 1H), 2.57-2.41 (m, 4H), 1.98 (ddd, *J* = 12.5, 7.5, 4.4 Hz, 1H), 1.95-1.90 (m, 1H), 1.70 (s, 3H), 1.63-1.46 (m, 5H), 1.33-1.18 (m, 2H), 1.32 (s, 3H), 1.29 (s, 3H), 1.09 (s, 3H), 1.05 (s, 3H), 0.98 (s, 3H); <sup>13</sup>C NMR (150 MHz, CDCl<sub>3</sub>) δ 217.30, 207.31, 174.47, 171.75, 148.46, 111.43, 82.45, 57.48, 55.12, 54.87, 54.20, 53.62, 50.85, 47.43, 40.30, 38.98, 37.21, 36.72, 34.01, 27.89, 26.98, 26.82, 24.81, 21.29, 19.12, 15.53, 15.52; IR (neat) 3472, 2951, 2931, 2852, 1738, 1711, 1451, 1383, 1264, 1193, 1171, 1131, 1007 cm<sup>-1</sup>; HRMS (ESI) calcd. for [C<sub>27</sub>H<sub>40</sub>O<sub>7</sub> Na]<sup>+</sup> (M+Na): *m/z* 499.2666, found 499.2677.

#### X-Ray Crystallography Data



Table 1. Crystal data and structure refinement for ketone **22**

|                                   |                                                |          |
|-----------------------------------|------------------------------------------------|----------|
| X-ray ID                          | ketone <b>22</b>                               |          |
| Sample/notebook ID                | XG-II-75-1                                     |          |
| Empirical formula                 | C <sub>27</sub> H <sub>38</sub> O <sub>5</sub> |          |
| Formula weight                    | 442.57                                         |          |
| Temperature                       | 100(2) K                                       |          |
| Wavelength                        | 0.71073 Å                                      |          |
| Crystal system                    | Orthorhombic                                   |          |
| Space group                       | P n a 21                                       |          |
| Unit cell dimensions              | a = 14.7846(7) Å                               | α = 90°. |
|                                   | b = 12.5507(5) Å                               | β = 90°. |
|                                   | c = 13.1718(6) Å                               | γ = 90°. |
| Volume                            | 2444.12(19) Å <sup>3</sup>                     |          |
| Z                                 | 4                                              |          |
| Density (calculated)              | 1.203 Mg/m <sup>3</sup>                        |          |
| Absorption coefficient            | 0.081 mm <sup>-1</sup>                         |          |
| F(000)                            | 960                                            |          |
| Crystal size                      | 0.070 x 0.050 x 0.050 mm <sup>3</sup>          |          |
| Theta range for data collection   | 2.129 to 25.369°.                              |          |
| Index ranges                      | -17<=h<=17, -15<=k<=15, -15<=l<=15             |          |
| Reflections collected             | 57579                                          |          |
| Independent reflections           | 4465 [R(int) = 0.0382]                         |          |
| Completeness to theta = 25.000°   | 100.0 %                                        |          |
| Absorption correction             | Semi-empirical from equivalents                |          |
| Max. and min. transmission        | 0.928 and 0.898                                |          |
| Refinement method                 | Full-matrix least-squares on F <sup>2</sup>    |          |
| Data / restraints / parameters    | 4465 / 1 / 298                                 |          |
| Goodness-of-fit on F <sup>2</sup> | 1.057                                          |          |
| Final R indices [I>2sigma(I)]     | R1 = 0.0356, wR2 = 0.0863                      |          |
| R indices (all data)              | R1 = 0.0405, wR2 = 0.0894                      |          |
| Absolute structure parameter      | 0.0(2)                                         |          |
| Extinction coefficient            | n/a                                            |          |
| Largest diff. peak and hole       | 0.201 and -0.182 e.Å <sup>-3</sup>             |          |

Table 2. Atomic coordinates ( $\times 10^4$ ) and equivalent isotropic displacement parameters ( $\text{\AA}^2 \times 10^3$ ) for ketone **22**.  $U(\text{eq})$  is defined as one third of the trace of the orthogonalized  $U^{ij}$  tensor.

|       | x       | y       | z       | $U(\text{eq})$ |
|-------|---------|---------|---------|----------------|
| C(1)  | 6326(2) | 5325(2) | 4640(2) | 19(1)          |
| C(2)  | 7014(2) | 5093(2) | 5511(2) | 20(1)          |
| C(3)  | 7016(2) | 5948(2) | 6242(2) | 23(1)          |
| C(4)  | 6387(2) | 6663(2) | 5950(2) | 21(1)          |
| C(5)  | 5779(2) | 6301(2) | 5080(2) | 19(1)          |
| C(6)  | 4891(2) | 5945(2) | 5599(2) | 19(1)          |
| C(7)  | 4713(2) | 4927(2) | 5777(2) | 20(1)          |
| C(8)  | 5283(2) | 4016(2) | 5400(2) | 18(1)          |
| C(9)  | 4806(2) | 2907(2) | 5462(2) | 20(1)          |
| C(10) | 4646(2) | 2669(2) | 6596(2) | 22(1)          |
| C(11) | 4325(2) | 1524(2) | 6781(2) | 23(1)          |
| C(12) | 4944(2) | 702(2)  | 6334(2) | 24(1)          |
| C(13) | 5297(2) | 876(2)  | 5252(2) | 23(1)          |
| C(14) | 5505(2) | 2082(2) | 5069(2) | 21(1)          |
| C(15) | 5780(2) | 2340(2) | 3976(2) | 24(1)          |
| C(16) | 6276(2) | 3403(2) | 3927(2) | 22(1)          |
| C(17) | 5715(2) | 4338(2) | 4363(2) | 18(1)          |
| C(18) | 6912(2) | 5680(2) | 3729(2) | 21(1)          |
| C(19) | 8151(2) | 6725(3) | 3219(2) | 36(1)          |
| C(20) | 7668(2) | 5904(2) | 7113(2) | 33(1)          |
| C(21) | 6717(2) | 8128(2) | 7071(2) | 28(1)          |
| C(22) | 5604(2) | 7202(2) | 4314(2) | 23(1)          |
| C(23) | 4246(2) | 6804(2) | 5947(2) | 25(1)          |
| C(24) | 3886(2) | 2908(2) | 4908(2) | 25(1)          |
| C(25) | 6177(2) | 232(2)  | 5126(2) | 31(1)          |
| C(26) | 4583(2) | 406(2)  | 4526(2) | 28(1)          |
| C(27) | 4999(2) | 4652(2) | 3560(2) | 22(1)          |
| O(1)  | 6818(1) | 5419(1) | 2859(1) | 26(1)          |
| O(2)  | 7576(1) | 6344(2) | 4031(1) | 27(1)          |
| O(3)  | 7509(1) | 4310(1) | 5542(2) | 26(1)          |
| O(4)  | 6170(1) | 7627(1) | 6309(1) | 26(1)          |

O(5)

5133(2)

-96(2)

6810(2)

40(1)

---

Table 3. Bond lengths [Å] and angles [°] for ketone **22**

|              |          |              |          |
|--------------|----------|--------------|----------|
| C(1)-C(18)   | 1.545(3) | C(14)-H(14)  | 1.0000   |
| C(1)-C(2)    | 1.561(3) | C(15)-C(16)  | 1.524(4) |
| C(1)-C(17)   | 1.575(3) | C(15)-H(15A) | 0.9900   |
| C(1)-C(5)    | 1.578(3) | C(15)-H(15B) | 0.9900   |
| C(2)-O(3)    | 1.226(3) | C(16)-C(17)  | 1.547(3) |
| C(2)-C(3)    | 1.443(4) | C(16)-H(16A) | 0.9900   |
| C(3)-C(4)    | 1.348(4) | C(16)-H(16B) | 0.9900   |
| C(3)-C(20)   | 1.499(4) | C(17)-C(27)  | 1.548(3) |
| C(4)-O(4)    | 1.339(3) | C(18)-O(1)   | 1.201(3) |
| C(4)-C(5)    | 1.526(3) | C(18)-O(2)   | 1.347(3) |
| C(5)-C(22)   | 1.537(3) | C(19)-O(2)   | 1.448(3) |
| C(5)-C(6)    | 1.546(3) | C(19)-H(19A) | 0.9800   |
| C(6)-C(7)    | 1.325(4) | C(19)-H(19B) | 0.9800   |
| C(6)-C(23)   | 1.511(3) | C(19)-H(19C) | 0.9800   |
| C(7)-C(8)    | 1.505(3) | C(20)-H(20A) | 0.9800   |
| C(7)-H(7)    | 0.9500   | C(20)-H(20B) | 0.9800   |
| C(8)-C(17)   | 1.562(3) | C(20)-H(20C) | 0.9800   |
| C(8)-C(9)    | 1.563(3) | C(21)-O(4)   | 1.434(3) |
| C(8)-H(8)    | 1.0000   | C(21)-H(21A) | 0.9800   |
| C(9)-C(10)   | 1.542(3) | C(21)-H(21B) | 0.9800   |
| C(9)-C(24)   | 1.544(3) | C(21)-H(21C) | 0.9800   |
| C(9)-C(14)   | 1.552(3) | C(22)-H(22A) | 0.9800   |
| C(10)-C(11)  | 1.533(3) | C(22)-H(22B) | 0.9800   |
| C(10)-H(10A) | 0.9900   | C(22)-H(22C) | 0.9800   |
| C(10)-H(10B) | 0.9900   | C(23)-H(23A) | 0.9800   |
| C(11)-C(12)  | 1.500(4) | C(23)-H(23B) | 0.9800   |
| C(11)-H(11A) | 0.9900   | C(23)-H(23C) | 0.9800   |
| C(11)-H(11B) | 0.9900   | C(24)-H(24A) | 0.9800   |
| C(12)-O(5)   | 1.215(3) | C(24)-H(24B) | 0.9800   |
| C(12)-C(13)  | 1.533(4) | C(24)-H(24C) | 0.9800   |
| C(13)-C(25)  | 1.541(4) | C(25)-H(25A) | 0.9800   |
| C(13)-C(26)  | 1.541(4) | C(25)-H(25B) | 0.9800   |
| C(13)-C(14)  | 1.564(3) | C(25)-H(25C) | 0.9800   |
| C(14)-C(15)  | 1.531(4) | C(26)-H(26A) | 0.9800   |

|                  |            |                     |            |
|------------------|------------|---------------------|------------|
| C(26)-H(26B)     | 0.9800     | C(27)-H(27B)        | 0.9800     |
| C(26)-H(26C)     | 0.9800     | C(27)-H(27C)        | 0.9800     |
| C(27)-H(27A)     | 0.9800     |                     |            |
| C(18)-C(1)-C(2)  | 104.96(18) | C(9)-C(8)-H(8)      | 105.2      |
| C(18)-C(1)-C(17) | 111.6(2)   | C(10)-C(9)-C(24)    | 108.8(2)   |
| C(2)-C(1)-C(17)  | 113.39(19) | C(10)-C(9)-C(14)    | 107.3(2)   |
| C(18)-C(1)-C(5)  | 110.43(19) | C(24)-C(9)-C(14)    | 115.5(2)   |
| C(2)-C(1)-C(5)   | 102.04(19) | C(10)-C(9)-C(8)     | 106.97(19) |
| C(17)-C(1)-C(5)  | 113.68(18) | C(24)-C(9)-C(8)     | 111.9(2)   |
| O(3)-C(2)-C(3)   | 125.0(2)   | C(14)-C(9)-C(8)     | 106.02(18) |
| O(3)-C(2)-C(1)   | 124.3(2)   | C(11)-C(10)-C(9)    | 112.5(2)   |
| C(3)-C(2)-C(1)   | 110.7(2)   | C(11)-C(10)-H(10A)  | 109.1      |
| C(4)-C(3)-C(2)   | 107.6(2)   | C(9)-C(10)-H(10A)   | 109.1      |
| C(4)-C(3)-C(20)  | 133.3(2)   | C(11)-C(10)-H(10B)  | 109.1      |
| C(2)-C(3)-C(20)  | 119.0(2)   | C(9)-C(10)-H(10B)   | 109.1      |
| O(4)-C(4)-C(3)   | 131.8(2)   | H(10A)-C(10)-H(10B) | 107.8      |
| O(4)-C(4)-C(5)   | 113.1(2)   | C(12)-C(11)-C(10)   | 113.2(2)   |
| C(3)-C(4)-C(5)   | 115.0(2)   | C(12)-C(11)-H(11A)  | 108.9      |
| C(4)-C(5)-C(22)  | 111.9(2)   | C(10)-C(11)-H(11A)  | 108.9      |
| C(4)-C(5)-C(6)   | 104.75(19) | C(12)-C(11)-H(11B)  | 108.9      |
| C(22)-C(5)-C(6)  | 111.11(19) | C(10)-C(11)-H(11B)  | 108.9      |
| C(4)-C(5)-C(1)   | 101.84(19) | H(11A)-C(11)-H(11B) | 107.8      |
| C(22)-C(5)-C(1)  | 114.6(2)   | O(5)-C(12)-C(11)    | 120.4(3)   |
| C(6)-C(5)-C(1)   | 111.91(19) | O(5)-C(12)-C(13)    | 121.3(2)   |
| C(7)-C(6)-C(23)  | 120.6(2)   | C(11)-C(12)-C(13)   | 118.3(2)   |
| C(7)-C(6)-C(5)   | 121.7(2)   | C(12)-C(13)-C(25)   | 108.2(2)   |
| C(23)-C(6)-C(5)  | 117.6(2)   | C(12)-C(13)-C(26)   | 106.8(2)   |
| C(6)-C(7)-C(8)   | 124.3(2)   | C(25)-C(13)-C(26)   | 108.1(2)   |
| C(6)-C(7)-H(7)   | 117.9      | C(12)-C(13)-C(14)   | 110.4(2)   |
| C(8)-C(7)-H(7)   | 117.9      | C(25)-C(13)-C(14)   | 108.9(2)   |
| C(7)-C(8)-C(17)  | 108.7(2)   | C(26)-C(13)-C(14)   | 114.2(2)   |
| C(7)-C(8)-C(9)   | 114.00(19) | C(15)-C(14)-C(9)    | 110.4(2)   |
| C(17)-C(8)-C(9)  | 117.43(19) | C(15)-C(14)-C(13)   | 113.7(2)   |
| C(7)-C(8)-H(8)   | 105.2      | C(9)-C(14)-C(13)    | 117.6(2)   |
| C(17)-C(8)-H(8)  | 105.2      | C(15)-C(14)-H(14)   | 104.5      |

|                     |            |                     |       |
|---------------------|------------|---------------------|-------|
| C(9)-C(14)-H(14)    | 104.5      | O(4)-C(21)-H(21B)   | 109.5 |
| C(13)-C(14)-H(14)   | 104.5      | H(21A)-C(21)-H(21B) | 109.5 |
| C(16)-C(15)-C(14)   | 110.6(2)   | O(4)-C(21)-H(21C)   | 109.5 |
| C(16)-C(15)-H(15A)  | 109.5      | H(21A)-C(21)-H(21C) | 109.5 |
| C(14)-C(15)-H(15A)  | 109.5      | H(21B)-C(21)-H(21C) | 109.5 |
| C(16)-C(15)-H(15B)  | 109.5      | C(5)-C(22)-H(22A)   | 109.5 |
| C(14)-C(15)-H(15B)  | 109.5      | C(5)-C(22)-H(22B)   | 109.5 |
| H(15A)-C(15)-H(15B) | 108.1      | H(22A)-C(22)-H(22B) | 109.5 |
| C(15)-C(16)-C(17)   | 112.97(19) | C(5)-C(22)-H(22C)   | 109.5 |
| C(15)-C(16)-H(16A)  | 109.0      | H(22A)-C(22)-H(22C) | 109.5 |
| C(17)-C(16)-H(16A)  | 109.0      | H(22B)-C(22)-H(22C) | 109.5 |
| C(15)-C(16)-H(16B)  | 109.0      | C(6)-C(23)-H(23A)   | 109.5 |
| C(17)-C(16)-H(16B)  | 109.0      | C(6)-C(23)-H(23B)   | 109.5 |
| H(16A)-C(16)-H(16B) | 107.8      | H(23A)-C(23)-H(23B) | 109.5 |
| C(16)-C(17)-C(27)   | 107.84(19) | C(6)-C(23)-H(23C)   | 109.5 |
| C(16)-C(17)-C(8)    | 110.32(19) | H(23A)-C(23)-H(23C) | 109.5 |
| C(27)-C(17)-C(8)    | 112.59(19) | H(23B)-C(23)-H(23C) | 109.5 |
| C(16)-C(17)-C(1)    | 112.01(18) | C(9)-C(24)-H(24A)   | 109.5 |
| C(27)-C(17)-C(1)    | 110.5(2)   | C(9)-C(24)-H(24B)   | 109.5 |
| C(8)-C(17)-C(1)     | 103.62(18) | H(24A)-C(24)-H(24B) | 109.5 |
| O(1)-C(18)-O(2)     | 122.3(2)   | C(9)-C(24)-H(24C)   | 109.5 |
| O(1)-C(18)-C(1)     | 126.7(2)   | H(24A)-C(24)-H(24C) | 109.5 |
| O(2)-C(18)-C(1)     | 111.0(2)   | H(24B)-C(24)-H(24C) | 109.5 |
| O(2)-C(19)-H(19A)   | 109.5      | C(13)-C(25)-H(25A)  | 109.5 |
| O(2)-C(19)-H(19B)   | 109.5      | C(13)-C(25)-H(25B)  | 109.5 |
| H(19A)-C(19)-H(19B) | 109.5      | H(25A)-C(25)-H(25B) | 109.5 |
| O(2)-C(19)-H(19C)   | 109.5      | C(13)-C(25)-H(25C)  | 109.5 |
| H(19A)-C(19)-H(19C) | 109.5      | H(25A)-C(25)-H(25C) | 109.5 |
| H(19B)-C(19)-H(19C) | 109.5      | H(25B)-C(25)-H(25C) | 109.5 |
| C(3)-C(20)-H(20A)   | 109.5      | C(13)-C(26)-H(26A)  | 109.5 |
| C(3)-C(20)-H(20B)   | 109.5      | C(13)-C(26)-H(26B)  | 109.5 |
| H(20A)-C(20)-H(20B) | 109.5      | H(26A)-C(26)-H(26B) | 109.5 |
| C(3)-C(20)-H(20C)   | 109.5      | C(13)-C(26)-H(26C)  | 109.5 |
| H(20A)-C(20)-H(20C) | 109.5      | H(26A)-C(26)-H(26C) | 109.5 |
| H(20B)-C(20)-H(20C) | 109.5      | H(26B)-C(26)-H(26C) | 109.5 |
| O(4)-C(21)-H(21A)   | 109.5      | C(17)-C(27)-H(27A)  | 109.5 |

|                     |            |
|---------------------|------------|
| C(17)-C(27)-H(27B)  | 109.5      |
| H(27A)-C(27)-H(27B) | 109.5      |
| C(17)-C(27)-H(27C)  | 109.5      |
| H(27A)-C(27)-H(27C) | 109.5      |
| H(27B)-C(27)-H(27C) | 109.5      |
| C(18)-O(2)-C(19)    | 114.5(2)   |
| C(4)-O(4)-C(21)     | 120.51(19) |

Symmetry transformations used to generate equivalent atoms:

Table 4. Anisotropic displacement parameters ( $\text{\AA}^2 \times 10^3$ ) for ketone **22**. The anisotropic displacement factor exponent takes the form:  $-2\pi^2 [h^2 a^{*2} U^{11} + \dots + 2 h k a^* b^* U^{12}]$

|       | $U^{11}$ | $U^{22}$ | $U^{33}$ | $U^{23}$ | $U^{13}$ | $U^{12}$ |
|-------|----------|----------|----------|----------|----------|----------|
| C(1)  | 18(1)    | 20(1)    | 17(1)    | 1(1)     | 2(1)     | 0(1)     |
| C(2)  | 15(1)    | 24(1)    | 20(1)    | 3(1)     | 2(1)     | -1(1)    |
| C(3)  | 21(1)    | 25(1)    | 22(1)    | 1(1)     | -2(1)    | 1(1)     |
| C(4)  | 23(1)    | 20(1)    | 19(1)    | 2(1)     | 2(1)     | -4(1)    |
| C(5)  | 20(1)    | 19(1)    | 18(1)    | 1(1)     | 0(1)     | 2(1)     |
| C(6)  | 18(1)    | 24(1)    | 16(1)    | -1(1)    | -2(1)    | 4(1)     |
| C(7)  | 18(1)    | 27(1)    | 15(1)    | -3(1)    | 0(1)     | -1(1)    |
| C(8)  | 19(1)    | 21(1)    | 15(1)    | -2(1)    | 1(1)     | 0(1)     |
| C(9)  | 21(1)    | 22(1)    | 17(1)    | -2(1)    | 1(1)     | -1(1)    |
| C(10) | 24(1)    | 21(1)    | 20(1)    | -3(1)    | 1(1)     | -2(1)    |
| C(11) | 26(1)    | 23(1)    | 19(1)    | 0(1)     | 1(1)     | -5(1)    |
| C(12) | 28(1)    | 23(1)    | 21(1)    | 0(1)     | -4(1)    | -4(1)    |
| C(13) | 28(1)    | 20(1)    | 22(1)    | -2(1)    | 2(1)     | -2(1)    |
| C(14) | 24(1)    | 21(1)    | 19(1)    | -2(1)    | 0(1)     | -1(1)    |
| C(15) | 28(1)    | 23(1)    | 21(1)    | -2(1)    | 8(1)     | 1(1)     |
| C(16) | 24(1)    | 23(1)    | 20(1)    | -2(1)    | 4(1)     | 1(1)     |
| C(17) | 19(1)    | 21(1)    | 15(1)    | -1(1)    | 2(1)     | 0(1)     |
| C(18) | 19(1)    | 22(1)    | 22(1)    | 3(1)     | 0(1)     | 3(1)     |
| C(19) | 30(2)    | 46(2)    | 31(2)    | 8(1)     | 6(1)     | -13(1)   |
| C(20) | 33(2)    | 39(2)    | 28(2)    | -3(1)    | -11(1)   | 5(1)     |
| C(21) | 31(2)    | 31(2)    | 23(1)    | -7(1)    | -2(1)    | -2(1)    |
| C(22) | 25(1)    | 23(1)    | 22(1)    | 2(1)     | -1(1)    | 3(1)     |
| C(23) | 24(1)    | 27(1)    | 25(1)    | -1(1)    | 2(1)     | 5(1)     |
| C(24) | 24(1)    | 28(1)    | 22(1)    | -4(1)    | -2(1)    | -4(1)    |
| C(25) | 33(2)    | 24(1)    | 35(2)    | -1(1)    | 4(1)     | 3(1)     |
| C(26) | 38(2)    | 25(1)    | 23(1)    | -7(1)    | 1(1)     | -6(1)    |
| C(27) | 22(1)    | 25(1)    | 19(1)    | -1(1)    | 0(1)     | 1(1)     |
| O(1)  | 27(1)    | 32(1)    | 18(1)    | 0(1)     | 2(1)     | -3(1)    |



|      |       |       |       |       |       |       |
|------|-------|-------|-------|-------|-------|-------|
| O(2) | 24(1) | 35(1) | 23(1) | 1(1)  | 3(1)  | -8(1) |
| O(3) | 23(1) | 26(1) | 29(1) | -1(1) | -3(1) | 6(1)  |
| O(4) | 28(1) | 22(1) | 27(1) | -7(1) | -6(1) | 0(1)  |
| O(5) | 56(1) | 34(1) | 31(1) | 10(1) | 10(1) | 11(1) |

---

Table 5. Hydrogen coordinates ( $\times 10^4$ ) and isotropic displacement parameters ( $\text{\AA}^2 \times 10^3$ ) for ketone **22**.

|        | x    | y    | z    | U(eq) |
|--------|------|------|------|-------|
| H(7)   | 4191 | 4762 | 6167 | 24    |
| H(8)   | 5801 | 3970 | 5887 | 22    |
| H(10A) | 5215 | 2790 | 6974 | 26    |
| H(10B) | 4187 | 3171 | 6864 | 26    |
| H(11A) | 4275 | 1402 | 7521 | 27    |
| H(11B) | 3714 | 1436 | 6483 | 27    |
| H(14)  | 6062 | 2223 | 5478 | 26    |
| H(15A) | 6177 | 1769 | 3712 | 29    |
| H(15B) | 5233 | 2372 | 3543 | 29    |
| H(16A) | 6430 | 3561 | 3211 | 27    |
| H(16B) | 6849 | 3345 | 4312 | 27    |
| H(19A) | 8462 | 6120 | 2903 | 54    |
| H(19B) | 8600 | 7222 | 3496 | 54    |
| H(19C) | 7782 | 7091 | 2709 | 54    |
| H(20A) | 8192 | 6355 | 6963 | 50    |
| H(20B) | 7868 | 5167 | 7215 | 50    |
| H(20C) | 7370 | 6161 | 7730 | 50    |
| H(21A) | 6669 | 7727 | 7707 | 43    |
| H(21B) | 6506 | 8859 | 7180 | 43    |
| H(21C) | 7349 | 8139 | 6847 | 43    |
| H(22A) | 5301 | 7795 | 4657 | 35    |
| H(22B) | 5219 | 6936 | 3764 | 35    |
| H(22C) | 6181 | 7447 | 4033 | 35    |
| H(23A) | 3960 | 7135 | 5355 | 38    |
| H(23B) | 4580 | 7345 | 6330 | 38    |
| H(23C) | 3780 | 6489 | 6382 | 38    |
| H(24A) | 3985 | 2847 | 4175 | 37    |
| H(24B) | 3565 | 3573 | 5055 | 37    |
| H(24C) | 3522 | 2303 | 5143 | 37    |
| H(25A) | 6640 | 515  | 5585 | 46    |

|        |      |      |      |    |
|--------|------|------|------|----|
| H(25B) | 6389 | 289  | 4423 | 46 |
| H(25C) | 6062 | -518 | 5289 | 46 |
| H(26A) | 4773 | 523  | 3822 | 43 |
| H(26B) | 4000 | 757  | 4643 | 43 |
| H(26C) | 4521 | -360 | 4652 | 43 |
| H(27A) | 5286 | 5077 | 3025 | 33 |
| H(27B) | 4520 | 5072 | 3884 | 33 |
| H(27C) | 4737 | 4006 | 3262 | 33 |

---

Table 6. Crystal data and structure refinement for terretonin L (**10**)

|                        |                                                |                             |  |
|------------------------|------------------------------------------------|-----------------------------|--|
| Identification code    | terretonin L                                   |                             |  |
| Empirical formula      | C <sub>26</sub> H <sub>36</sub> O <sub>6</sub> |                             |  |
| Formula weight         | 444.55                                         |                             |  |
| Temperature            | 100(2) K                                       |                             |  |
| Wavelength             | 1.54178 $\approx$                              |                             |  |
| Crystal system         | Monoclinic                                     |                             |  |
| Space group            | P 2 <sub>1</sub> /n                            |                             |  |
| Unit cell dimensions   | $a = 9.7395(8) \approx$                        | $\alpha = 90^\circ$ .       |  |
|                        | $b = 23.1865(18) \approx$                      | $\beta = 99.380(3)^\circ$ . |  |
|                        | $c = 9.9111(8) \approx$                        | $\gamma = 90^\circ$ .       |  |
| Volume                 | 2208.2(3) $\approx^3$                          |                             |  |
| Z                      | 4                                              |                             |  |
| Density (calculated)   | 1.337 Mg/m <sup>3</sup>                        |                             |  |
| Absorption coefficient | 0.758 mm <sup>-1</sup>                         |                             |  |
| F(000)                 | 960                                            |                             |  |

|                                   |                                             |
|-----------------------------------|---------------------------------------------|
| Crystal size                      | 0.100 x 0.100 x 0.080 mm <sup>3</sup>       |
| Theta range for data collection   | 3.813 to 68.341°.                           |
| Index ranges                      | -11 ≤ h ≤ 11, -27 ≤ k ≤ 23, -11 ≤ l ≤ 11    |
| Reflections collected             | 38470                                       |
| Independent reflections           | 4040 [R(int) = 0.0283]                      |
| Completeness to theta = 67.000°   | 99.9 %                                      |
| Absorption correction             | Semi-empirical from equivalents             |
| Max. and min. transmission        | 0.753 and 0.706                             |
| Refinement method                 | Full-matrix least-squares on F <sup>2</sup> |
| Data / restraints / parameters    | 4040 / 0 / 296                              |
| Goodness-of-fit on F <sup>2</sup> | 1.029                                       |
| Final R indices [I > 2σ(I)]       | R1 = 0.0345, wR2 = 0.0877                   |
| R indices (all data)              | R1 = 0.0358, wR2 = 0.0888                   |
| Extinction coefficient            | n/a                                         |
| Largest diff. peak and hole       | 0.322 and -0.185 e. <sup>≈-3</sup>          |

Table 7. Atomic coordinates ( $\times 10^4$ ) and equivalent isotropic displacement parameters ( $\approx^2 \times 10^3$ ) for terretonin L (**10**).  $U(\text{eq})$  is defined as one third of the trace of the orthogonalized  $U^{ij}$  tensor.

|       | x       | y       | z       | $U(\text{eq})$ |
|-------|---------|---------|---------|----------------|
| C(1)  | 5082(1) | 2509(1) | 7678(1) | 17(1)          |
| C(2)  | 4269(1) | 2848(1) | 6467(1) | 14(1)          |
| C(3)  | 4452(1) | 2523(1) | 5152(1) | 16(1)          |
| C(4)  | 3353(1) | 3354(1) | 3939(1) | 17(1)          |
| C(5)  | 3150(1) | 3565(1) | 2478(1) | 22(1)          |
| C(6)  | 4387(1) | 3717(1) | 4903(1) | 15(1)          |
| C(7)  | 4803(1) | 3494(1) | 6394(1) | 13(1)          |
| C(8)  | 6408(1) | 3470(1) | 6585(1) | 15(1)          |
| C(9)  | 8229(1) | 2959(1) | 5798(1) | 21(1)          |
| C(10) | 4247(1) | 3920(1) | 7454(1) | 13(1)          |
| C(11) | 4803(1) | 3744(1) | 8949(1) | 17(1)          |
| C(12) | 2624(1) | 3895(1) | 7112(1) | 13(1)          |
| C(13) | 2111(1) | 3284(1) | 7367(1) | 16(1)          |
| C(14) | 2711(1) | 2817(1) | 6582(1) | 15(1)          |
| C(15) | 1948(1) | 2366(1) | 6095(1) | 20(1)          |
| C(16) | 4769(1) | 4543(1) | 7279(1) | 16(1)          |
| C(17) | 3960(1) | 4998(1) | 7945(1) | 16(1)          |
| C(18) | 2408(1) | 4960(1) | 7364(1) | 14(1)          |

|       |         |         |         |       |
|-------|---------|---------|---------|-------|
| C(19) | 1803(1) | 4376(1) | 7767(1) | 14(1) |
| C(20) | 1850(1) | 4290(1) | 9317(1) | 17(1) |
| C(21) | 267(1)  | 4339(1) | 7073(1) | 18(1) |
| C(22) | -600(1) | 4869(1) | 7335(1) | 20(1) |
| C(23) | 43(1)   | 5428(1) | 6994(1) | 19(1) |
| C(24) | 1582(1) | 5520(1) | 7579(1) | 17(1) |
| C(25) | 1657(1) | 5703(1) | 9086(1) | 20(1) |
| C(26) | 2142(2) | 6018(1) | 6811(2) | 26(1) |
| O(1)  | 4953(1) | 2050(1) | 5124(1) | 21(1) |
| O(2)  | 3948(1) | 2778(1) | 3943(1) | 18(1) |
| O(3)  | 6770(1) | 3110(1) | 5640(1) | 18(1) |
| O(4)  | 4922(1) | 4136(1) | 4492(1) | 20(1) |
| O(5)  | 7229(1) | 3714(1) | 7418(1) | 22(1) |
| O(6)  | -644(1) | 5792(1) | 6302(1) | 29(1) |

---

Table 8. Bond lengths [ $\text{\AA}$ ] and angles [ $^\circ$ ] for terretonin L (**10**)

---

|            |            |
|------------|------------|
| C(1)-C(2)  | 1.5422(16) |
| C(1)-H(1A) | 0.9800     |
| C(1)-H(1B) | 0.9800     |
| C(1)-H(1C) | 0.9800     |
| C(2)-C(3)  | 1.5412(17) |
| C(2)-C(14) | 1.5417(16) |
| C(2)-C(7)  | 1.5900(16) |
| C(3)-O(1)  | 1.2018(16) |
| C(3)-O(2)  | 1.3537(15) |
| C(4)-O(2)  | 1.4566(14) |
| C(4)-C(5)  | 1.5104(17) |
| C(4)-C(6)  | 1.5233(17) |
| C(4)-H(4)  | 1.0000     |
| C(5)-H(5A) | 0.9800     |
| C(5)-H(5B) | 0.9800     |
| C(5)-H(5C) | 0.9800     |
| C(6)-O(4)  | 1.2048(15) |
| C(6)-C(7)  | 1.5563(16) |
| C(7)-C(8)  | 1.5440(16) |
| C(7)-C(10) | 1.5991(16) |
| C(8)-O(5)  | 1.1946(15) |

|              |            |
|--------------|------------|
| C(8)-O(3)    | 1.3443(15) |
| C(9)-O(3)    | 1.4471(14) |
| C(9)-H(9A)   | 0.9800     |
| C(9)-H(9B)   | 0.9800     |
| C(9)-H(9C)   | 0.9800     |
| C(10)-C(11)  | 1.5474(16) |
| C(10)-C(16)  | 1.5506(16) |
| C(10)-C(12)  | 1.5625(15) |
| C(11)-H(11A) | 0.9800     |
| C(11)-H(11B) | 0.9800     |
| C(11)-H(11C) | 0.9800     |
| C(12)-C(13)  | 1.5368(16) |
| C(12)-C(19)  | 1.5716(16) |
| C(12)-H(12)  | 1.0000     |
| C(13)-C(14)  | 1.5067(17) |
| C(13)-H(13A) | 0.9900     |
| C(13)-H(13B) | 0.9900     |
| C(14)-C(15)  | 1.3273(18) |
| C(15)-H(15A) | 0.9500     |
| C(15)-H(15B) | 0.9500     |
| C(16)-C(17)  | 1.5298(16) |
| C(16)-H(16A) | 0.9900     |
| C(16)-H(16B) | 0.9900     |



|              |            |
|--------------|------------|
| C(17)-C(18)  | 1.5300(16) |
| C(17)-H(17A) | 0.9900     |
| C(17)-H(17B) | 0.9900     |
| C(18)-C(19)  | 1.5540(16) |
| C(18)-C(24)  | 1.5615(16) |
| C(18)-H(18)  | 1.0000     |
| C(19)-C(20)  | 1.5430(16) |
| C(19)-C(21)  | 1.5441(16) |
| C(20)-H(20A) | 0.9800     |
| C(20)-H(20B) | 0.9800     |
| C(20)-H(20C) | 0.9800     |
| C(21)-C(22)  | 1.5358(17) |
| C(21)-H(21A) | 0.9900     |
| C(21)-H(21B) | 0.9900     |
| C(22)-C(23)  | 1.5030(19) |
| C(22)-H(22A) | 0.9900     |
| C(22)-H(22B) | 0.9900     |
| C(23)-O(6)   | 1.2168(16) |
| C(23)-C(24)  | 1.5316(18) |
| C(24)-C(26)  | 1.5306(17) |
| C(24)-C(25)  | 1.5423(17) |
| C(25)-H(25A) | 0.9800     |
| C(25)-H(25B) | 0.9800     |

|                  |            |
|------------------|------------|
| C(25)-H(25C)     | 0.9800     |
| C(26)-H(26A)     | 0.9800     |
| C(26)-H(26B)     | 0.9800     |
| C(26)-H(26C)     | 0.9800     |
| C(2)-C(1)-H(1A)  | 109.5      |
| C(2)-C(1)-H(1B)  | 109.5      |
| H(1A)-C(1)-H(1B) | 109.5      |
| C(2)-C(1)-H(1C)  | 109.5      |
| H(1A)-C(1)-H(1C) | 109.5      |
| H(1B)-C(1)-H(1C) | 109.5      |
| C(3)-C(2)-C(14)  | 106.89(9)  |
| C(3)-C(2)-C(1)   | 107.07(10) |
| C(14)-C(2)-C(1)  | 107.79(9)  |
| C(3)-C(2)-C(7)   | 109.81(9)  |
| C(14)-C(2)-C(7)  | 112.33(9)  |
| C(1)-C(2)-C(7)   | 112.65(9)  |
| O(1)-C(3)-O(2)   | 117.90(11) |
| O(1)-C(3)-C(2)   | 124.67(11) |
| O(2)-C(3)-C(2)   | 117.35(10) |
| O(2)-C(4)-C(5)   | 106.88(10) |
| O(2)-C(4)-C(6)   | 106.40(9)  |
| C(5)-C(4)-C(6)   | 113.08(10) |

|                  |            |
|------------------|------------|
| O(2)-C(4)-H(4)   | 110.1      |
| C(5)-C(4)-H(4)   | 110.1      |
| C(6)-C(4)-H(4)   | 110.1      |
| C(4)-C(5)-H(5A)  | 109.5      |
| C(4)-C(5)-H(5B)  | 109.5      |
| H(5A)-C(5)-H(5B) | 109.5      |
| C(4)-C(5)-H(5C)  | 109.5      |
| H(5A)-C(5)-H(5C) | 109.5      |
| H(5B)-C(5)-H(5C) | 109.5      |
| O(4)-C(6)-C(4)   | 120.77(11) |
| O(4)-C(6)-C(7)   | 121.96(11) |
| C(4)-C(6)-C(7)   | 117.10(10) |
| C(8)-C(7)-C(6)   | 103.27(9)  |
| C(8)-C(7)-C(2)   | 107.05(9)  |
| C(6)-C(7)-C(2)   | 108.62(9)  |
| C(8)-C(7)-C(10)  | 112.69(9)  |
| C(6)-C(7)-C(10)  | 110.79(9)  |
| C(2)-C(7)-C(10)  | 113.81(9)  |
| O(5)-C(8)-O(3)   | 123.64(11) |
| O(5)-C(8)-C(7)   | 128.17(11) |
| O(3)-C(8)-C(7)   | 108.19(10) |
| O(3)-C(9)-H(9A)  | 109.5      |
| O(3)-C(9)-H(9B)  | 109.5      |

|                     |            |
|---------------------|------------|
| H(9A)-C(9)-H(9B)    | 109.5      |
| O(3)-C(9)-H(9C)     | 109.5      |
| H(9A)-C(9)-H(9C)    | 109.5      |
| H(9B)-C(9)-H(9C)    | 109.5      |
| C(11)-C(10)-C(16)   | 106.43(9)  |
| C(11)-C(10)-C(12)   | 112.43(9)  |
| C(16)-C(10)-C(12)   | 110.37(9)  |
| C(11)-C(10)-C(7)    | 111.28(9)  |
| C(16)-C(10)-C(7)    | 110.47(9)  |
| C(12)-C(10)-C(7)    | 105.92(9)  |
| C(10)-C(11)-H(11A)  | 109.5      |
| C(10)-C(11)-H(11B)  | 109.5      |
| H(11A)-C(11)-H(11B) | 109.5      |
| C(10)-C(11)-H(11C)  | 109.5      |
| H(11A)-C(11)-H(11C) | 109.5      |
| H(11B)-C(11)-H(11C) | 109.5      |
| C(13)-C(12)-C(10)   | 110.03(9)  |
| C(13)-C(12)-C(19)   | 112.60(9)  |
| C(10)-C(12)-C(19)   | 116.73(9)  |
| C(13)-C(12)-H(12)   | 105.5      |
| C(10)-C(12)-H(12)   | 105.5      |
| C(19)-C(12)-H(12)   | 105.5      |
| C(14)-C(13)-C(12)   | 114.42(10) |

|                     |            |
|---------------------|------------|
| C(14)-C(13)-H(13A)  | 108.7      |
| C(12)-C(13)-H(13A)  | 108.7      |
| C(14)-C(13)-H(13B)  | 108.7      |
| C(12)-C(13)-H(13B)  | 108.7      |
| H(13A)-C(13)-H(13B) | 107.6      |
| C(15)-C(14)-C(13)   | 120.85(11) |
| C(15)-C(14)-C(2)    | 120.60(11) |
| C(13)-C(14)-C(2)    | 118.33(10) |
| C(14)-C(15)-H(15A)  | 120.0      |
| C(14)-C(15)-H(15B)  | 120.0      |
| H(15A)-C(15)-H(15B) | 120.0      |
| C(17)-C(16)-C(10)   | 113.13(10) |
| C(17)-C(16)-H(16A)  | 109.0      |
| C(10)-C(16)-H(16A)  | 109.0      |
| C(17)-C(16)-H(16B)  | 109.0      |
| C(10)-C(16)-H(16B)  | 109.0      |
| H(16A)-C(16)-H(16B) | 107.8      |
| C(16)-C(17)-C(18)   | 110.19(10) |
| C(16)-C(17)-H(17A)  | 109.6      |
| C(18)-C(17)-H(17A)  | 109.6      |
| C(16)-C(17)-H(17B)  | 109.6      |
| C(18)-C(17)-H(17B)  | 109.6      |
| H(17A)-C(17)-H(17B) | 108.1      |

|                     |            |
|---------------------|------------|
| C(17)-C(18)-C(19)   | 110.26(9)  |
| C(17)-C(18)-C(24)   | 113.58(10) |
| C(19)-C(18)-C(24)   | 117.73(9)  |
| C(17)-C(18)-H(18)   | 104.6      |
| C(19)-C(18)-H(18)   | 104.6      |
| C(24)-C(18)-H(18)   | 104.6      |
| C(20)-C(19)-C(21)   | 107.78(10) |
| C(20)-C(19)-C(18)   | 114.68(10) |
| C(21)-C(19)-C(18)   | 108.33(9)  |
| C(20)-C(19)-C(12)   | 112.61(9)  |
| C(21)-C(19)-C(12)   | 107.36(9)  |
| C(18)-C(19)-C(12)   | 105.80(9)  |
| C(19)-C(20)-H(20A)  | 109.5      |
| C(19)-C(20)-H(20B)  | 109.5      |
| H(20A)-C(20)-H(20B) | 109.5      |
| C(19)-C(20)-H(20C)  | 109.5      |
| H(20A)-C(20)-H(20C) | 109.5      |
| H(20B)-C(20)-H(20C) | 109.5      |
| C(22)-C(21)-C(19)   | 113.56(10) |
| C(22)-C(21)-H(21A)  | 108.9      |
| C(19)-C(21)-H(21A)  | 108.9      |
| C(22)-C(21)-H(21B)  | 108.9      |
| C(19)-C(21)-H(21B)  | 108.9      |

|                     |            |
|---------------------|------------|
| H(21A)-C(21)-H(21B) | 107.7      |
| C(23)-C(22)-C(21)   | 113.09(10) |
| C(23)-C(22)-H(22A)  | 109.0      |
| C(21)-C(22)-H(22A)  | 109.0      |
| C(23)-C(22)-H(22B)  | 109.0      |
| C(21)-C(22)-H(22B)  | 109.0      |
| H(22A)-C(22)-H(22B) | 107.8      |
| O(6)-C(23)-C(22)    | 121.00(12) |
| O(6)-C(23)-C(24)    | 122.05(12) |
| C(22)-C(23)-C(24)   | 116.93(10) |
| C(26)-C(24)-C(23)   | 108.83(11) |
| C(26)-C(24)-C(25)   | 108.14(11) |
| C(23)-C(24)-C(25)   | 107.11(10) |
| C(26)-C(24)-C(18)   | 109.02(10) |
| C(23)-C(24)-C(18)   | 109.02(10) |
| C(25)-C(24)-C(18)   | 114.59(10) |
| C(24)-C(25)-H(25A)  | 109.5      |
| C(24)-C(25)-H(25B)  | 109.5      |
| H(25A)-C(25)-H(25B) | 109.5      |
| C(24)-C(25)-H(25C)  | 109.5      |
| H(25A)-C(25)-H(25C) | 109.5      |
| H(25B)-C(25)-H(25C) | 109.5      |
| C(24)-C(26)-H(26A)  | 109.5      |

|                     |            |
|---------------------|------------|
| C(24)-C(26)-H(26B)  | 109.5      |
| H(26A)-C(26)-H(26B) | 109.5      |
| C(24)-C(26)-H(26C)  | 109.5      |
| H(26A)-C(26)-H(26C) | 109.5      |
| H(26B)-C(26)-H(26C) | 109.5      |
| C(3)-O(2)-C(4)      | 119.34(9)  |
| C(8)-O(3)-C(9)      | 116.06(10) |

---

Symmetry transformations used to generate equivalent atoms:

Table 9. Anisotropic displacement parameters ( $\approx 2 \times 10^3$ ) for terretonin L (**10**). The anisotropic displacement factor exponent takes the form:  $-2\pi^2 [ h^2 a^{*2} U^{11} + \dots + 2 h k a^* b^* U^{12} ]$

---

|      | $U^{11}$ | $U^{22}$ | $U^{33}$ | $U^{23}$ | $U^{13}$ | $U^{12}$ |
|------|----------|----------|----------|----------|----------|----------|
| C(1) | 16(1)    | 16(1)    | 19(1)    | 3(1)     | 2(1)     | 1(1)     |
| C(2) | 14(1)    | 12(1)    | 16(1)    | 1(1)     | 2(1)     | 0(1)     |
| C(3) | 14(1)    | 16(1)    | 19(1)    | 0(1)     | 3(1)     | -2(1)    |
| C(4) | 18(1)    | 16(1)    | 16(1)    | 1(1)     | 2(1)     | 2(1)     |
| C(5) | 25(1)    | 24(1)    | 16(1)    | 2(1)     | 2(1)     | 2(1)     |
| C(6) | 13(1)    | 15(1)    | 17(1)    | -1(1)    | 5(1)     | 3(1)     |
| C(7) | 12(1)    | 12(1)    | 15(1)    | 1(1)     | 2(1)     | -1(1)    |
| C(8) | 15(1)    | 13(1)    | 19(1)    | 3(1)     | 4(1)     | 1(1)     |
| C(9) | 14(1)    | 22(1)    | 28(1)    | 1(1)     | 7(1)     | 4(1)     |



|       |       |       |       |       |       |       |
|-------|-------|-------|-------|-------|-------|-------|
| C(10) | 12(1) | 13(1) | 15(1) | 0(1)  | 2(1)  | 0(1)  |
| C(11) | 16(1) | 18(1) | 15(1) | -1(1) | 0(1)  | 2(1)  |
| C(12) | 12(1) | 14(1) | 13(1) | 0(1)  | 2(1)  | -1(1) |
| C(13) | 13(1) | 16(1) | 20(1) | 0(1)  | 5(1)  | -2(1) |
| C(14) | 14(1) | 15(1) | 16(1) | 4(1)  | 1(1)  | 0(1)  |
| C(15) | 16(1) | 18(1) | 25(1) | -1(1) | 3(1)  | -1(1) |
| C(16) | 13(1) | 14(1) | 22(1) | -2(1) | 5(1)  | -2(1) |
| C(17) | 16(1) | 13(1) | 19(1) | -1(1) | 4(1)  | -1(1) |
| C(18) | 15(1) | 14(1) | 13(1) | 1(1)  | 4(1)  | 1(1)  |
| C(19) | 13(1) | 15(1) | 14(1) | 0(1)  | 3(1)  | 0(1)  |
| C(20) | 19(1) | 17(1) | 16(1) | 1(1)  | 6(1)  | 0(1)  |
| C(21) | 14(1) | 20(1) | 20(1) | -2(1) | 2(1)  | 1(1)  |
| C(22) | 14(1) | 25(1) | 23(1) | -2(1) | 3(1)  | 3(1)  |
| C(23) | 22(1) | 24(1) | 14(1) | -1(1) | 5(1)  | 9(1)  |
| C(24) | 20(1) | 15(1) | 19(1) | 1(1)  | 7(1)  | 3(1)  |
| C(25) | 20(1) | 19(1) | 22(1) | -5(1) | 6(1)  | 1(1)  |
| C(26) | 30(1) | 17(1) | 34(1) | 7(1)  | 16(1) | 6(1)  |
| O(1)  | 23(1) | 15(1) | 26(1) | -2(1) | 5(1)  | 3(1)  |
| O(2)  | 23(1) | 16(1) | 16(1) | -2(1) | 2(1)  | 2(1)  |
| O(3)  | 13(1) | 19(1) | 22(1) | -2(1) | 5(1)  | 1(1)  |
| O(4)  | 23(1) | 18(1) | 19(1) | 3(1)  | 7(1)  | -1(1) |
| O(5)  | 13(1) | 24(1) | 28(1) | -6(1) | 2(1)  | -2(1) |
| O(6)  | 30(1) | 31(1) | 25(1) | 7(1)  | 3(1)  | 13(1) |

Table 10. Hydrogen coordinates ( $\times 10^4$ ) and isotropic displacement parameters ( $\approx^2 \times 10^3$ )

for terretonin L (**10**).

|        | x    | y    | z    | U(eq) |
|--------|------|------|------|-------|
| H(1A)  | 4790 | 2636 | 8531 | 25    |
| H(1B)  | 6081 | 2579 | 7726 | 25    |
| H(1C)  | 4892 | 2096 | 7548 | 25    |
| H(4)   | 2439 | 3340 | 4273 | 20    |
| H(5A)  | 4041 | 3554 | 2141 | 33    |
| H(5B)  | 2798 | 3962 | 2438 | 33    |
| H(5C)  | 2478 | 3317 | 1907 | 33    |
| H(9A)  | 8762 | 3291 | 5555 | 31    |
| H(9B)  | 8351 | 2634 | 5197 | 31    |
| H(9C)  | 8564 | 2850 | 6750 | 31    |
| H(11A) | 5764 | 3606 | 9018 | 26    |
| H(11B) | 4220 | 3435 | 9227 | 26    |
| H(11C) | 4777 | 4078 | 9550 | 26    |
| H(12)  | 2393 | 3956 | 6102 | 16    |
| H(13A) | 2346 | 3198 | 8356 | 20    |
| H(13B) | 1084 | 3276 | 7121 | 20    |
| H(15A) | 1011 | 2335 | 6240 | 24    |

|        |       |      |      |    |
|--------|-------|------|------|----|
| H(15B) | 2339  | 2075 | 5601 | 24 |
| H(16A) | 5766  | 4567 | 7686 | 19 |
| H(16B) | 4690  | 4629 | 6291 | 19 |
| H(17A) | 4312  | 5387 | 7770 | 19 |
| H(17B) | 4101  | 4936 | 8946 | 19 |
| H(18)  | 2371  | 4934 | 6352 | 17 |
| H(20A) | 1110  | 4517 | 9622 | 26 |
| H(20B) | 2755  | 4416 | 9808 | 26 |
| H(20C) | 1716  | 3880 | 9507 | 26 |
| H(21A) | 232   | 4294 | 6075 | 21 |
| H(21B) | -158  | 3991 | 7411 | 21 |
| H(22A) | -1538 | 4834 | 6780 | 24 |
| H(22B) | -711  | 4874 | 8310 | 24 |
| H(25A) | 2633  | 5746 | 9511 | 30 |
| H(25B) | 1213  | 5407 | 9576 | 30 |
| H(25C) | 1171  | 6071 | 9129 | 30 |
| H(26A) | 2198  | 5896 | 5875 | 38 |
| H(26B) | 3071  | 6126 | 7280 | 38 |
| H(26C) | 1516  | 6350 | 6786 | 38 |

---

## Computational Section

### Table of Contents

|                                                                             |       |
|-----------------------------------------------------------------------------|-------|
| Computational General Information .....                                     | SI-36 |
| Summary of Minimized Structures and Energies .....                          | SI-37 |
| Minimized Structures and Energies .....                                     | SI-39 |
| NBO Analysis .....                                                          | SI-75 |
| Truncated Model System Minimization and Energies (radical and cation) ..... | SI-77 |
| References .....                                                            | SI-88 |

### Computational General Information

DFT optimizations were performed using Gaussian '09<sup>1</sup> (on the Omega and Grace Clusters at Yale University)<sup>2</sup> at both the mPW1PW91/6-31+G(d,p)//B3LYP/6-31G\* and B3LYP/6-31+G(d,p)//B3LYP/6-31G\* levels of theory<sup>3</sup> using gas-phase geometries at 298K. Natural bond order (NBO)<sup>4</sup> analysis was conducted using the mPW1PW91 functional with the 6-31+G(d,p) basis set.

Optimized structures are displayed visually and listed with energies and geometric coordinates. Ground state structures display no imaginary frequencies while transition state structures display one imaginary frequency that corresponds to the transition state movement.

The following abbreviations are used:

PA – protoaustinoid A

AN – andrastin E

TE – preterretonin A

PAC – protoaustinoid A carbocation

ATC – andrastin E/preterretonin A carbocation

TS – transition state

DK – diketone isomer

EN – enol north isomer

ES – enol south isomer

## Summary of Minimized Structures and Energies (Neutral Structures)

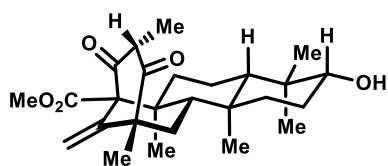

**PA-DK**  
 B3LYP: 0.0 kcal/mol  
 mPW1PW91: 0.0 kcal/mol

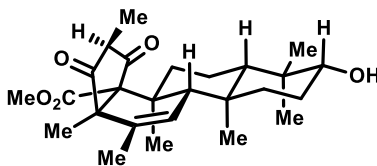

**AN-DK**  
 B3LYP: -2.8 kcal/mol  
 mPW1PW91: -2.8 kcal/mol

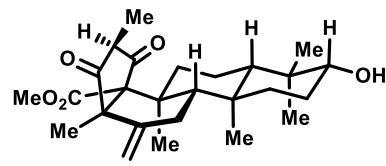

**TE-DK**  
 B3LYP: +5.0 kcal/mol  
 mPW1PW91: +5.2 kcal/mol

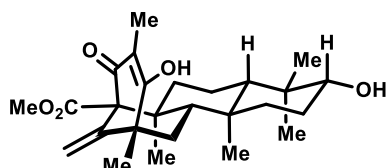

**PA-EN**  
 B3LYP: +3.5 kcal/mol  
 mPW1PW91: +3.1 kcal/mol

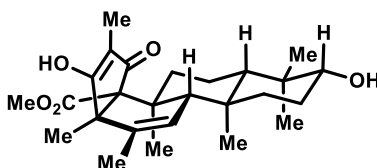

**AN-EN**  
 B3LYP: -0.6 kcal/mol  
 mPW1PW91: -0.6 kcal/mol

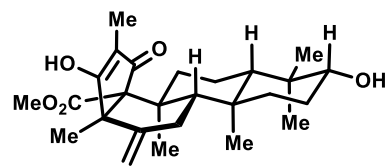

**TE-EN**  
 B3LYP: +4.9 kcal/mol  
 mPW1PW91: +4.5 kcal/mol

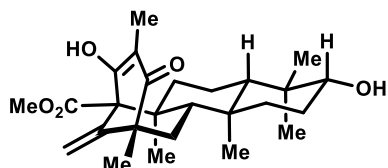

**PA-ES**  
 B3LYP: +3.7 kcal/mol  
 mPW1PW91: +3.4 kcal/mol

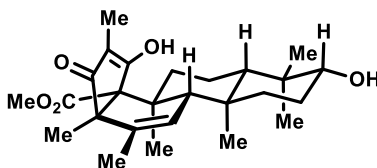

**AN-ES**  
 B3LYP: -1.6 kcal/mol  
 mPW1PW91: -2.0 kcal/mol

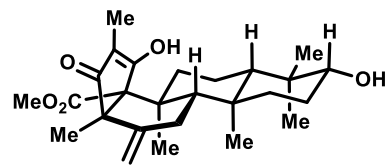

**TE-ES**  
 B3LYP: +6.1 kcal/mol  
 mPW1PW91: +5.9 kcal/mol

## Energies of Minimized Structures (Neutral Structures)

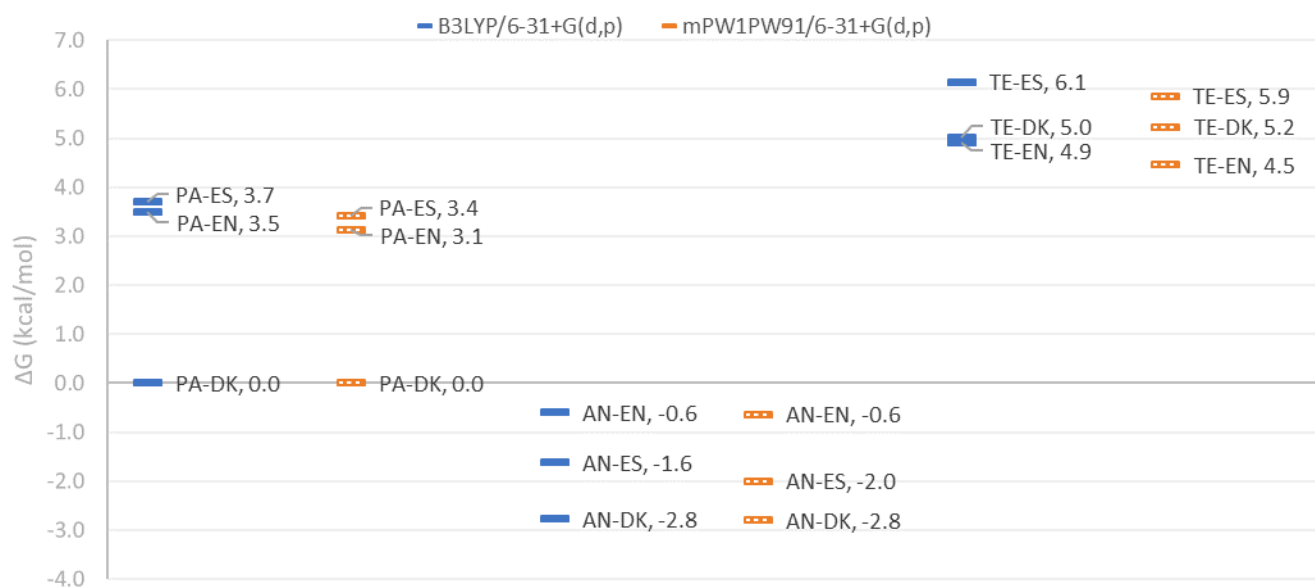

## Summary of Minimized Structures and Energies (Charged Structures)

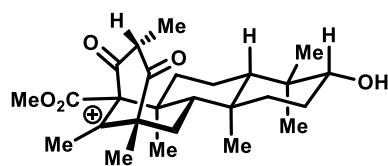

**PAC-DK**  
B3LYP: 0.0 kcal/mol  
mPW1PW91: 0.0 kcal/mol

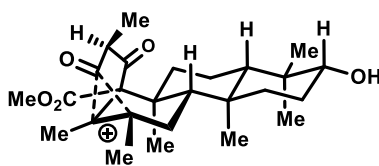

**TS-DK**  
B3LYP: +5.7 kcal/mol  
mPW1PW91: +6.8 kcal/mol

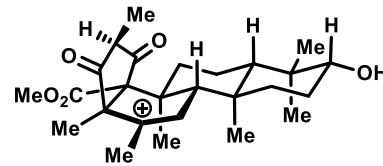

**ATC-DK**  
B3LYP: -1.2 kcal/mol  
mPW1PW91: -1.5 kcal/mol

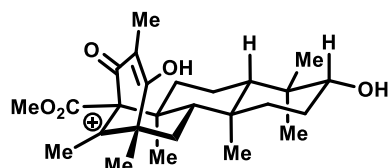

**PAC-EN**  
B3LYP: -3.1 kcal/mol  
mPW1PW91: -3.2 kcal/mol

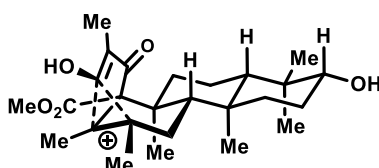

**TS-EN**  
B3LYP: +8.9 kcal/mol  
mPW1PW91: +5.9 kcal/mol

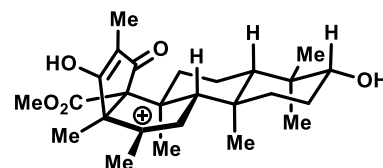

**ATC-EN**  
B3LYP: -1.4 kcal/mol  
mPW1PW91: -2.8 kcal/mol

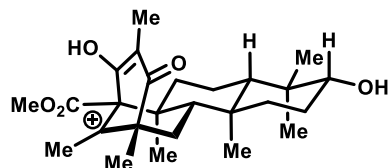

**PAC-ES**  
B3LYP: -3.1 kcal/mol  
mPW1PW91: -3.4 kcal/mol

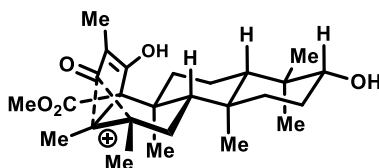

**TS-ES**  
B3LYP: -1.7 kcal/mol  
mPW1PW91: -2.6 kcal/mol

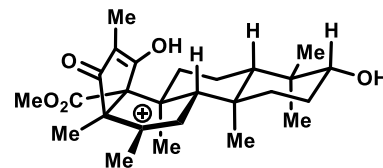

**ATC-ES**  
B3LYP: -10.5 kcal/mol  
mPW1PW91: -11.6 kcal/mol

## Energies of Minimized Structures (Charged Structures)

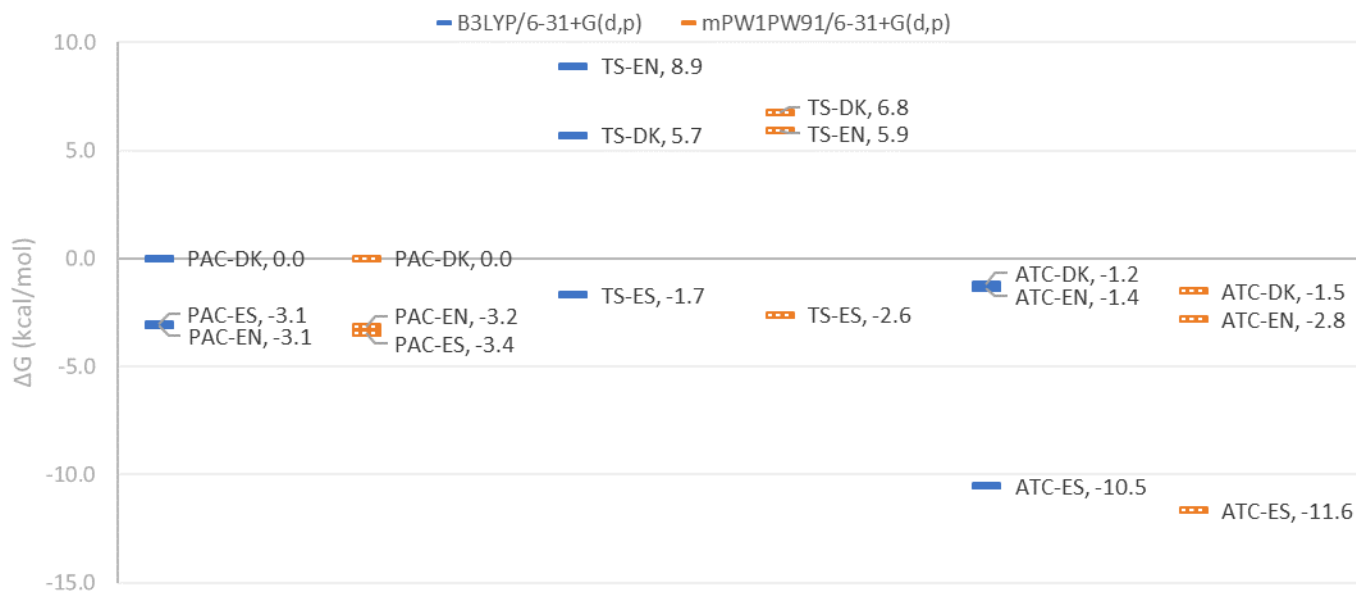

## Minimized Structures and Energies

### PA-DK

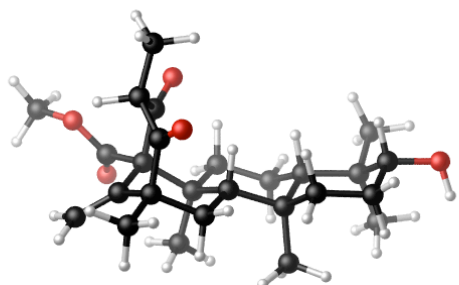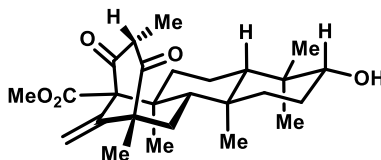

#### B3LYP/6-31+G(d,p)//B3LYP/6-31G\*

|                                              |                             |
|----------------------------------------------|-----------------------------|
| Zero-point correction=                       | 0.602720 (Hartree/Particle) |
| Thermal correction to Energy=                | 0.633568                    |
| Thermal correction to Enthalpy=              | 0.634512                    |
| Thermal correction to Gibbs Free Energy=     | 0.545705                    |
| Sum of electronic and zero-point Energies=   | -1389.238802                |
| Sum of electronic and thermal Energies=      | -1389.207954                |
| Sum of electronic and thermal Enthalpies=    | -1389.207010                |
| Sum of electronic and thermal Free Energies= | -1389.295816                |

#### MPW1PW91/6-31+G(d,p)//B3LYP/G-31G\*

|                                              |                             |
|----------------------------------------------|-----------------------------|
| Zero-point correction=                       | 0.605391 (Hartree/Particle) |
| Thermal correction to Energy=                | 0.635691                    |
| Thermal correction to Enthalpy=              | 0.636635                    |
| Thermal correction to Gibbs Free Energy=     | 0.550332                    |
| Sum of electronic and zero-point Energies=   | -1388.929778                |
| Sum of electronic and thermal Energies=      | -1388.899478                |
| Sum of electronic and thermal Enthalpies=    | -1388.898534                |
| Sum of electronic and thermal Free Energies= | -1388.984837                |

|   |             |             |             |
|---|-------------|-------------|-------------|
| C | -4.44701300 | 0.51914900  | 0.88007700  |
| C | -3.93121600 | -0.87107300 | 0.40106500  |
| C | -2.38094500 | -0.75653500 | 0.18283400  |
| C | -1.86555400 | 0.41660700  | -0.72608800 |
| C | -2.48732200 | 1.73851300  | -0.19245300 |
| C | -4.01023000 | 1.67498200  | -0.01955600 |
| O | -5.86108200 | 0.54072700  | 1.09256200  |
| C | -0.29954800 | 0.49142300  | -0.50022700 |
| C | -1.69198800 | -2.07871800 | -0.19311300 |
| C | -0.17490400 | -2.00653000 | 0.03564600  |
| C | 0.50758800  | -0.84174100 | -0.72630700 |
| C | 1.98670500  | -0.55514500 | -0.15432400 |
| C | 2.61456800  | 0.55252400  | -1.00992300 |
| C | 1.87940000  | 1.87812700  | -0.85416900 |
| C | 0.37330600  | 1.68052800  | -1.21834100 |
| C | 3.65426100  | 0.36665900  | -1.82746300 |
| C | 1.91949700  | 2.31750400  | 0.62943700  |
| C | 1.94906600  | -0.06806200 | 1.33416600  |
| C | 2.52539400  | 1.32218800  | 1.61549200  |
| O | 1.46968100  | 3.38742500  | 0.98628700  |

|   |             |             |             |
|---|-------------|-------------|-------------|
| O | 1.52043100  | -0.76226900 | 2.23185900  |
| C | -2.24234200 | 0.27734000  | -2.22343200 |
| C | 0.62180100  | -1.23185500 | -2.22047700 |
| C | -4.21603500 | -1.87087500 | 1.54700200  |
| C | -4.71661700 | -1.35877100 | -0.83581500 |
| C | 2.40859300  | 1.74713000  | 3.07314400  |
| C | 2.89062200  | -1.80471200 | -0.13100200 |
| O | 2.72509300  | -2.85082300 | -0.71597000 |
| O | 3.96970000  | -1.57222400 | 0.65122800  |
| C | 4.89762000  | -2.66445200 | 0.77740000  |
| C | 2.45479800  | 3.02493400  | -1.70147600 |
| H | -4.02781600 | 0.69069900  | 1.88064500  |
| H | -2.00005400 | -0.50292200 | 1.18690600  |
| H | -2.03593300 | 1.97867200  | 0.78115700  |
| H | -2.24238800 | 2.57330600  | -0.85943600 |
| H | -4.37350800 | 2.61221700  | 0.41856300  |
| H | -4.50598300 | 1.58558800  | -0.99700600 |
| H | -6.28480300 | 0.53047300  | 0.21968800  |
| H | -0.22551700 | 0.69689800  | 0.57884100  |
| H | -2.08107900 | -2.89508300 | 0.42381200  |
| H | -1.91836600 | -2.35578000 | -1.22981200 |
| H | 0.29180100  | -2.94942600 | -0.26511200 |
| H | 0.00134400  | -1.89700400 | 1.10849800  |
| H | -0.13358700 | 2.61539000  | -0.96476100 |
| H | 0.31368800  | 1.56800300  | -2.30560900 |
| H | 4.14338000  | -0.59676900 | -1.93354200 |
| H | 4.05128000  | 1.16801100  | -2.44085800 |
| H | 3.58425300  | 1.23260000  | 1.31438800  |
| H | -2.22499200 | -0.75390800 | -2.58033700 |
| H | -3.24520700 | 0.66450800  | -2.41989900 |
| H | -1.56146300 | 0.85262400  | -2.85763400 |
| H | 0.93407000  | -0.40448500 | -2.86082000 |
| H | 1.34395100  | -2.04084700 | -2.33850500 |
| H | -0.33707600 | -1.59495100 | -2.59323300 |
| H | -4.06576300 | -2.91036100 | 1.23762600  |
| H | -5.25539800 | -1.76417900 | 1.87180300  |
| H | -3.57014500 | -1.68023300 | 2.41326400  |
| H | -4.71635700 | -0.64725500 | -1.66584200 |
| H | -4.30542600 | -2.30045500 | -1.21408700 |
| H | -5.75971800 | -1.55555400 | -0.56193300 |
| H | 2.86292500  | 2.73056500  | 3.21738900  |
| H | 2.90223000  | 1.02050600  | 3.72304100  |
| H | 1.35966700  | 1.81260900  | 3.37469900  |
| H | 5.67601500  | -2.30724100 | 1.45164100  |
| H | 4.39739100  | -3.54167600 | 1.19450100  |
| H | 5.32020900  | -2.92223700 | -0.19727800 |
| H | 3.51017600  | 3.20826900  | -1.47146500 |
| H | 2.36975800  | 2.79914200  | -2.76947500 |
| H | 1.90081800  | 3.94274800  | -1.49011900 |



## PA-EN

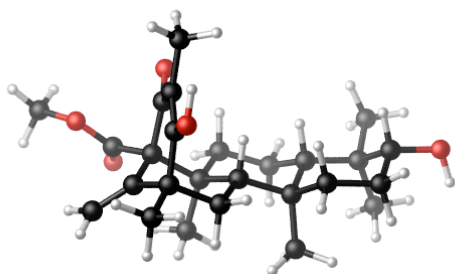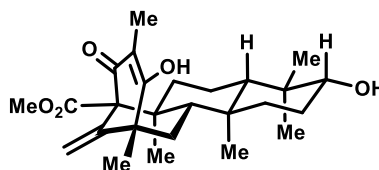

### B3LYP/6-31+G(d,p)//B3LYP/6-31G\*

|                                              |                             |
|----------------------------------------------|-----------------------------|
| Zero-point correction=                       | 0.603688 (Hartree/Particle) |
| Thermal correction to Energy=                | 0.634381                    |
| Thermal correction to Enthalpy=              | 0.635325                    |
| Thermal correction to Gibbs Free Energy=     | 0.547373                    |
| Sum of electronic and zero-point Energies=   | -1389.233931                |
| Sum of electronic and thermal Energies=      | -1389.203238                |
| Sum of electronic and thermal Enthalpies=    | -1389.202293                |
| Sum of electronic and thermal Free Energies= | -1389.290246                |

### MPW1PW91/6-31+G(d,p)//B3LYP/G-31G\*

|                                              |                             |
|----------------------------------------------|-----------------------------|
| Zero-point correction=                       | 0.606481 (Hartree/Particle) |
| Thermal correction to Energy=                | 0.636588                    |
| Thermal correction to Enthalpy=              | 0.637533                    |
| Thermal correction to Gibbs Free Energy=     | 0.551987                    |
| Sum of electronic and zero-point Energies=   | -1388.925361                |
| Sum of electronic and thermal Energies=      | -1388.895253                |
| Sum of electronic and thermal Enthalpies=    | -1388.894309                |
| Sum of electronic and thermal Free Energies= | -1388.979855                |

|   |             |             |             |
|---|-------------|-------------|-------------|
| C | -4.47652400 | 0.54658000  | 0.81202700  |
| C | -3.94801000 | -0.85835600 | 0.39470200  |
| C | -2.39392300 | -0.74423900 | 0.20485300  |
| C | -1.86317500 | 0.39195900  | -0.74165300 |
| C | -2.49996400 | 1.73061400  | -0.27152300 |
| C | -4.02596300 | 1.66812600  | -0.12410900 |
| O | -5.89425300 | 0.57384500  | 0.99872100  |
| C | -0.30195000 | 0.47600600  | -0.48731900 |
| C | -1.68701300 | -2.07621400 | -0.09417900 |
| C | -0.17316000 | -1.98079800 | 0.14861200  |
| C | 0.51246600  | -0.85860200 | -0.67106100 |
| C | 2.00421500  | -0.56399300 | -0.12208700 |
| C | 2.61708900  | 0.52635500  | -0.99643000 |
| C | 1.89202400  | 1.85904700  | -0.83362300 |
| C | 0.38098400  | 1.65834000  | -1.20122900 |
| C | 3.62898900  | 0.33592700  | -1.84562800 |
| C | 1.98763900  | 2.23871500  | 0.63527900  |
| C | 1.96805000  | -0.08797500 | 1.36461600  |
| C | 2.04209900  | 1.34482100  | 1.65632900  |
| O | 1.95222400  | 3.57540500  | 0.84960500  |
| O | 1.86889300  | -0.92349700 | 2.25871500  |

|   |             |             |             |
|---|-------------|-------------|-------------|
| C | -2.21574100 | 0.19497500  | -2.23895000 |
| C | 0.61847800  | -1.30652200 | -2.14927600 |
| C | -4.25327600 | -1.81782700 | 1.56938800  |
| C | -4.70706700 | -1.39179500 | -0.83970400 |
| C | 2.08661900  | 1.77488600  | 3.10412100  |
| C | 2.89815200  | -1.82480800 | -0.09432100 |
| O | 2.64035600  | -2.92282600 | -0.53667900 |
| O | 4.07700700  | -1.54462100 | 0.50039100  |
| C | 4.97138500  | -2.65707300 | 0.65535800  |
| C | 2.46438400  | 2.97953100  | -1.71855900 |
| H | -4.07570300 | 0.75692100  | 1.81280700  |
| H | -2.03783600 | -0.44374600 | 1.20527000  |
| H | -2.06794600 | 2.00900900  | 0.70118300  |
| H | -2.24652200 | 2.54013400  | -0.96621900 |
| H | -4.40201900 | 2.62045600  | 0.26881000  |
| H | -4.50166200 | 1.53743300  | -1.10671700 |
| H | -6.30262900 | 0.50783600  | 0.12097800  |
| H | -0.24891500 | 0.69761300  | 0.58628300  |
| H | -2.07836400 | -2.86390300 | 0.55775600  |
| H | -1.89689900 | -2.40708600 | -1.11871100 |
| H | 0.30231600  | -2.93659600 | -0.08464600 |
| H | -0.00964000 | -1.80686300 | 1.21677000  |
| H | -0.13693900 | 2.59490600  | -0.97140000 |
| H | 0.33963100  | 1.53680700  | -2.28894700 |
| H | 4.11748000  | -0.62680000 | -1.95209800 |
| H | 4.01630600  | 1.13293400  | -2.46981700 |
| H | -2.20162800 | -0.84981400 | -2.55407600 |
| H | -3.21117100 | 0.58305300  | -2.46997400 |
| H | -1.51671000 | 0.73743200  | -2.88255800 |
| H | 0.90934400  | -0.49770200 | -2.82321300 |
| H | 1.35456700  | -2.10585000 | -2.24389600 |
| H | -0.33498100 | -1.70324200 | -2.50023600 |
| H | -4.09497000 | -2.86692800 | 1.29922200  |
| H | -5.29876800 | -1.70195800 | 1.87083500  |
| H | -3.62386200 | -1.59612900 | 2.44042600  |
| H | -4.69760400 | -0.70636100 | -1.69124400 |
| H | -4.28065000 | -2.34078700 | -1.18054900 |
| H | -5.75339000 | -1.59026200 | -0.57906700 |
| H | 2.98486600  | 2.36421300  | 3.33598000  |
| H | 2.09992900  | 0.88368100  | 3.73480100  |
| H | 1.20727900  | 2.36815900  | 3.39601700  |
| H | 5.85480100  | -2.25240400 | 1.15002600  |
| H | 4.50838100  | -3.43361500 | 1.26957300  |
| H | 5.23479300  | -3.08098100 | -0.31755200 |
| H | 3.51140000  | 3.19089800  | -1.48010600 |
| H | 2.39962000  | 2.69152000  | -2.77217000 |
| H | 1.89623600  | 3.90217800  | -1.58076600 |
| H | 1.96718400  | 3.74332500  | 1.80738700  |

## PA-ES

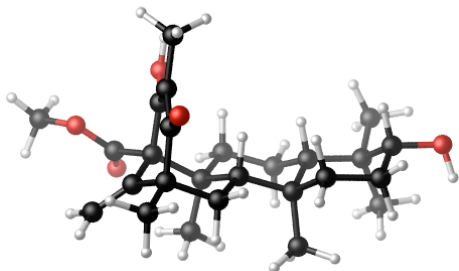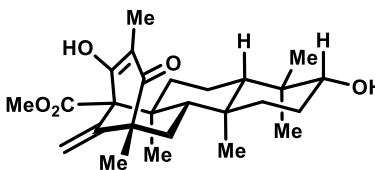

### B3LYP/6-31+G(d,p)//B3LYP/6-31G\*

|                                              |                             |
|----------------------------------------------|-----------------------------|
| Zero-point correction=                       | 0.603453 (Hartree/Particle) |
| Thermal correction to Energy=                | 0.634236                    |
| Thermal correction to Enthalpy=              | 0.635180                    |
| Thermal correction to Gibbs Free Energy=     | 0.546935                    |
| Sum of electronic and zero-point Energies=   | -1389.233408                |
| Sum of electronic and thermal Energies=      | -1389.202625                |
| Sum of electronic and thermal Enthalpies=    | -1389.201681                |
| Sum of electronic and thermal Free Energies= | -1389.289926                |

### MPW1PW91/6-31+G(d,p)//B3LYP/G-31G\*

|                                              |                             |
|----------------------------------------------|-----------------------------|
| Zero-point correction=                       | 0.606266 (Hartree/Particle) |
| Thermal correction to Energy=                | 0.636446                    |
| Thermal correction to Enthalpy=              | 0.637390                    |
| Thermal correction to Gibbs Free Energy=     | 0.551656                    |
| Sum of electronic and zero-point Energies=   | -1388.924790                |
| Sum of electronic and thermal Energies=      | -1388.894610                |
| Sum of electronic and thermal Enthalpies=    | -1388.893666                |
| Sum of electronic and thermal Free Energies= | -1388.979400                |

|   |             |             |             |
|---|-------------|-------------|-------------|
| C | -4.49451800 | 0.50659100  | 0.81669300  |
| C | -3.94907700 | -0.88256300 | 0.36779100  |
| C | -2.39615200 | -0.74649700 | 0.18825900  |
| C | -1.87321400 | 0.41790000  | -0.72801200 |
| C | -2.52573100 | 1.73792600  | -0.22751500 |
| C | -4.05159400 | 1.65591300  | -0.08833900 |
| O | -5.91323200 | 0.51160800  | 0.99713400  |
| C | -0.31389100 | 0.51416800  | -0.46372700 |
| C | -1.67295800 | -2.06413700 | -0.13625700 |
| C | -0.16128000 | -1.95306600 | 0.11404200  |
| C | 0.51165100  | -0.80689900 | -0.68176800 |
| C | 2.00817500  | -0.51313600 | -0.13244000 |
| C | 2.60310700  | 0.60933900  | -0.99252300 |
| C | 1.87461000  | 1.92645900  | -0.79150900 |
| C | 0.36072800  | 1.72398400  | -1.14156300 |
| C | 3.60079500  | 0.43244100  | -1.86148700 |
| C | 1.96063600  | 2.33591900  | 0.70066400  |
| C | 2.01074300  | -0.02788300 | 1.31509000  |
| C | 2.04064100  | 1.26991500  | 1.70729700  |
| O | 1.90600800  | 3.51825700  | 1.02301900  |

|   |             |             |             |
|---|-------------|-------------|-------------|
| O | 1.97314300  | -1.04797700 | 2.20960300  |
| C | -2.21941500 | 0.25387200  | -2.23073600 |
| C | 0.61586000  | -1.21395100 | -2.17219700 |
| C | -4.25051500 | -1.87286500 | 1.51759500  |
| C | -4.69710400 | -1.39458400 | -0.88224100 |
| C | 2.06894500  | 1.66471300  | 3.16520900  |
| C | 2.92407900  | -1.76513800 | -0.16577300 |
| O | 2.67461800  | -2.84415400 | -0.65585800 |
| O | 4.10398500  | -1.49702900 | 0.43102200  |
| C | 5.02964600  | -2.59378500 | 0.49190400  |
| C | 2.42298100  | 3.07750400  | -1.64473600 |
| H | -4.10059900 | 0.69635500  | 1.82441400  |
| H | -2.04914400 | -0.46455600 | 1.19758000  |
| H | -2.10014800 | 1.99821400  | 0.75270300  |
| H | -2.27715600 | 2.56593000  | -0.90124000 |
| H | -4.43809500 | 2.59408100  | 0.32749300  |
| H | -4.52275100 | 1.54551100  | -1.07570700 |
| H | -6.31703200 | 0.48830100  | 0.11511800  |
| H | -0.26761000 | 0.70441500  | 0.61532700  |
| H | -2.05680800 | -2.87086800 | 0.49681100  |
| H | -1.87369200 | -2.37570900 | -1.16822300 |
| H | 0.32938600  | -2.89951900 | -0.12799400 |
| H | -0.01348000 | -1.79022400 | 1.18709200  |
| H | -0.15514300 | 2.64915200  | -0.86713200 |
| H | 0.30032000  | 1.64249300  | -2.23257800 |
| H | 4.09161700  | -0.52518400 | -1.99981600 |
| H | 3.96929300  | 1.24458800  | -2.47751000 |
| H | -2.19746600 | -0.78283100 | -2.57136500 |
| H | -3.21667600 | 0.64060900  | -2.45577700 |
| H | -1.52240700 | 0.81700400  | -2.85825800 |
| H | 0.86992200  | -0.37639600 | -2.82473700 |
| H | 1.37458800  | -1.98608900 | -2.30152900 |
| H | -0.32941800 | -1.63078200 | -2.52131600 |
| H | -4.07917600 | -2.91381800 | 1.22441600  |
| H | -5.29904100 | -1.77557300 | 1.81476900  |
| H | -3.62975700 | -1.66397900 | 2.39824300  |
| H | -4.68710100 | -0.69127000 | -1.71891400 |
| H | -4.26309000 | -2.33369600 | -1.24086900 |
| H | -5.74351400 | -1.60405400 | -0.63130800 |
| H | 2.10686800  | 2.75406800  | 3.23048700  |
| H | 2.94937700  | 1.26518200  | 3.68819900  |
| H | 1.17197100  | 1.33470500  | 3.70967700  |
| H | 5.90983500  | -2.20229600 | 1.00243600  |
| H | 4.59710400  | -3.42744000 | 1.05129700  |
| H | 5.28886800  | -2.93635900 | -0.51342700 |
| H | 3.48015800  | 3.26589000  | -1.43190100 |
| H | 2.31575300  | 2.85487500  | -2.71149000 |
| H | 1.87523500  | 3.99416300  | -1.41744400 |
| H | 1.98994400  | -0.68336100 | 3.11079900  |

## AN-DK

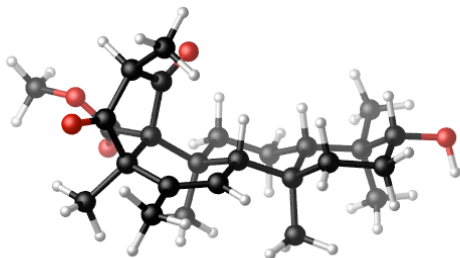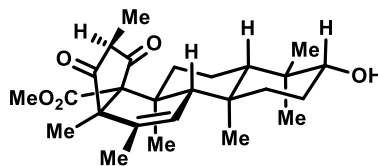

### B3LYP/6-31+G(d,p)//B3LYP/6-31G\*

|                                              |                             |
|----------------------------------------------|-----------------------------|
| Zero-point correction=                       | 0.602333 (Hartree/Particle) |
| Thermal correction to Energy=                | 0.633519                    |
| Thermal correction to Enthalpy=              | 0.634463                    |
| Thermal correction to Gibbs Free Energy=     | 0.545164                    |
| Sum of electronic and zero-point Energies=   | -1389.243068                |
| Sum of electronic and thermal Energies=      | -1389.211883                |
| Sum of electronic and thermal Enthalpies=    | -1389.210939                |
| Sum of electronic and thermal Free Energies= | -1389.300237                |

### MPW1PW91/6-31+G(d,p)//B3LYP/G-31G\*

|                                              |                             |
|----------------------------------------------|-----------------------------|
| Zero-point correction=                       | 0.605059 (Hartree/Particle) |
| Thermal correction to Energy=                | 0.635691                    |
| Thermal correction to Enthalpy=              | 0.636635                    |
| Thermal correction to Gibbs Free Energy=     | 0.549772                    |
| Sum of electronic and zero-point Energies=   | -1388.934002                |
| Sum of electronic and thermal Energies=      | -1388.903370                |
| Sum of electronic and thermal Enthalpies=    | -1388.902425                |
| Sum of electronic and thermal Free Energies= | -1388.989288                |

|   |             |             |             |
|---|-------------|-------------|-------------|
| C | 4.64648100  | -0.53071000 | 0.95440100  |
| C | 4.14313500  | 0.75864400  | 0.23650100  |
| C | 2.57982600  | 0.66524600  | 0.13416200  |
| C | 1.98389500  | -0.63814500 | -0.50826100 |
| C | 2.58309300  | -1.84887400 | 0.26113300  |
| C | 4.11515600  | -1.82425800 | 0.33551100  |
| O | 6.07005700  | -0.57256500 | 1.08338800  |
| C | 0.43457100  | -0.59558700 | -0.21080300 |
| C | 1.89952000  | 1.92349300  | -0.43317300 |
| C | 0.38954500  | 1.94306400  | -0.14012200 |
| C | -0.34407100 | 0.68349400  | -0.67439100 |
| C | -1.79667700 | 0.52341400  | -0.06208900 |
| C | -2.59051700 | -0.73171000 | -0.63290500 |
| C | -1.63265400 | -1.91217400 | -0.88637200 |
| C | -0.31166600 | -1.82985300 | -0.65619900 |
| C | -3.49865800 | -0.47950500 | -1.85388200 |
| C | -3.46242700 | -1.20458600 | 0.56313700  |
| C | -1.80305500 | 0.26644100  | 1.49370900  |
| C | -2.86876900 | -0.74746600 | 1.88153300  |
| O | -4.46122100 | -1.88370300 | 0.45280000  |
| O | -1.07443800 | 0.80756700  | 2.29674300  |

|   |             |             |             |
|---|-------------|-------------|-------------|
| C | 2.27772500  | -0.82511100 | -2.01824300 |
| C | -0.44929900 | 0.79921700  | -2.21740800 |
| C | 4.53123600  | 1.95151100  | 1.14197300  |
| C | 4.86048300  | 0.95803000  | -1.11575900 |
| C | -2.33946100 | -1.89300000 | 2.76312800  |
| C | -2.66356700 | 1.78458300  | -0.24486400 |
| O | -2.44641300 | 2.73911500  | -0.95416400 |
| O | -3.77775200 | 1.69698200  | 0.52716800  |
| C | -4.68971600 | 2.80912300  | 0.44551800  |
| C | -2.24353300 | -3.19303400 | -1.41198200 |
| H | 4.29014400  | -0.47979800 | 1.99208300  |
| H | 2.25666000  | 0.61075700  | 1.18748700  |
| H | 2.18530000  | -1.85169300 | 1.28627700  |
| H | 2.26597100  | -2.79465900 | -0.19470700 |
| H | 4.47372400  | -2.66866400 | 0.93626600  |
| H | 4.55130500  | -1.95782500 | -0.66514600 |
| H | 6.43568700  | -0.74045000 | 0.20039600  |
| H | 0.40700200  | -0.57203300 | 0.88754400  |
| H | 2.33508100  | 2.82048400  | 0.01889600  |
| H | 2.08773300  | 2.01353900  | -1.51009900 |
| H | -0.05820900 | 2.83681600  | -0.58381500 |
| H | 0.25048300  | 2.01500300  | 0.94126700  |
| H | 0.27233100  | -2.73006300 | -0.83519900 |
| H | -2.92132000 | -0.32301700 | -2.76690900 |
| H | -4.15700800 | -1.33944900 | -1.99382200 |
| H | -4.14336600 | 0.38991800  | -1.69839700 |
| H | -3.64861300 | -0.21238000 | 2.43705400  |
| H | 2.30239200  | 0.11443000  | -2.57311400 |
| H | 3.23894100  | -1.31824100 | -2.18435200 |
| H | 1.51457800  | -1.45902100 | -2.48230500 |
| H | -0.67053800 | -0.15697100 | -2.69535800 |
| H | -1.22100200 | 1.51977700  | -2.49080000 |
| H | 0.48733300  | 1.16558300  | -2.63969500 |
| H | 4.40193500  | 2.91421200  | 0.63676600  |
| H | 5.58309100  | 1.86164500  | 1.42961700  |
| H | 3.93015900  | 1.96906300  | 2.05979000  |
| H | 4.78951800  | 0.09442000  | -1.78242800 |
| H | 4.44770200  | 1.81901500  | -1.65166400 |
| H | 5.92344400  | 1.16806400  | -0.94887400 |
| H | -3.15946300 | -2.56898700 | 3.02144100  |
| H | -1.90852600 | -1.48093200 | 3.67988500  |
| H | -1.56686900 | -2.46716200 | 2.24254700  |
| H | -5.50546500 | 2.56542800  | 1.12591000  |
| H | -4.19001500 | 3.73088500  | 0.75206300  |
| H | -5.06037600 | 2.92287200  | -0.57607800 |
| H | -2.57658600 | -3.07749900 | -2.45136000 |
| H | -1.50821300 | -4.00321100 | -1.39009800 |
| H | -3.12038500 | -3.50253000 | -0.83407700 |

## AN-EN

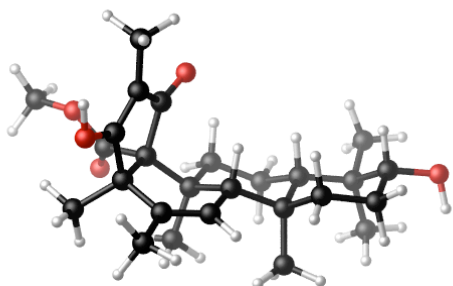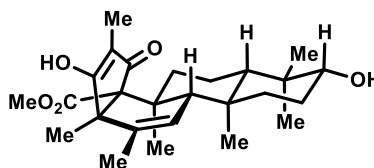

### B3LYP/6-31+G(d,p)//B3LYP/6-31G\*

|                                              |                             |
|----------------------------------------------|-----------------------------|
| Zero-point correction=                       | 0.602439 (Hartree/Particle) |
| Thermal correction to Energy=                | 0.633785                    |
| Thermal correction to Enthalpy=              | 0.634729                    |
| Thermal correction to Gibbs Free Energy=     | 0.544990                    |
| Sum of electronic and zero-point Energies=   | -1389.239263                |
| Sum of electronic and thermal Energies=      | -1389.207917                |
| Sum of electronic and thermal Enthalpies=    | -1389.206973                |
| Sum of electronic and thermal Free Energies= | -1389.296712                |

### MPW1PW91/6-31+G(d,p)//B3LYP/G-31G\*

|                                              |                             |
|----------------------------------------------|-----------------------------|
| Zero-point correction=                       | 0.605409 (Hartree/Particle) |
| Thermal correction to Energy=                | 0.636079                    |
| Thermal correction to Enthalpy=              | 0.637024                    |
| Thermal correction to Gibbs Free Energy=     | 0.550174                    |
| Sum of electronic and zero-point Energies=   | -1388.930500                |
| Sum of electronic and thermal Energies=      | -1388.899830                |
| Sum of electronic and thermal Enthalpies=    | -1388.898885                |
| Sum of electronic and thermal Free Energies= | -1388.985735                |

|   |             |             |             |
|---|-------------|-------------|-------------|
| C | -4.61173000 | 0.45515000  | 1.08696400  |
| C | -4.12848200 | -0.76877300 | 0.25064500  |
| C | -2.57171900 | -0.65482200 | 0.08998700  |
| C | -2.01012700 | 0.70188500  | -0.46323600 |
| C | -2.58802800 | 1.84274900  | 0.42069400  |
| C | -4.11594400 | 1.79842500  | 0.54906900  |
| O | -6.02996700 | 0.47207400  | 1.27494100  |
| C | -0.45064700 | 0.66127800  | -0.22972500 |
| C | -1.91130400 | -1.84928400 | -0.62014200 |
| C | -0.39439400 | -1.88575300 | -0.37648100 |
| C | 0.32832400  | -0.57779300 | -0.79989800 |
| C | 1.77301500  | -0.47768500 | -0.15715800 |
| C | 2.54767100  | 0.87167100  | -0.53708200 |
| C | 1.57602400  | 2.03193500  | -0.85752600 |
| C | 0.25653400  | 1.92255500  | -0.65596800 |
| C | 3.60906800  | 0.71486500  | -1.64968700 |
| C | 3.19048200  | 1.23485800  | 0.79399900  |
| C | 1.77351700  | -0.43647900 | 1.42156200  |
| C | 2.70431600  | 0.58680800  | 1.87419000  |
| O | 4.13738600  | 2.19567300  | 0.78053900  |

|   |             |             |             |
|---|-------------|-------------|-------------|
| O | 1.13942800  | -1.18307900 | 2.15385500  |
| C | -2.36699500 | 0.99919500  | -1.94327700 |
| C | 0.42209700  | -0.55609600 | -2.34878600 |
| C | -4.47202000 | -2.03375400 | 1.07222800  |
| C | -4.90199900 | -0.86402500 | -1.08263800 |
| C | 3.05417700  | 0.77811900  | 3.31909300  |
| C | 2.64613700  | -1.70715000 | -0.50772500 |
| O | 2.43429000  | -2.53332700 | -1.36777200 |
| O | 3.73223500  | -1.78923500 | 0.29997900  |
| C | 4.58350600  | -2.92588800 | 0.07304200  |
| C | 2.16687700  | 3.32980700  | -1.36429100 |
| H | -4.21351400 | 0.32877100  | 2.10268500  |
| H | -2.20060400 | -0.69185200 | 1.12810700  |
| H | -2.15232000 | 1.76687200  | 1.42735500  |
| H | -2.28995100 | 2.82390300  | 0.03081500  |
| H | -4.45892000 | 2.59066600  | 1.22536800  |
| H | -4.59019200 | 2.00183700  | -0.42196000 |
| H | -6.43102800 | 0.69404100  | 0.41973000  |
| H | -0.36525900 | 0.58134800  | 0.86420900  |
| H | -2.32920600 | -2.78874500 | -0.24349900 |
| H | -2.13488900 | -1.83435400 | -1.69405800 |
| H | 0.04380400  | -2.72738500 | -0.92107600 |
| H | -0.22126900 | -2.06670300 | 0.68676100  |
| H | -0.35026900 | 2.80357100  | -0.85313400 |
| H | 3.13928400  | 0.44005800  | -2.59777600 |
| H | 4.15601600  | 1.64915200  | -1.79322800 |
| H | 4.34298800  | -0.05125200 | -1.38886300 |
| H | -2.43035700 | 0.10110100  | -2.56095400 |
| H | -3.32795700 | 1.51339300  | -2.03037900 |
| H | -1.61725600 | 1.65408000  | -2.39916700 |
| H | 0.71597900  | 0.41887400  | -2.74341600 |
| H | 1.13355400  | -1.30653200 | -2.69212300 |
| H | -0.54452300 | -0.80475600 | -2.79022200 |
| H | -4.35707600 | -2.95146700 | 0.48638500  |
| H | -5.51204500 | -1.97766300 | 1.40796800  |
| H | -3.83352100 | -2.11907600 | 1.96029800  |
| H | -4.86696300 | 0.05430500  | -1.67472100 |
| H | -4.50559200 | -1.67049700 | -1.70797900 |
| H | -5.95488100 | -1.10059600 | -0.88903200 |
| H | 3.95319200  | 0.21474400  | 3.60348100  |
| H | 2.23297800  | 0.40535400  | 3.93851700  |
| H | 3.22019200  | 1.83271500  | 3.57823600  |
| H | 5.37930600  | -2.84368700 | 0.81380700  |
| H | 4.02347200  | -3.85414600 | 0.20922400  |
| H | 4.99493500  | -2.90329800 | -0.93959500 |
| H | 2.56862000  | 3.22367000  | -2.38030600 |
| H | 1.39599600  | 4.10617300  | -1.39769400 |
| H | 2.98726400  | 3.68877200  | -0.73405300 |
| H | 4.44289500  | 2.35098700  | 1.69081300  |



## AN-ES

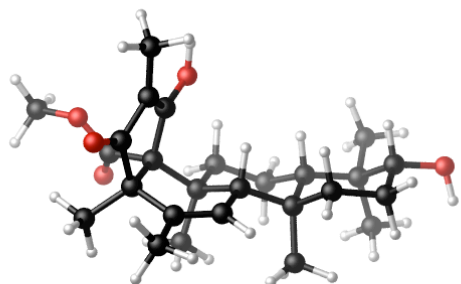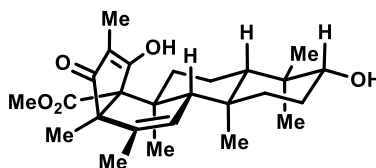

### B3LYP/6-31+G(d,p)//B3LYP/6-31G\*

|                                              |                             |
|----------------------------------------------|-----------------------------|
| Zero-point correction=                       | 0.602349 (Hartree/Particle) |
| Thermal correction to Energy=                | 0.633706                    |
| Thermal correction to Enthalpy=              | 0.634650                    |
| Thermal correction to Gibbs Free Energy=     | 0.545025                    |
| Sum of electronic and zero-point Energies=   | -1389.241087                |
| Sum of electronic and thermal Energies=      | -1389.209731                |
| Sum of electronic and thermal Enthalpies=    | -1389.208786                |
| Sum of electronic and thermal Free Energies= | -1389.298411                |

### MPW1PW91/6-31+G(d,p)//B3LYP/G-31G\*

|                                              |                             |
|----------------------------------------------|-----------------------------|
| Zero-point correction=                       | 0.605280 (Hartree/Particle) |
| Thermal correction to Energy=                | 0.635984                    |
| Thermal correction to Enthalpy=              | 0.636928                    |
| Thermal correction to Gibbs Free Energy=     | 0.550040                    |
| Sum of electronic and zero-point Energies=   | -1388.932704                |
| Sum of electronic and thermal Energies=      | -1388.902001                |
| Sum of electronic and thermal Enthalpies=    | -1388.901056                |
| Sum of electronic and thermal Free Energies= | -1388.987945                |

|   |             |             |             |
|---|-------------|-------------|-------------|
| C | -4.61432700 | 0.43102600  | 1.06142500  |
| C | -4.11995100 | -0.77997900 | 0.21272500  |
| C | -2.56179000 | -0.66043900 | 0.07119800  |
| C | -1.99598500 | 0.70444600  | -0.45725700 |
| C | -2.58738900 | 1.83204200  | 0.43477200  |
| C | -4.11652100 | 1.78243100  | 0.54674300  |
| O | -6.03365000 | 0.44024800  | 1.23739600  |
| C | -0.43775000 | 0.66636100  | -0.20854800 |
| C | -1.89138700 | -1.84556000 | -0.64527500 |
| C | -0.37755200 | -1.88140100 | -0.38031500 |
| C | 0.34590400  | -0.56665200 | -0.78030900 |
| C | 1.79861200  | -0.45708600 | -0.14001400 |
| C | 2.56448900  | 0.88113100  | -0.57178800 |
| C | 1.58683300  | 2.03708300  | -0.84696000 |
| C | 0.27025500  | 1.93389500  | -0.61553700 |
| C | 3.60108100  | 0.72410100  | -1.69846700 |
| C | 3.26497000  | 1.32573700  | 0.74451600  |
| C | 1.82892900  | -0.31990900 | 1.38589100  |
| C | 2.62031500  | 0.66148000  | 1.86989000  |
| O | 4.18935200  | 2.12330500  | 0.80315300  |

|   |             |             |             |
|---|-------------|-------------|-------------|
| O | 1.16888800  | -1.23688200 | 2.12838800  |
| C | -2.33596500 | 1.02140500  | -1.93709800 |
| C | 0.44948400  | -0.53589800 | -2.32858600 |
| C | -4.47127000 | -2.05709900 | 1.01172800  |
| C | -4.87763000 | -0.85664400 | -1.13071100 |
| C | 2.95380400  | 0.96211400  | 3.30011900  |
| C | 2.67297300  | -1.69570900 | -0.48200000 |
| O | 2.47660900  | -2.50461200 | -1.36174200 |
| O | 3.74358200  | -1.78185000 | 0.34024900  |
| C | 4.63325600  | -2.88222900 | 0.08120600  |
| C | 2.18768900  | 3.34108700  | -1.32081400 |
| H | -4.22455100 | 0.29148800  | 2.07895300  |
| H | -2.20350500 | -0.70974400 | 1.11404500  |
| H | -2.16245200 | 1.74511300  | 1.44537200  |
| H | -2.28751100 | 2.81839800  | 0.06102800  |
| H | -4.46795500 | 2.56479800  | 1.23007800  |
| H | -4.58138900 | 1.99785400  | -0.42605300 |
| H | -6.42867400 | 0.68581500  | 0.38581400  |
| H | -0.36261000 | 0.57724500  | 0.88762000  |
| H | -2.31345500 | -2.79060100 | -0.28769200 |
| H | -2.09837400 | -1.81627200 | -1.72152600 |
| H | 0.07290000  | -2.71641100 | -0.92502200 |
| H | -0.23307900 | -2.08328900 | 0.68328100  |
| H | 3.12829600  | 0.51385800  | -2.66142400 |
| H | 4.18479600  | 1.64308200  | -1.78237000 |
| H | 4.30970800  | -0.07771500 | -1.47563100 |
| H | -2.38519800 | 0.13300300  | -2.56988200 |
| H | -3.29889100 | 1.53098800  | -2.02900900 |
| H | -1.58382700 | 1.68807800  | -2.37082000 |
| H | 0.72331300  | 0.44757400  | -2.71385800 |
| H | 1.17910800  | -1.26794000 | -2.67251800 |
| H | -0.50902200 | -0.80312700 | -2.77619500 |
| H | -4.34712400 | -2.96653500 | 0.41499100  |
| H | -5.51545000 | -2.00748000 | 1.33504600  |
| H | -3.84444800 | -2.15320800 | 1.90730500  |
| H | -4.83235000 | 0.06881400  | -1.71031800 |
| H | -4.47636500 | -1.65649600 | -1.76147800 |
| H | -5.93335600 | -1.09210800 | -0.95232400 |
| H | 3.85306800  | 1.58487900  | 3.32630200  |
| H | 3.16045100  | 0.05485700  | 3.88619700  |
| H | 2.15344400  | 1.51528000  | 3.80918800  |
| H | 5.42109500  | -2.79925100 | 0.83004900  |
| H | 4.10249700  | -3.83251200 | 0.17883900  |
| H | 5.05023000  | -2.80916700 | -0.92654100 |
| H | 2.55339100  | 3.26373200  | -2.35295400 |
| H | 1.43758800  | 4.13788100  | -1.29556800 |
| H | 1.34887000  | -1.06367900 | 3.06875400  |
| H | 3.03976800  | 3.64140100  | -0.70186300 |
| H | -0.33366000 | 2.82532300  | -0.76857000 |

## TE-DK

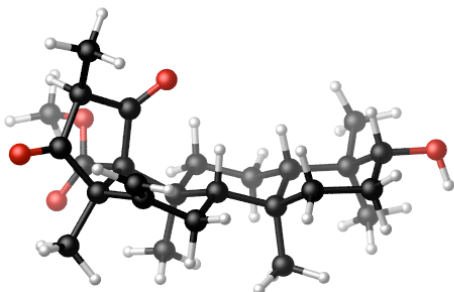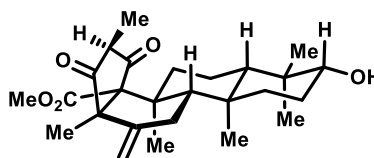

### B3LYP/6-31+G(d,p)//B3LYP/6-31G\*

|                                              |                             |
|----------------------------------------------|-----------------------------|
| Zero-point correction=                       | 0.602371 (Hartree/Particle) |
| Thermal correction to Energy=                | 0.633530                    |
| Thermal correction to Enthalpy=              | 0.634475                    |
| Thermal correction to Gibbs Free Energy=     | 0.544866                    |
| Sum of electronic and zero-point Energies=   | -1389.230311                |
| Sum of electronic and thermal Energies=      | -1389.199152                |
| Sum of electronic and thermal Enthalpies=    | -1389.198208                |
| Sum of electronic and thermal Free Energies= | -1389.287817                |

### MPW1PW91/6-31+G(d,p)//B3LYP/G-31G\*

|                                              |                             |
|----------------------------------------------|-----------------------------|
| Zero-point correction=                       | 0.605029 (Hartree/Particle) |
| Thermal correction to Energy=                | 0.635660                    |
| Thermal correction to Enthalpy=              | 0.636604                    |
| Thermal correction to Gibbs Free Energy=     | 0.549367                    |
| Sum of electronic and zero-point Energies=   | -1388.920835                |
| Sum of electronic and thermal Energies=      | -1388.890204                |
| Sum of electronic and thermal Enthalpies=    | -1388.889260                |
| Sum of electronic and thermal Free Energies= | -1388.976497                |

|   |             |             |             |
|---|-------------|-------------|-------------|
| C | 4.57453700  | -0.60103300 | 1.01172000  |
| C | 4.06210600  | 0.72592300  | 0.37422300  |
| C | 2.51357900  | 0.58358900  | 0.16302200  |
| C | 2.00612700  | -0.68214300 | -0.61999500 |
| C | 2.62311000  | -1.93426100 | 0.06618800  |
| C | 4.14449500  | -1.85148400 | 0.24441200  |
| O | 5.98723300  | -0.59734100 | 1.23406400  |
| C | 0.44275100  | -0.73081800 | -0.39504400 |
| C | 1.82675000  | 1.86009100  | -0.35297400 |
| C | 0.30702400  | 1.80688600  | -0.13607000 |
| C | -0.36137400 | 0.55977800  | -0.77918300 |
| C | -1.83337600 | 0.37488800  | -0.18823300 |
| C | -2.61608200 | -0.92328300 | -0.69168000 |
| C | -1.68077400 | -2.14025000 | -0.50352600 |
| C | -0.25211100 | -1.97977300 | -0.98016900 |
| C | -3.21382400 | -0.95938000 | -2.11126300 |
| C | -3.73746600 | -1.05269900 | 0.36498600  |
| C | -1.91276200 | 0.13070100  | 1.36247200  |
| C | -3.29873100 | -0.41677900 | 1.68133400  |
| O | -4.80650500 | -1.59396800 | 0.18305900  |

|   |             |             |             |
|---|-------------|-------------|-------------|
| O | -1.03554400 | 0.28088800  | 2.18290100  |
| C | 2.39584700  | -0.71665600 | -2.11880900 |
| C | -0.42519800 | 0.80743500  | -2.30914100 |
| C | 4.34346300  | 1.84950300  | 1.39950100  |
| C | 4.85363500  | 1.06654800  | -0.90728300 |
| C | -3.37807900 | -1.32989300 | 2.90787000  |
| C | -2.64819200 | 1.66125500  | -0.45066300 |
| O | -3.17983800 | 1.98454500  | -1.49102400 |
| O | -2.68497900 | 2.44827900  | 0.64960000  |
| C | -3.37522500 | 3.70386200  | 0.50047100  |
| C | -2.10917200 | -3.30838200 | -0.00894800 |
| H | 4.14879400  | -0.65849200 | 2.02254300  |
| H | 2.12603400  | 0.43542300  | 1.18433400  |
| H | 2.16345100  | -2.06077200 | 1.05699400  |
| H | 2.38464700  | -2.84007400 | -0.50397200 |
| H | 4.50372700  | -2.73297000 | 0.78891600  |
| H | 4.64917100  | -1.87319800 | -0.73250100 |
| H | 6.41620000  | -0.68312100 | 0.36797100  |
| H | 0.34914300  | -0.81749100 | 0.69155300  |
| H | 2.20747200  | 2.73631200  | 0.18165400  |
| H | 2.06567200  | 2.03020700  | -1.40968100 |
| H | -0.14898800 | 2.71678300  | -0.54987200 |
| H | 0.11525200  | 1.81397600  | 0.93852000  |
| H | 0.29669100  | -2.88486800 | -0.70741800 |
| H | -0.24877700 | -1.94271000 | -2.07707000 |
| H | -2.44954200 | -1.13124800 | -2.87157700 |
| H | -3.92349400 | -1.79024500 | -2.14497300 |
| H | -3.73963900 | -0.03596900 | -2.35353700 |
| H | -3.95155500 | 0.45426000  | 1.84413300  |
| H | 2.37988000  | 0.26465500  | -2.59678000 |
| H | 3.40093900  | -1.12119100 | -2.26308500 |
| H | 1.72065400  | -1.36582200 | -2.68528300 |
| H | -0.59949000 | -0.09793900 | -2.89177900 |
| H | -1.22053000 | 1.51111000  | -2.56038000 |
| H | 0.51245300  | 1.23984900  | -2.66205000 |
| H | 4.20841700  | 2.84724300  | 0.96931300  |
| H | 5.37801900  | 1.77192600  | 1.74697500  |
| H | 3.68590900  | 1.76656500  | 2.27384200  |
| H | 4.86910100  | 0.25626300  | -1.64095100 |
| H | 4.43388700  | 1.94805700  | -1.40312100 |
| H | 5.89189500  | 1.30972500  | -0.65285400 |
| H | -4.40268600 | -1.68951000 | 3.03737700  |
| H | -3.07116800 | -0.78388700 | 3.80392000  |
| H | -2.71621900 | -2.19288800 | 2.79070300  |
| H | -3.30549200 | 4.18837400  | 1.47411700  |
| H | -2.89411100 | 4.31168300  | -0.26954600 |
| H | -4.41862500 | 3.53502100  | 0.22310000  |
| H | -3.13391800 | -3.48031200 | 0.30269500  |
| H | -1.43247400 | -4.15569700 | 0.06965100  |

## TE-EN

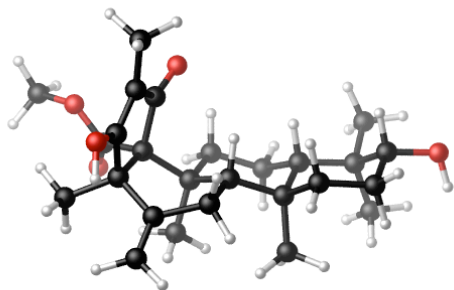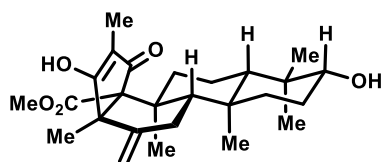

### B3LYP/6-31+G(d,p)//B3LYP/6-31G\*

Zero-point correction= 0.603332 (Hartree/Particle)  
 Thermal correction to Energy= 0.634352  
 Thermal correction to Enthalpy= 0.635296  
 Thermal correction to Gibbs Free Energy= 0.545950  
 Sum of electronic and zero-point Energies= -1389.230618  
 Sum of electronic and thermal Energies= -1389.199597  
 Sum of electronic and thermal Enthalpies= -1389.198653  
 Sum of electronic and thermal Free Energies= -1389.287999

### MPW1PW91/6-31+G(d,p)//B3LYP/G-31G\*

Zero-point correction= 0.606160 (Hartree/Particle)  
 Thermal correction to Energy= 0.636553  
 Thermal correction to Enthalpy= 0.637497  
 Thermal correction to Gibbs Free Energy= 0.551009  
 Sum of electronic and zero-point Energies= -1388.922589  
 Sum of electronic and thermal Energies= -1388.892197  
 Sum of electronic and thermal Enthalpies= -1388.891253  
 Sum of electronic and thermal Free Energies= -1388.977741

|   |             |             |             |
|---|-------------|-------------|-------------|
| C | 4.57247500  | -0.40604500 | 1.05675200  |
| C | 4.06899100  | 0.81005600  | 0.22039200  |
| C | 2.51182900  | 0.67806500  | 0.07431600  |
| C | 1.96042600  | -0.68776300 | -0.46821600 |
| C | 2.56201400  | -1.82117900 | 0.40896500  |
| C | 4.09008000  | -1.75724900 | 0.52546500  |
| O | 5.99161900  | -0.40500400 | 1.23572100  |
| C | 0.40500000  | -0.66709200 | -0.20668400 |
| C | 1.82988500  | 1.85864900  | -0.63883200 |
| C | 0.31226200  | 1.86728200  | -0.39673100 |
| C | -0.39322600 | 0.54211100  | -0.79969800 |
| C | -1.83914600 | 0.46079800  | -0.13393500 |
| C | -2.60909400 | -0.88986100 | -0.50508100 |
| C | -1.67719200 | -1.94759400 | -1.10778100 |
| C | -0.28183500 | -2.03291300 | -0.51742800 |
| C | -3.88351000 | -0.67682300 | -1.35192300 |
| C | -2.98946500 | -1.44582500 | 0.86643300  |
| C | -1.80300800 | 0.41334200  | 1.44433100  |
| C | -2.56623000 | -0.73097700 | 1.92753200  |
| O | -3.67837800 | -2.60019100 | 0.95133500  |
| O | -1.21868100 | 1.21722200  | 2.15572900  |

|   |             |             |             |
|---|-------------|-------------|-------------|
| C | 2.31693100  | -0.96952200 | -1.95224500 |
| C | -0.49621000 | 0.50645300  | -2.34793600 |
| C | 4.40372200  | 2.08202800  | 1.03463700  |
| C | 4.83239300  | 0.90938200  | -1.11836900 |
| C | -2.75763200 | -1.02022600 | 3.38268800  |
| C | -2.70325800 | 1.69536500  | -0.47850000 |
| O | -2.58387000 | 2.43483200  | -1.43098000 |
| O | -3.67179400 | 1.88061300  | 0.44913900  |
| C | -4.51517900 | 3.02817200  | 0.24743300  |
| C | -2.09040500 | -2.84974600 | -2.01120100 |
| H | 4.17911300  | -0.28199200 | 2.07463000  |
| H | 2.15097300  | 0.71767100  | 1.11564300  |
| H | 2.13546300  | -1.75062500 | 1.42017100  |
| H | 2.26933900  | -2.80418000 | 0.01909300  |
| H | 4.44813900  | -2.54317300 | 1.20121700  |
| H | 4.56014100  | -1.95719300 | -0.44833300 |
| H | 6.39065300  | -0.62481700 | 0.37900800  |
| H | 0.34358800  | -0.52937000 | 0.87877000  |
| H | 2.22991600  | 2.80657000  | -0.26397500 |
| H | 2.05411000  | 1.84610200  | -1.71261200 |
| H | -0.14130200 | 2.69336200  | -0.95397900 |
| H | 0.13467300  | 2.06145900  | 0.66368100  |
| H | -0.33733800 | -2.61014900 | 0.41491800  |
| H | 0.32540600  | -2.63563600 | -1.19831400 |
| H | -3.63150300 | -0.30681900 | -2.34960800 |
| H | -4.44902800 | -1.60600600 | -1.46669400 |
| H | -4.55048300 | 0.03693100  | -0.86524500 |
| H | 2.40015000  | -0.06235700 | -2.55366700 |
| H | 3.26992700  | -1.49790200 | -2.04152700 |
| H | 1.56586700  | -1.60304700 | -2.43385700 |
| H | -0.77138600 | -0.47245000 | -2.74513100 |
| H | -1.22795000 | 1.23800300  | -2.68984300 |
| H | 0.46320300  | 0.77560500  | -2.79305200 |
| H | 4.27032900  | 2.99597700  | 0.44676500  |
| H | 5.44771400  | 2.04116600  | 1.35995300  |
| H | 3.77339700  | 2.16180200  | 1.92899600  |
| H | 4.80553100  | -0.01174600 | -1.70645600 |
| H | 4.42289800  | 1.70867700  | -1.74448400 |
| H | 5.88336500  | 1.15947800  | -0.93191700 |
| H | -2.99685200 | -2.07420800 | 3.55145200  |
| H | -3.57274700 | -0.41632600 | 3.80146000  |
| H | -1.85109000 | -0.75909700 | 3.93822000  |
| H | -5.21223600 | 3.02495100  | 1.08546300  |
| H | -3.91718600 | 3.94256900  | 0.24612200  |
| H | -5.05082100 | 2.95017200  | -0.70246300 |
| H | -3.07370000 | -2.83561600 | -2.46892800 |
| H | -1.41534800 | -3.62479300 | -2.36613700 |
| H | -3.59981300 | -3.06609400 | 0.09680200  |

## TE-ES

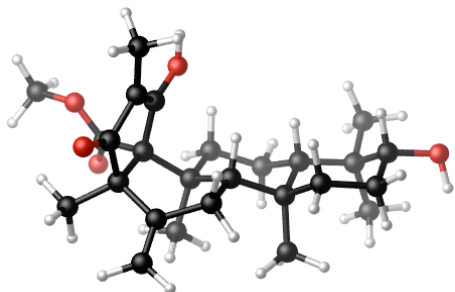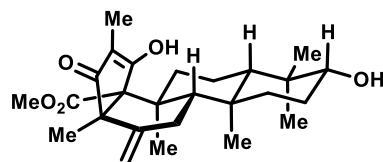

### B3LYP/6-31+G(d,p)//B3LYP/6-31G\*

|                                              |                             |
|----------------------------------------------|-----------------------------|
| Zero-point correction=                       | 0.602968 (Hartree/Particle) |
| Thermal correction to Energy=                | 0.634071                    |
| Thermal correction to Enthalpy=              | 0.635015                    |
| Thermal correction to Gibbs Free Energy=     | 0.545535                    |
| Sum of electronic and zero-point Energies=   | -1389.228592                |
| Sum of electronic and thermal Energies=      | -1389.197490                |
| Sum of electronic and thermal Enthalpies=    | -1389.196546                |
| Sum of electronic and thermal Free Energies= | -1389.286026                |

### MPW1PW91/6-31+G(d,p)//B3LYP/G-31G\*

|                                              |                             |
|----------------------------------------------|-----------------------------|
| Zero-point correction=                       | 0.605800 (Hartree/Particle) |
| Thermal correction to Energy=                | 0.636287                    |
| Thermal correction to Enthalpy=              | 0.637231                    |
| Thermal correction to Gibbs Free Energy=     | 0.550541                    |
| Sum of electronic and zero-point Energies=   | -1388.920240                |
| Sum of electronic and thermal Energies=      | -1388.889753                |
| Sum of electronic and thermal Enthalpies=    | -1388.888809                |
| Sum of electronic and thermal Free Energies= | -1388.975498                |

|   |             |             |             |
|---|-------------|-------------|-------------|
| C | 4.60149600  | -0.36178400 | 1.06106700  |
| C | 4.08635600  | 0.81555900  | 0.17752200  |
| C | 2.52727000  | 0.67674800  | 0.06112600  |
| C | 1.96901800  | -0.71085900 | -0.41651900 |
| C | 2.58264600  | -1.80283300 | 0.50381400  |
| C | 4.11230500  | -1.73509500 | 0.59744900  |
| O | 6.02254000  | -0.35106900 | 1.22212800  |
| C | 0.41732200  | -0.67858800 | -0.14013000 |
| C | 1.83282100  | 1.83031100  | -0.68390300 |
| C | 0.31652400  | 1.84310400  | -0.42534000 |
| C | -0.38336900 | 0.50165300  | -0.78232400 |
| C | -1.84472100 | 0.41328900  | -0.13747000 |
| C | -2.62492800 | -0.92461900 | -0.56253400 |
| C | -1.64684900 | -2.00275100 | -1.03926800 |
| C | -0.28726400 | -2.05220300 | -0.36547600 |
| C | -3.79295200 | -0.71675300 | -1.53857900 |
| C | -3.19807400 | -1.46222000 | 0.78658600  |
| C | -1.85719100 | 0.28139300  | 1.38667100  |
| C | -2.58328200 | -0.74133500 | 1.89092300  |
| O | -4.02979900 | -2.35088900 | 0.86555000  |

|   |             |             |             |
|---|-------------|-------------|-------------|
| O | -1.22318200 | 1.22435800  | 2.11618600  |
| C | 2.30430800  | -1.06156200 | -1.89009300 |
| C | -0.47765800 | 0.42234100  | -2.32984700 |
| C | 4.43502600  | 2.12266600  | 0.92713400  |
| C | 4.82808500  | 0.85196000  | -1.17659800 |
| C | -2.85586600 | -1.05417500 | 3.33228800  |
| C | -2.69860200 | 1.65856200  | -0.49053500 |
| O | -2.57329700 | 2.37370100  | -1.45998400 |
| O | -3.66779400 | 1.86760900  | 0.43049200  |
| C | -4.53351000 | 2.98700900  | 0.17090500  |
| C | -1.98585100 | -2.93997200 | -1.93196500 |
| H | 4.22085900  | -0.19185100 | 2.07742800  |
| H | 2.18444500  | 0.75643900  | 1.10709700  |
| H | 2.16998900  | -1.68517800 | 1.51677400  |
| H | 2.28335500  | -2.80195700 | 0.16497900  |
| H | 4.47885100  | -2.49013000 | 1.30324700  |
| H | 4.56997000  | -1.97892200 | -0.37199100 |
| H | 6.41125500  | -0.62310900 | 0.37572000  |
| H | 0.37133900  | -0.48271500 | 0.93824400  |
| H | 2.23502700  | 2.79196700  | -0.34810300 |
| H | 2.04263500  | 1.78036400  | -1.75886300 |
| H | -0.14582700 | 2.65122400  | -1.00077900 |
| H | 0.16245500  | 2.07782100  | 0.63075500  |
| H | -0.40474300 | -2.54136400 | 0.61113700  |
| H | 0.34414300  | -2.72545000 | -0.95206300 |
| H | -3.44324800 | -0.44430400 | -2.53797200 |
| H | -4.37428400 | -1.63939700 | -1.59802700 |
| H | -4.47493400 | 0.05798200  | -1.17854000 |
| H | 2.37286200  | -0.18479100 | -2.53669400 |
| H | 3.25803900  | -1.59013200 | -1.97068700 |
| H | 1.54645400  | -1.72056100 | -2.32402600 |
| H | -0.72623200 | -0.57409900 | -2.69567600 |
| H | -1.22647700 | 1.12529000  | -2.69388500 |
| H | 0.47545600  | 0.70610400  | -2.77865900 |
| H | 4.29093000  | 3.00941500  | 0.30141200  |
| H | 5.48438700  | 2.09584100  | 1.23597100  |
| H | 3.82065600  | 2.24191100  | 1.82856400  |
| H | 4.78336000  | -0.09271900 | -1.72424100 |
| H | 4.41419700  | 1.62754400  | -1.82921200 |
| H | 5.88400500  | 1.10075800  | -1.01837100 |
| H | -3.64803200 | -1.80698300 | 3.38300200  |
| H | -3.19722000 | -0.17357100 | 3.89539600  |
| H | -1.97635200 | -1.46202700 | 3.84827600  |
| H | -5.24002200 | 3.00470100  | 1.00096000  |
| H | -3.95657200 | 3.91434200  | 0.13254500  |
| H | -5.05777700 | 2.85380600  | -0.77883400 |
| H | -2.95750900 | -2.98648000 | -2.40874600 |
| H | -1.27934000 | -3.71821500 | -2.21059100 |
| H | -1.38221500 | 1.04968400  | 3.06002300  |



## PAC-DK

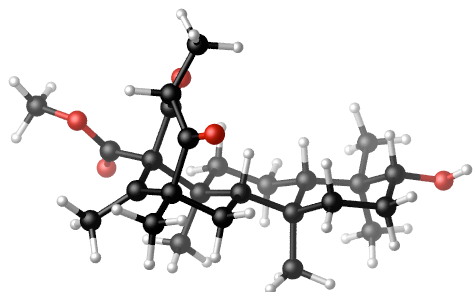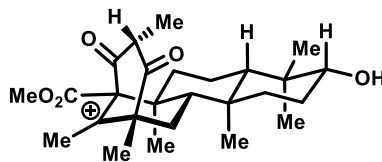

### B3LYP/6-31+G(d,p)//B3LYP/6-31G\*

|                                              |                             |
|----------------------------------------------|-----------------------------|
| Zero-point correction=                       | 0.611808 (Hartree/Particle) |
| Thermal correction to Energy=                | 0.643649                    |
| Thermal correction to Enthalpy=              | 0.644593                    |
| Thermal correction to Gibbs Free Energy=     | 0.553703                    |
| Sum of electronic and zero-point Energies=   | -1389.564292                |
| Sum of electronic and thermal Energies=      | -1389.532451                |
| Sum of electronic and thermal Enthalpies=    | -1389.531506                |
| Sum of electronic and thermal Free Energies= | -1389.622397                |

### MPW1PW91/6-31+G(d,p)//B3LYP/G-31G\*

|                                              |                             |
|----------------------------------------------|-----------------------------|
| Zero-point correction=                       | 0.614545 (Hartree/Particle) |
| Thermal correction to Energy=                | 0.645793                    |
| Thermal correction to Enthalpy=              | 0.646737                    |
| Thermal correction to Gibbs Free Energy=     | 0.558566                    |
| Sum of electronic and zero-point Energies=   | -1389.254526                |
| Sum of electronic and thermal Energies=      | -1389.223278                |
| Sum of electronic and thermal Enthalpies=    | -1389.222334                |
| Sum of electronic and thermal Free Energies= | -1389.310504                |

|   |             |             |             |
|---|-------------|-------------|-------------|
| C | -4.47440500 | 0.50986600  | 0.80993200  |
| C | -3.94800000 | -0.88551400 | 0.37506900  |
| C | -2.39293900 | -0.75910300 | 0.18490400  |
| C | -1.88287400 | 0.39379200  | -0.75086500 |
| C | -2.51456600 | 1.72815700  | -0.26461200 |
| C | -4.03979400 | 1.64538800  | -0.12061800 |
| O | -5.89300100 | 0.43010300  | 0.89148700  |
| C | -0.30895500 | 0.48265000  | -0.49066000 |
| C | -1.68849800 | -2.08288300 | -0.14306000 |
| C | -0.16487600 | -1.99933800 | 0.10452700  |
| C | 0.46330900  | -0.85039300 | -0.70385200 |
| C | 2.04410300  | -0.52354300 | -0.07270100 |
| C | 2.53835200  | 0.52214900  | -0.95589600 |
| C | 1.91274800  | 1.84645100  | -0.83597300 |
| C | 0.36236800  | 1.64491000  | -1.21784300 |
| C | 3.57321600  | 0.25805400  | -1.98163700 |
| C | 1.86570100  | 2.33964900  | 0.66789500  |
| C | 1.92201700  | -0.04905900 | 1.42333900  |
| C | 2.33719600  | 1.38184100  | 1.74352200  |
| O | 1.46802200  | 3.45321700  | 0.89376000  |
| O | 1.60898700  | -0.83878500 | 2.27769800  |

|   |             |             |             |
|---|-------------|-------------|-------------|
| C | -2.22152900 | 0.20796500  | -2.25074300 |
| C | 0.64124100  | -1.28005500 | -2.17063000 |
| C | -4.23429600 | -1.86019500 | 1.54342700  |
| C | -4.70934900 | -1.40912300 | -0.86133300 |
| C | 1.97822900  | 1.82298200  | 3.16050800  |
| C | 2.95804800  | -1.77493500 | -0.04492800 |
| O | 2.72583100  | -2.85793200 | -0.52006400 |
| O | 4.09244400  | -1.44521600 | 0.59402900  |
| C | 5.05275200  | -2.52018500 | 0.78576100  |
| C | 2.50037400  | 2.96775700  | -1.70825700 |
| H | -4.05351300 | 0.71163200  | 1.81188200  |
| H | -2.03404900 | -0.47281200 | 1.18835500  |
| H | -2.08259700 | 1.99794400  | 0.71070400  |
| H | -2.26588700 | 2.54390700  | -0.95430500 |
| H | -4.40870000 | 2.60000700  | 0.27828300  |
| H | -4.52716100 | 1.51763700  | -1.09326500 |
| H | -6.22228900 | 1.24808900  | 1.29476500  |
| H | -0.25954800 | 0.69740800  | 0.58652000  |
| H | -2.06045000 | -2.88197200 | 0.50408500  |
| H | -1.90093400 | -2.40496400 | -1.16790500 |
| H | 0.31421500  | -2.94314000 | -0.16426400 |
| H | -0.00696300 | -1.84992100 | 1.17396100  |
| H | -0.09357100 | 2.60510100  | -0.96602800 |
| H | 0.32035300  | 1.53442700  | -2.30403200 |
| H | 3.73038100  | -0.80329700 | -2.17724400 |
| H | 3.36977900  | 0.79000900  | -2.91533700 |
| H | 4.52363800  | 0.67367100  | -1.60251800 |
| H | 3.43868900  | 1.35206900  | 1.62301700  |
| H | -2.18172300 | -0.83063000 | -2.58318100 |
| H | -3.22905100 | 0.56612200  | -2.46586700 |
| H | -1.55034700 | 0.78624900  | -2.89357000 |
| H | 0.93225800  | -0.46576800 | -2.84141000 |
| H | 1.38232400  | -2.07753100 | -2.24329000 |
| H | -0.29768100 | -1.68588500 | -2.54757600 |
| H | -4.06329500 | -2.90421000 | 1.26219200  |
| H | -5.28170400 | -1.76654600 | 1.84116100  |
| H | -3.61171600 | -1.63693200 | 2.41937300  |
| H | -4.69500200 | -0.72174800 | -1.70939200 |
| H | -4.29789700 | -2.36714100 | -1.19761400 |
| H | -5.75731000 | -1.57185200 | -0.59893100 |
| H | 2.36913100  | 2.82484100  | 3.34918700  |
| H | 2.39758200  | 1.12515300  | 3.88763200  |
| H | 0.89371300  | 1.84924200  | 3.29731800  |
| H | 5.88751600  | -2.06478400 | 1.31574900  |
| H | 4.59915400  | -3.31530200 | 1.37986800  |
| H | 5.36900400  | -2.91554600 | -0.18134400 |
| H | 3.56931800  | 3.11424000  | -1.52116700 |
| H | 2.35848200  | 2.76515700  | -2.77380400 |
| H | 1.99013800  | 3.90227600  | -1.46893400 |

## PAC-EN

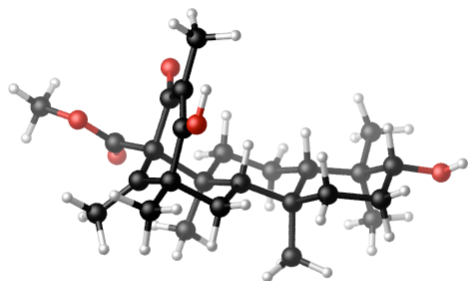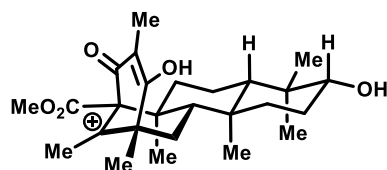

### B3LYP/6-31+G(d,p)//B3LYP/6-31G\*

|                                              |                             |
|----------------------------------------------|-----------------------------|
| Zero-point correction=                       | 0.612772 (Hartree/Particle) |
| Thermal correction to Energy=                | 0.644767                    |
| Thermal correction to Enthalpy=              | 0.645711                    |
| Thermal correction to Gibbs Free Energy=     | 0.554594                    |
| Sum of electronic and zero-point Energies=   | -1389.569135                |
| Sum of electronic and thermal Energies=      | -1389.537140                |
| Sum of electronic and thermal Enthalpies=    | -1389.536196                |
| Sum of electronic and thermal Free Energies= | -1389.627313                |

### MPW1PW91/6-31+G(d,p)//B3LYP/G-31G\*

|                                              |                             |
|----------------------------------------------|-----------------------------|
| Zero-point correction=                       | 0.615652 (Hartree/Particle) |
| Thermal correction to Energy=                | 0.646985                    |
| Thermal correction to Enthalpy=              | 0.647929                    |
| Thermal correction to Gibbs Free Energy=     | 0.559703                    |
| Sum of electronic and zero-point Energies=   | -1389.259588                |
| Sum of electronic and thermal Energies=      | -1389.228255                |
| Sum of electronic and thermal Enthalpies=    | -1389.227310                |
| Sum of electronic and thermal Free Energies= | -1389.315536                |

|   |             |             |             |
|---|-------------|-------------|-------------|
| C | -4.51230900 | 0.53893600  | 0.73757400  |
| C | -3.96619400 | -0.87523600 | 0.39887400  |
| C | -2.40917600 | -0.74185300 | 0.23043800  |
| C | -1.89390900 | 0.34981400  | -0.77453400 |
| C | -2.54255400 | 1.70597000  | -0.38042700 |
| C | -4.06955300 | 1.61897800  | -0.25355600 |
| O | -5.93169100 | 0.45186400  | 0.79782800  |
| C | -0.32324400 | 0.46507400  | -0.50146400 |
| C | -1.68001600 | -2.07639600 | 0.01768900  |
| C | -0.15808400 | -1.94990500 | 0.26833000  |
| C | 0.44509300  | -0.87072000 | -0.64128000 |
| C | 2.08933000  | -0.52081500 | -0.03262900 |
| C | 2.52174400  | 0.49489500  | -0.94230700 |
| C | 1.88816700  | 1.83670500  | -0.80792300 |
| C | 0.35981400  | 1.60394900  | -1.25510200 |
| C | 3.47880800  | 0.22390700  | -2.03900900 |
| C | 1.88520300  | 2.25354400  | 0.66297600  |
| C | 1.97716800  | -0.03205400 | 1.45574700  |
| C | 1.92663400  | 1.39819000  | 1.71536600  |
| O | 1.78309200  | 3.58506900  | 0.79959200  |
| O | 1.96943600  | -0.88666300 | 2.32242100  |

|   |             |             |             |
|---|-------------|-------------|-------------|
| C | -2.21344000 | 0.07024100  | -2.26368900 |
| C | 0.62037600  | -1.40252100 | -2.07067700 |
| C | -4.26564000 | -1.78000600 | 1.61906700  |
| C | -4.69913800 | -1.47956000 | -0.81742300 |
| C | 1.88208500  | 1.86995200  | 3.14996600  |
| C | 2.98850500  | -1.78253700 | -0.00973400 |
| O | 2.68112900  | -2.90236000 | -0.33628800 |
| O | 4.20207400  | -1.42101200 | 0.42992900  |
| C | 5.15320800  | -2.50072900 | 0.62193600  |
| C | 2.49876100  | 2.93883700  | -1.69559300 |
| H | -4.11222800 | 0.80572500  | 1.73302900  |
| H | -2.07500600 | -0.37786400 | 1.21684900  |
| H | -2.12709100 | 2.03939500  | 0.58256900  |
| H | -2.29160500 | 2.47981200  | -1.11620200 |
| H | -4.45303000 | 2.59315800  | 0.07940700  |
| H | -4.53965800 | 1.42741000  | -1.22430100 |
| H | -6.27529900 | 1.29211800  | 1.13834200  |
| H | -0.28948100 | 0.72362200  | 0.56196400  |
| H | -2.04543900 | -2.82674700 | 0.72411900  |
| H | -1.87630900 | -2.48289000 | -0.98010300 |
| H | 0.33628800  | -2.90673200 | 0.09295200  |
| H | -0.00718000 | -1.69649700 | 1.32043500  |
| H | -0.13186900 | 2.56320600  | -1.07588100 |
| H | 0.36656600  | 1.44451200  | -2.33701700 |
| H | 3.65546100  | -0.83815100 | -2.20758400 |
| H | 3.18063000  | 0.70962300  | -2.97270700 |
| H | -2.18952400 | -0.98889700 | -2.52613600 |
| H | -3.20993700 | 0.43204000  | -2.52101800 |
| H | -1.51878700 | 0.59169700  | -2.93027200 |
| H | 0.87745800  | -0.63167500 | -2.80287800 |
| H | 1.37847100  | -2.18615100 | -2.09660900 |
| H | -0.31253800 | -1.86054200 | -2.40062700 |
| H | -4.08127000 | -2.83736600 | 1.40418600  |
| H | -5.31871400 | -1.67829000 | 1.89332200  |
| H | -3.65979400 | -1.49905100 | 2.49020300  |
| H | -4.67751700 | -0.84182400 | -1.70323500 |
| H | -4.26944500 | -2.44990400 | -1.08926100 |
| H | -5.74962800 | -1.64063100 | -0.56414300 |
| H | 2.70261100  | 2.56291800  | 3.37794100  |
| H | 1.98211900  | 1.01238200  | 3.81771100  |
| H | 0.93323900  | 2.36638100  | 3.39345900  |
| H | 6.06500200  | -2.01822100 | 0.97015500  |
| H | 4.76993100  | -3.19667000 | 1.37033000  |
| H | 5.32121900  | -3.02688700 | -0.31983100 |
| H | 3.55529800  | 3.10791800  | -1.46558700 |
| H | 2.40648100  | 2.68819900  | -2.75520800 |
| H | 1.97005800  | 3.87780900  | -1.53056200 |
| H | 1.74907700  | 3.82587200  | 1.74263300  |
| H | 4.43927300  | 0.68604700  | -1.75398200 |

## PAC-ES

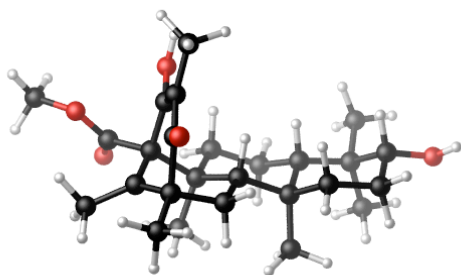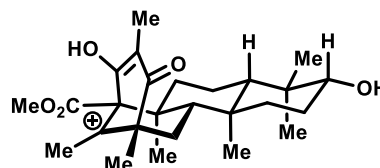

### B3LYP/6-31+G(d,p)//B3LYP/6-31G\*

|                                              |                             |
|----------------------------------------------|-----------------------------|
| Zero-point correction=                       | 0.612968 (Hartree/Particle) |
| Thermal correction to Energy=                | 0.644915                    |
| Thermal correction to Enthalpy=              | 0.645859                    |
| Thermal correction to Gibbs Free Energy=     | 0.554362                    |
| Sum of electronic and zero-point Energies=   | -1389.568666                |
| Sum of electronic and thermal Energies=      | -1389.536719                |
| Sum of electronic and thermal Enthalpies=    | -1389.535775                |
| Sum of electronic and thermal Free Energies= | -1389.627272                |

### MPW1PW91/6-31+G(d,p)//B3LYP/G-31G\*

|                                              |                             |
|----------------------------------------------|-----------------------------|
| Zero-point correction=                       | 0.615882 (Hartree/Particle) |
| Thermal correction to Energy=                | 0.647131                    |
| Thermal correction to Enthalpy=              | 0.648075                    |
| Thermal correction to Gibbs Free Energy=     | 0.559921                    |
| Sum of electronic and zero-point Energies=   | -1389.260029                |
| Sum of electronic and thermal Energies=      | -1389.228779                |
| Sum of electronic and thermal Enthalpies=    | -1389.227835                |
| Sum of electronic and thermal Free Energies= | -1389.315989                |

|   |             |             |             |
|---|-------------|-------------|-------------|
| C | -4.52448300 | 0.50792700  | 0.87162400  |
| C | -4.01650900 | -0.84637600 | 0.30593100  |
| C | -2.45859100 | -0.73084700 | 0.15110600  |
| C | -1.91264200 | 0.49680800  | -0.66210300 |
| C | -2.52850400 | 1.78818300  | -0.05438400 |
| C | -4.05655300 | 1.72298900  | 0.06613700  |
| O | -5.94582700 | 0.44770600  | 0.92947600  |
| C | -0.34686600 | 0.53070000  | -0.37334000 |
| C | -1.76417000 | -2.02775700 | -0.29334200 |
| C | -0.24781200 | -1.98297100 | -0.03033300 |
| C | 0.43384700  | -0.77532900 | -0.71355000 |
| C | 1.95213800  | -0.54183600 | -0.10721900 |
| C | 2.55459000  | 0.54244000  | -0.94945200 |
| C | 1.91979800  | 1.82471600  | -0.87351700 |
| C | 0.34019400  | 1.77586200  | -0.94429300 |
| C | 3.77196600  | 0.29276900  | -1.75645900 |
| C | 2.23128700  | 2.27131400  | 0.71717800  |
| C | 1.92810600  | -0.04361800 | 1.34036700  |
| C | 2.09271400  | 1.25085400  | 1.72841700  |
| O | 2.46830600  | 3.43920400  | 0.87688800  |
| O | 1.75886400  | -1.04716900 | 2.20628200  |

|   |             |             |             |
|---|-------------|-------------|-------------|
| C | -2.25096500 | 0.45727100  | -2.17423000 |
| C | 0.59110200  | -1.03911200 | -2.22883600 |
| C | -4.34118100 | -1.92837000 | 1.36425500  |
| C | -4.76816400 | -1.22617000 | -0.98804100 |
| C | 2.10688100  | 1.67242300  | 3.18003300  |
| C | 2.83859000  | -1.82618800 | -0.13754900 |
| O | 2.58377700  | -2.84636900 | -0.72848300 |
| O | 3.96766900  | -1.61527600 | 0.55620200  |
| C | 4.88082000  | -2.74129000 | 0.63730100  |
| C | 2.45248400  | 2.93091900  | -1.78664100 |
| H | -4.11406100 | 0.60123500  | 1.89438300  |
| H | -2.11066300 | -0.54776300 | 1.18259300  |
| H | -2.10421100 | 1.95139000  | 0.94821600  |
| H | -2.25516800 | 2.66397600  | -0.65588100 |
| H | -4.41257000 | 2.63938400  | 0.55663600  |
| H | -4.53521200 | 1.70504400  | -0.91909000 |
| H | -0.31124000 | 0.62031500  | 0.71853600  |
| H | -2.16003100 | -2.88057900 | 0.26539100  |
| H | -1.96828500 | -2.24545700 | -1.34738000 |
| H | 0.21919900  | -2.91013800 | -0.36934900 |
| H | -0.09621200 | -1.92783100 | 1.05227500  |
| H | -0.03068900 | 2.68467800  | -0.46456200 |
| H | 0.12834800  | 1.88320200  | -2.01311300 |
| H | 3.73620900  | -0.70324000 | -2.21251100 |
| H | 3.93918500  | 1.04723200  | -2.52313600 |
| H | -2.29263500 | -0.55337700 | -2.58353700 |
| H | -3.22503700 | 0.90953000  | -2.36702800 |
| H | -1.53052100 | 1.02287200  | -2.77307000 |
| H | 0.92606300  | -0.15651800 | -2.78872300 |
| H | 1.29881500  | -1.85106300 | -2.40404100 |
| H | -0.35964600 | -1.34398700 | -2.66437100 |
| H | -4.18041600 | -2.94131300 | 0.98196100  |
| H | -5.39231000 | -1.84751200 | 1.65237400  |
| H | -3.73211700 | -1.80518000 | 2.26927800  |
| H | -4.74621800 | -0.44596200 | -1.75146700 |
| H | -4.35296000 | -2.14001600 | -1.42731000 |
| H | -5.81866600 | -1.41649600 | -0.75571800 |
| H | 2.43119800  | 2.71192400  | 3.25857700  |
| H | 2.80736700  | 1.06850000  | 3.77234300  |
| H | 1.11286100  | 1.60230100  | 3.63992500  |
| H | 5.72000900  | -2.38535700 | 1.23277700  |
| H | 4.38525100  | -3.58381100 | 1.12296400  |
| H | 5.20598000  | -3.03478000 | -0.36279700 |
| H | 3.51591200  | 3.12743100  | -1.63108300 |
| H | 2.28751600  | 2.66716200  | -2.83649100 |
| H | 1.91868900  | 3.86037700  | -1.58022600 |
| H | 4.64140300  | 0.27701500  | -1.07981700 |
| H | 1.79034100  | -0.72403100 | 3.12513600  |
| H | -6.26625400 | 1.24420900  | 1.38006100  |

## TS-DK

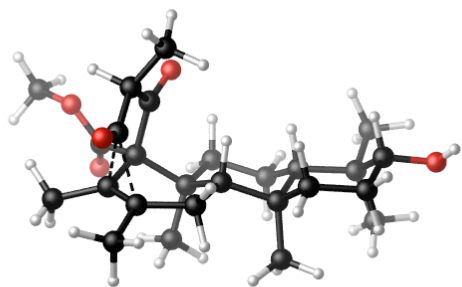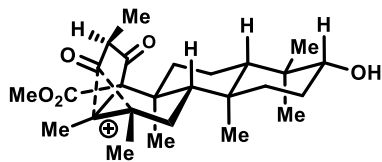

### B3LYP/6-31+G(d,p)//B3LYP/6-31G\*

|                                              |                             |
|----------------------------------------------|-----------------------------|
| Zero-point correction=                       | 0.611276 (Hartree/Particle) |
| Thermal correction to Energy=                | 0.642934                    |
| Thermal correction to Enthalpy=              | 0.643878                    |
| Thermal correction to Gibbs Free Energy=     | 0.552689                    |
| Sum of electronic and zero-point Energies=   | -1389.554706                |
| Sum of electronic and thermal Energies=      | -1389.523048                |
| Sum of electronic and thermal Enthalpies=    | -1389.522104                |
| Sum of electronic and thermal Free Energies= | -1389.613292                |

### MPW1PW91/6-31+G(d,p)//B3LYP/G-31G\*

|                                              |                             |
|----------------------------------------------|-----------------------------|
| Zero-point correction=                       | 0.614129 (Hartree/Particle) |
| Thermal correction to Energy=                | 0.645125                    |
| Thermal correction to Enthalpy=              | 0.646070                    |
| Thermal correction to Gibbs Free Energy=     | 0.558321                    |
| Sum of electronic and zero-point Energies=   | -1389.243901                |
| Sum of electronic and thermal Energies=      | -1389.212905                |
| Sum of electronic and thermal Enthalpies=    | -1389.211961                |
| Sum of electronic and thermal Free Energies= | -1389.299709                |

|   |             |             |             |
|---|-------------|-------------|-------------|
| C | -4.50133200 | 0.51917000  | 0.93012500  |
| C | -4.03004100 | -0.80039700 | 0.25972800  |
| C | -2.47132800 | -0.71098700 | 0.09936600  |
| C | -1.90177400 | 0.56364400  | -0.62134300 |
| C | -2.48492000 | 1.81945600  | 0.08448800  |
| C | -4.01301100 | 1.78074500  | 0.21147000  |
| O | -5.92354400 | 0.48931100  | 0.99744500  |
| C | -0.34396900 | 0.54221200  | -0.34286600 |
| C | -1.81101000 | -1.98499700 | -0.45432600 |
| C | -0.29184900 | -1.99941000 | -0.20720500 |
| C | 0.42262900  | -0.74786400 | -0.77586900 |
| C | 1.90628400  | -0.57361500 | -0.14212200 |
| C | 2.59629300  | 0.55204100  | -0.89058500 |
| C | 1.88548700  | 1.74492200  | -1.04848800 |
| C | 0.37595300  | 1.81670900  | -0.82993500 |
| C | 3.96663200  | 0.34084700  | -1.46067900 |
| C | 2.69666800  | 2.09734300  | 0.80228500  |
| C | 1.79899100  | -0.21130600 | 1.38336000  |
| C | 2.45617100  | 1.09024900  | 1.86947800  |
| O | 3.15257100  | 3.17658500  | 0.78626000  |
| O | 1.29330600  | -0.95405800 | 2.18448200  |
| C | -2.24778500 | 0.64351100  | -2.13040900 |

|   |             |             |             |
|---|-------------|-------------|-------------|
| C | 0.56956800  | -0.90484900 | -2.30896700 |
| C | -4.37258800 | -1.95110800 | 1.23676200  |
| C | -4.80108900 | -1.06411300 | -1.05138000 |
| C | 1.77505500  | 1.70971000  | 3.10618200  |
| C | 2.75870100  | -1.87237300 | -0.19495200 |
| O | 2.62167000  | -2.77505500 | -0.98173900 |
| O | 3.71663000  | -1.83376500 | 0.75090100  |
| C | 4.56805900  | -3.00859200 | 0.84132200  |
| C | 2.41766700  | 2.89156700  | -1.87858600 |
| H | -4.08052700 | 0.52591800  | 1.95261000  |
| H | -2.10920800 | -0.61826600 | 1.13768400  |
| H | -2.05434600 | 1.89502400  | 1.09535200  |
| H | -2.19083300 | 2.73206300  | -0.45004200 |
| H | -4.34690700 | 2.66615500  | 0.76982500  |
| H | -4.49775400 | 1.84354100  | -0.76907000 |
| H | -6.21919500 | 1.24636800  | 1.52611800  |
| H | -0.30298200 | 0.55334200  | 0.75426300  |
| H | -2.22467700 | -2.86854000 | 0.03979500  |
| H | -2.03299100 | -2.11221800 | -1.51979500 |
| H | 0.14813800  | -2.89644500 | -0.65220200 |
| H | -0.12650600 | -2.06467600 | 0.87097700  |
| H | 0.14250800  | 2.67079500  | -0.18242400 |
| H | -0.00685100 | 2.11860500  | -1.81384900 |
| H | 3.88840500  | -0.43301600 | -2.23825300 |
| H | 4.38929500  | 1.23317100  | -1.91918100 |
| H | 4.66136700  | -0.05047700 | -0.71099800 |
| H | 3.47760300  | 0.77157100  | 2.14593600  |
| H | -2.30902900 | -0.33335100 | -2.61207200 |
| H | -3.21316300 | 1.12819400  | -2.28342400 |
| H | -1.51935900 | 1.23615300  | -2.69400000 |
| H | 0.88088800  | 0.01440000  | -2.81774700 |
| H | 1.28961500  | -1.69183400 | -2.53976600 |
| H | -0.38088900 | -1.20283300 | -2.75110500 |
| H | -4.24416800 | -2.93492500 | 0.77466400  |
| H | -5.41763500 | -1.86523800 | 1.54487700  |
| H | -3.74911000 | -1.91570200 | 2.13944500  |
| H | -4.75959400 | -0.23376600 | -1.75938200 |
| H | -4.41563800 | -1.95700500 | -1.55567800 |
| H | -5.85543900 | -1.23868700 | -0.82419300 |
| H | 2.37348300  | 2.53402900  | 3.49967700  |
| H | 1.67964300  | 0.93036900  | 3.86482600  |
| H | 0.77508600  | 2.07794700  | 2.86143800  |
| H | 5.25561100  | -2.80042600 | 1.65940300  |
| H | 3.95882600  | -3.88774000 | 1.05694900  |
| H | 5.10586500  | -3.15383100 | -0.09750700 |
| H | 3.48124700  | 3.08644700  | -1.73824900 |
| H | 2.24887800  | 2.66435900  | -2.93872500 |
| H | 1.87450600  | 3.81129900  | -1.64609400 |



## TS-EN

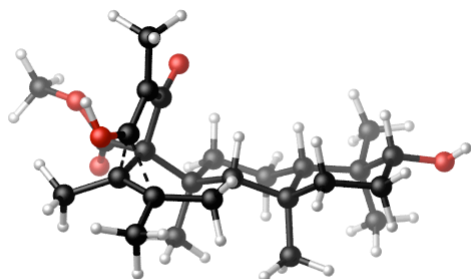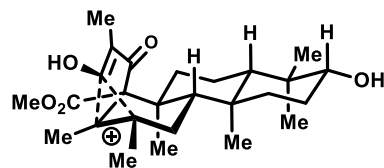

### B3LYP/6-31+G(d,p)//B3LYP/6-31G\*

|                                              |                             |
|----------------------------------------------|-----------------------------|
| Zero-point correction=                       | 0.611885 (Hartree/Particle) |
| Thermal correction to Energy=                | 0.643360                    |
| Thermal correction to Enthalpy=              | 0.644304                    |
| Thermal correction to Gibbs Free Energy=     | 0.554862                    |
| Sum of electronic and zero-point Energies=   | -1389.551267                |
| Sum of electronic and thermal Energies=      | -1389.519792                |
| Sum of electronic and thermal Enthalpies=    | -1389.518848                |
| Sum of electronic and thermal Free Energies= | -1389.608291                |

### MPW1PW91/6-31+G(d,p)//B3LYP/G-31G\*

|                                              |                             |
|----------------------------------------------|-----------------------------|
| Zero-point correction=                       | 0.614821 (Hartree/Particle) |
| Thermal correction to Energy=                | 0.645627                    |
| Thermal correction to Enthalpy=              | 0.646572                    |
| Thermal correction to Gibbs Free Energy=     | 0.559758                    |
| Sum of electronic and zero-point Energies=   | -1389.246028                |
| Sum of electronic and thermal Energies=      | -1389.215222                |
| Sum of electronic and thermal Enthalpies=    | -1389.214277                |
| Sum of electronic and thermal Free Energies= | -1389.301091                |

|   |             |             |             |
|---|-------------|-------------|-------------|
| C | 4.55544300  | -0.51043400 | 1.02459900  |
| C | 4.09819400  | 0.75818400  | 0.25369700  |
| C | 2.53962300  | 0.67099600  | 0.09211200  |
| C | 1.95939500  | -0.65111800 | -0.52724300 |
| C | 2.52709500  | -1.85169200 | 0.28013000  |
| C | 4.05552100  | -1.81886000 | 0.40565500  |
| O | 5.97807000  | -0.49004500 | 1.09359700  |
| C | 0.40014800  | -0.58931900 | -0.25979600 |
| C | 1.89398000  | 1.90299400  | -0.56535100 |
| C | 0.37579400  | 1.94867100  | -0.33049000 |
| C | -0.35792700 | 0.66614300  | -0.80414900 |
| C | -1.81184400 | 0.58090700  | -0.15187300 |
| C | -2.59399600 | -0.62459800 | -0.73460500 |
| C | -1.83454000 | -1.83635800 | -0.84805400 |
| C | -0.32694500 | -1.88988600 | -0.64340700 |
| C | -3.88608800 | -0.40496300 | -1.48459300 |
| C | -2.79624700 | -1.69976500 | 0.65209100  |
| C | -1.73336600 | 0.30355100  | 1.37627400  |
| C | -2.38851600 | -0.98451400 | 1.73341500  |
| O | -3.69495300 | -2.70289200 | 0.64245600  |
| O | -1.28352000 | 1.05875900  | 2.20883800  |

|   |             |             |             |
|---|-------------|-------------|-------------|
| C | 2.31241800  | -0.85561900 | -2.02347300 |
| C | -0.49969100 | 0.69025900  | -2.34410900 |
| C | 4.44609600  | 1.97589200  | 1.14446000  |
| C | 4.87810200  | 0.91734600  | -1.06893600 |
| C | -2.69526100 | -1.30316500 | 3.15690300  |
| C | -2.65091900 | 1.87788600  | -0.32571700 |
| O | -2.49661500 | 2.70586100  | -1.18893000 |
| O | -3.61402600 | 1.93817900  | 0.61156800  |
| C | -4.44412100 | 3.12946100  | 0.58969400  |
| C | -2.34411500 | -3.01721300 | -1.65313400 |
| H | 4.13283600  | -0.43372700 | 2.04336200  |
| H | 2.17149500  | 0.66446900  | 1.13233700  |
| H | 2.09399000  | -1.84013600 | 1.29222400  |
| H | 2.22476800  | -2.80206400 | -0.17904200 |
| H | 4.38063900  | -2.66143000 | 1.03147600  |
| H | 4.53978100  | -1.96190800 | -0.56666100 |
| H | 6.26374700  | -1.20712800 | 1.68027400  |
| H | 0.35285200  | -0.51179500 | 0.83369900  |
| H | 2.31528000  | 2.81948300  | -0.14265200 |
| H | 2.12097100  | 1.94075500  | -1.63686800 |
| H | -0.05207000 | 2.81623000  | -0.84036800 |
| H | 0.20138000  | 2.09224900  | 0.74078100  |
| H | -0.09722900 | -2.69686800 | 0.05996200  |
| H | 0.04015700  | -2.25414200 | -1.61107800 |
| H | -3.64360800 | 0.11130400  | -2.42213300 |
| H | -4.39477500 | -1.33571900 | -1.73241700 |
| H | -4.56704200 | 0.23066000  | -0.91647800 |
| H | 2.39034000  | 0.07922800  | -2.58045300 |
| H | 3.27146400  | -1.36483400 | -2.13070100 |
| H | 1.57814600  | -1.48054900 | -2.54312300 |
| H | -0.85742500 | -0.25642300 | -2.76645800 |
| H | -1.18521000 | 1.48423700  | -2.64463900 |
| H | 0.46169000  | 0.89750800  | -2.81343600 |
| H | 4.32833000  | 2.92390700  | 0.61030700  |
| H | 5.48909200  | 1.90453500  | 1.46340600  |
| H | 3.81796400  | 2.01256100  | 2.04384600  |
| H | 4.82541400  | 0.04030300  | -1.71742300 |
| H | 4.50861600  | 1.77815700  | -1.63688700 |
| H | 5.93424200  | 1.09136400  | -0.84969100 |
| H | -2.78939200 | -2.37844300 | 3.33716200  |
| H | -3.62617900 | -0.80849500 | 3.47044900  |
| H | -1.90554000 | -0.89297000 | 3.79352800  |
| H | -5.14547200 | 3.00369200  | 1.41301400  |
| H | -3.82263900 | 4.01392600  | 0.73916700  |
| H | -4.96788100 | 3.20577800  | -0.36526000 |
| H | -2.05347700 | -2.83274600 | -2.69529700 |
| H | -1.85504500 | -3.93812600 | -1.32579700 |
| H | -3.42057600 | -3.16523900 | -1.62192100 |
| H | -4.24065900 | -2.67521200 | 1.44894500  |

## TS-ES

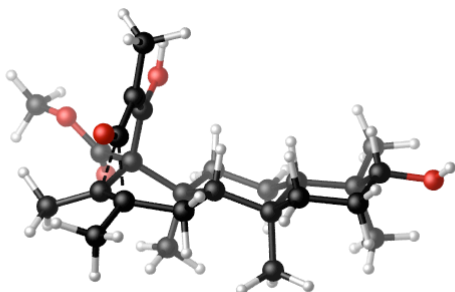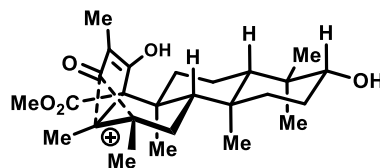

### B3LYP/6-31+G(d,p)//B3LYP/6-31G\*

Zero-point correction= 0.612830 (Hartree/Particle)  
 Thermal correction to Energy= 0.644079  
 Thermal correction to Enthalpy= 0.645023  
 Thermal correction to Gibbs Free Energy= 0.556138  
 Sum of electronic and zero-point Energies= -1389.568488  
 Sum of electronic and thermal Energies= -1389.537239  
 Sum of electronic and thermal Enthalpies= -1389.536295  
 Sum of electronic and thermal Free Energies= -1389.625181

### MPW1PW91/6-31+G(d,p)//B3LYP/G-31G\*

Zero-point correction= 0.615670 (Hartree/Particle)  
 Thermal correction to Energy= 0.646295  
 Thermal correction to Enthalpy= 0.647239  
 Thermal correction to Gibbs Free Energy= 0.560811  
 Sum of electronic and zero-point Energies= -1389.259820  
 Sum of electronic and thermal Energies= -1389.229195  
 Sum of electronic and thermal Enthalpies= -1389.228251  
 Sum of electronic and thermal Free Energies= -1389.314680

|   |             |             |             |
|---|-------------|-------------|-------------|
| C | -4.52153600 | 0.50398100  | 0.90834400  |
| C | -4.02789600 | -0.83180400 | 0.28837500  |
| C | -2.47015100 | -0.72299300 | 0.13128600  |
| C | -1.91666000 | 0.52997300  | -0.63725800 |
| C | -2.52125200 | 1.80282400  | 0.01896200  |
| C | -4.04903700 | 1.74481100  | 0.14544100  |
| O | -5.94307500 | 0.45312400  | 0.97368500  |
| C | -0.35386400 | 0.54301500  | -0.35370400 |
| C | -1.78608100 | -2.00712900 | -0.36543900 |
| C | -0.26942600 | -1.98299300 | -0.10726200 |
| C | 0.42577300  | -0.75252200 | -0.73811100 |
| C | 1.92826700  | -0.54607700 | -0.13132100 |
| C | 2.57280500  | 0.56498600  | -0.93217400 |
| C | 1.89991900  | 1.80992700  | -0.92356600 |
| C | 0.34297000  | 1.80492300  | -0.88531400 |
| C | 3.87556600  | 0.34675800  | -1.61349000 |
| C | 2.36290700  | 2.22112500  | 0.74864800  |
| C | 1.90867200  | -0.07617600 | 1.32529700  |
| C | 2.14170600  | 1.20514800  | 1.73547800  |
| O | 2.70463300  | 3.35967500  | 0.86410800  |
| O | 1.66849100  | -1.07061500 | 2.17843000  |

|   |             |             |             |
|---|-------------|-------------|-------------|
| C | -2.26338400 | 0.54715100  | -2.14848800 |
| C | 0.57568400  | -0.95990100 | -2.26438800 |
| C | -4.35783200 | -1.95164500 | 1.30462000  |
| C | -4.78847800 | -1.15390600 | -1.01588500 |
| C | 2.15922400  | 1.60801300  | 3.19358300  |
| C | 2.80122800  | -1.84038600 | -0.18703900 |
| O | 2.57476600  | -2.80812600 | -0.87034800 |
| O | 3.88047400  | -1.70948000 | 0.60022100  |
| C | 4.76949200  | -2.85677100 | 0.65018300  |
| C | 2.42521400  | 2.93925300  | -1.80552900 |
| H | -4.10393500 | 0.55534100  | 1.93125400  |
| H | -2.11631500 | -0.58185200 | 1.16752300  |
| H | -2.09164400 | 1.92723200  | 1.02499800  |
| H | -2.24350100 | 2.69779100  | -0.55169600 |
| H | -4.39600500 | 2.64507100  | 0.67121300  |
| H | -4.53309000 | 1.76622600  | -0.83720800 |
| H | -6.25396800 | 1.23768000  | 1.45113100  |
| H | -0.31396500 | 0.59638200  | 0.74123100  |
| H | -2.18823500 | -2.87814300 | 0.15974400  |
| H | -1.99488400 | -2.18104600 | -1.42679200 |
| H | 0.18906400  | -2.89831800 | -0.48915800 |
| H | -0.11467800 | -1.97951100 | 0.97635600  |
| H | 0.01001200  | 2.69286400  | -0.34090500 |
| H | 0.06684000  | 1.98034100  | -1.93176200 |
| H | 3.80640200  | -0.56280400 | -2.22636200 |
| H | 4.17347100  | 1.17926100  | -2.24737400 |
| H | 4.66237900  | 0.14505900  | -0.87459200 |
| H | -2.32550300 | -0.44843000 | -2.59079200 |
| H | -3.22996600 | 1.02326400  | -2.32067800 |
| H | -1.53602900 | 1.11818700  | -2.73385900 |
| H | 0.91658500  | -0.06024600 | -2.79138900 |
| H | 1.27454400  | -1.77143300 | -2.47223600 |
| H | -0.37977000 | -1.23867300 | -2.70724500 |
| H | -4.21012800 | -2.94975200 | 0.88041100  |
| H | -5.40609900 | -1.87180000 | 1.60317600  |
| H | -3.74151600 | -1.87194800 | 2.20963400  |
| H | -4.76361600 | -0.34406100 | -1.74767300 |
| H | -4.38147900 | -2.05256900 | -1.49249000 |
| H | -5.83937500 | -1.34542600 | -0.78630900 |
| H | 1.15682000  | 1.58142200  | 3.63947900  |
| H | 2.53565100  | 2.62778300  | 3.29449400  |
| H | 2.82165100  | 0.96034200  | 3.78342500  |
| H | 5.56571600  | -2.57057300 | 1.33546000  |
| H | 4.22712900  | -3.72817800 | 1.02121100  |
| H | 5.16578700  | -3.06860400 | -0.34483000 |
| H | 3.48197000  | 3.15572500  | -1.64009300 |
| H | 2.27435400  | 2.68327500  | -2.85995700 |
| H | 1.86973400  | 3.85579700  | -1.59538900 |
| H | 1.70028700  | -0.75981200 | 3.10179900  |

## ATC-DK

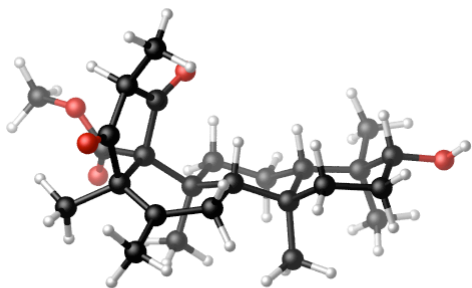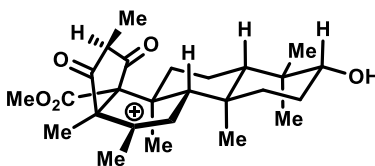

### B3LYP/6-31+G(d,p)//B3LYP/6-31G\*

|                                              |                             |
|----------------------------------------------|-----------------------------|
| Zero-point correction=                       | 0.611334 (Hartree/Particle) |
| Thermal correction to Energy=                | 0.643132                    |
| Thermal correction to Enthalpy=              | 0.644076                    |
| Thermal correction to Gibbs Free Energy=     | 0.552582                    |
| Sum of electronic and zero-point Energies=   | -1389.565515                |
| Sum of electronic and thermal Energies=      | -1389.533717                |
| Sum of electronic and thermal Enthalpies=    | -1389.532773                |
| Sum of electronic and thermal Free Energies= | -1389.624268                |

### MPW1PW91/6-31+G(d,p)//B3LYP/G-31G\*

|                                              |                             |
|----------------------------------------------|-----------------------------|
| Zero-point correction=                       | 0.614102 (Hartree/Particle) |
| Thermal correction to Energy=                | 0.645275                    |
| Thermal correction to Enthalpy=              | 0.646219                    |
| Thermal correction to Gibbs Free Energy=     | 0.558117                    |
| Sum of electronic and zero-point Energies=   | -1389.256930                |
| Sum of electronic and thermal Energies=      | -1389.225757                |
| Sum of electronic and thermal Enthalpies=    | -1389.224812                |
| Sum of electronic and thermal Free Energies= | -1389.312915                |

|   |             |             |             |
|---|-------------|-------------|-------------|
| C | 4.57414200  | -0.44054400 | 1.03121400  |
| C | 4.09502000  | 0.78906000  | 0.21110100  |
| C | 2.53692000  | 0.67494100  | 0.06047300  |
| C | 1.97776200  | -0.68054500 | -0.50419900 |
| C | 2.56266000  | -1.83791000 | 0.35270700  |
| C | 4.09114000  | -1.78162200 | 0.46894500  |
| O | 5.99623900  | -0.39744000 | 1.09044300  |
| C | 0.42411400  | -0.63403900 | -0.22835500 |
| C | 1.86943300  | 1.86867800  | -0.64524300 |
| C | 0.35368500  | 1.90702300  | -0.39168100 |
| C | -0.37078300 | 0.58952600  | -0.78631800 |
| C | -1.81399400 | 0.50346000  | -0.11256400 |
| C | -2.58213700 | -0.78388500 | -0.60456400 |
| C | -1.71225800 | -1.87126800 | -1.02632400 |
| C | -0.29170700 | -1.94878900 | -0.61956100 |
| C | -3.82822600 | -0.55190000 | -1.49431700 |
| C | -3.22290700 | -1.46309100 | 0.80843200  |
| C | -1.77672900 | 0.38023000  | 1.45145200  |
| C | -2.82278100 | -0.60428600 | 1.97436200  |
| O | -3.91114700 | -2.43563900 | 0.78147300  |
| O | -1.04111300 | 0.98772700  | 2.18872800  |

|   |             |             |             |
|---|-------------|-------------|-------------|
| C | 2.32971100  | -0.94012400 | -1.99242100 |
| C | -0.52131100 | 0.53710500  | -2.32429700 |
| C | 4.42922000  | 2.04733700  | 1.04899700  |
| C | 4.86658600  | 0.90214500  | -1.12118700 |
| C | -2.41958200 | -1.39516500 | 3.22880600  |
| C | -2.67303000 | 1.76887000  | -0.40597100 |
| O | -2.56370600 | 2.49632200  | -1.36139100 |
| O | -3.59441000 | 1.94679200  | 0.56143200  |
| C | -4.43648800 | 3.12480900  | 0.43047000  |
| C | -2.29205900 | -3.03007200 | -1.73673800 |
| H | 4.15531500  | -0.32875500 | 2.04802900  |
| H | 2.17139300  | 0.70522900  | 1.10078700  |
| H | 2.13534600  | -1.78382300 | 1.36559200  |
| H | 2.26719200  | -2.81262800 | -0.05991700 |
| H | 4.42967700  | -2.59233900 | 1.12838100  |
| H | 4.57376300  | -1.95872300 | -0.49851000 |
| H | 6.29545100  | -1.07311900 | 1.71808400  |
| H | 0.37244100  | -0.55127900 | 0.86099600  |
| H | 2.28424400  | 2.80724800  | -0.26719200 |
| H | 2.08462200  | 1.86220000  | -1.71976000 |
| H | -0.09478400 | 2.73721600  | -0.94539000 |
| H | 0.19256700  | 2.10242200  | 0.67083400  |
| H | -3.52369800 | -0.12131600 | -2.45265100 |
| H | -4.37356800 | -1.47932700 | -1.66951800 |
| H | -4.51592400 | 0.14364900  | -1.01002500 |
| H | 2.41270400  | -0.02608300 | -2.58271400 |
| H | 3.28584400  | -1.45801400 | -2.08261700 |
| H | 1.59172700  | -1.57728900 | -2.49298400 |
| H | -0.89224900 | -0.42858900 | -2.70237600 |
| H | -1.20444300 | 1.31280500  | -2.66931700 |
| H | 0.44187100  | 0.69934600  | -2.80716600 |
| H | 4.29622400  | 2.97052100  | 0.47630500  |
| H | 5.47451400  | 2.00348800  | 1.36540500  |
| H | 3.80435200  | 2.11258500  | 1.94887600  |
| H | 4.82636000  | -0.00491100 | -1.72766600 |
| H | 4.48076100  | 1.72967600  | -1.72646600 |
| H | 5.92046200  | 1.10348100  | -0.91517100 |
| H | -3.25333300 | -2.00734200 | 3.57930800  |
| H | -2.13740700 | -0.68555300 | 4.00989700  |
| H | -1.56250300 | -2.04665500 | 3.03356800  |
| H | -5.09872800 | 3.09942400  | 1.29425400  |
| H | -3.81641900 | 4.02255800  | 0.43921900  |
| H | -5.00291300 | 3.07733900  | -0.50141500 |
| H | -2.70246500 | -2.72476500 | -2.70915600 |
| H | -1.57441200 | -3.83856800 | -1.88448700 |
| H | -3.15874200 | -3.39289600 | -1.15709100 |
| H | -0.27343600 | -2.66666000 | 0.22437800  |
| H | 0.23182400  | -2.50125800 | -1.40920500 |
| H | -3.70893200 | 0.00893800  | 2.20208700  |

## ATC-EN

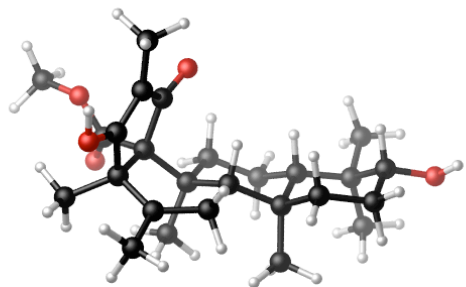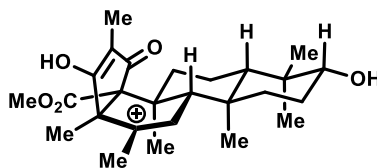

### B3LYP/6-31+G(d,p)//B3LYP/6-31G\*

|                                              |                             |
|----------------------------------------------|-----------------------------|
| Zero-point correction=                       | 0.611647 (Hartree/Particle) |
| Thermal correction to Energy=                | 0.643609                    |
| Thermal correction to Enthalpy=              | 0.644553                    |
| Thermal correction to Gibbs Free Energy=     | 0.553165                    |
| Sum of electronic and zero-point Energies=   | -1389.566103                |
| Sum of electronic and thermal Energies=      | -1389.534141                |
| Sum of electronic and thermal Enthalpies=    | -1389.533197                |
| Sum of electronic and thermal Free Energies= | -1389.624585                |

### MPW1PW91/6-31+G(d,p)//B3LYP/G-31G\*

|                                              |                             |
|----------------------------------------------|-----------------------------|
| Zero-point correction=                       | 0.614569 (Hartree/Particle) |
| Thermal correction to Energy=                | 0.645852                    |
| Thermal correction to Enthalpy=              | 0.646796                    |
| Thermal correction to Gibbs Free Energy=     | 0.558535                    |
| Sum of electronic and zero-point Energies=   | -1389.258929                |
| Sum of electronic and thermal Energies=      | -1389.227647                |
| Sum of electronic and thermal Enthalpies=    | -1389.226702                |
| Sum of electronic and thermal Free Energies= | -1389.314963                |

|   |             |             |             |
|---|-------------|-------------|-------------|
| C | 4.58190100  | -0.41299500 | 1.08611800  |
| C | 4.11379600  | 0.77932600  | 0.20710800  |
| C | 2.55651400  | 0.66455200  | 0.04967100  |
| C | 1.99667200  | -0.71317500 | -0.45750100 |
| C | 2.57191900  | -1.83379000 | 0.45294400  |
| C | 4.09973300  | -1.77663300 | 0.57961600  |
| O | 6.00383300  | -0.37214500 | 1.15583300  |
| C | 0.44167900  | -0.64644000 | -0.19573300 |
| C | 1.89849600  | 1.82566600  | -0.71665200 |
| C | 0.38047500  | 1.87754900  | -0.48290900 |
| C | -0.35006100 | 0.54748900  | -0.82067200 |
| C | -1.78332500 | 0.50421200  | -0.14329500 |
| C | -2.59924000 | -0.79756500 | -0.54979900 |
| C | -1.69578000 | -1.93367400 | -0.90166800 |
| C | -0.27053900 | -1.97360600 | -0.52764400 |
| C | -3.77308100 | -0.59605500 | -1.53395100 |
| C | -3.11143400 | -1.32802800 | 0.81662000  |
| C | -1.73372900 | 0.41698700  | 1.41875100  |
| C | -2.60242600 | -0.67878800 | 1.88638700  |
| O | -4.00557900 | -2.33071200 | 0.76813900  |
| O | -1.10867900 | 1.15571800  | 2.15253100  |

|   |             |             |             |
|---|-------------|-------------|-------------|
| C | 2.35847800  | -1.03749800 | -1.93068200 |
| C | -0.49878700 | 0.41763900  | -2.35259800 |
| C | 4.44689300  | 2.07384900  | 0.98801100  |
| C | 4.89575200  | 0.82709300  | -1.12344100 |
| C | -2.90989200 | -0.88014400 | 3.33471400  |
| C | -2.63754900 | 1.75778500  | -0.48400900 |
| O | -2.50924200 | 2.45689900  | -1.46078500 |
| O | -3.57374200 | 1.96118100  | 0.45832100  |
| C | -4.40979300 | 3.13298900  | 0.27860100  |
| C | -2.24944100 | -3.13073500 | -1.57253300 |
| H | 4.15466800  | -0.25486000 | 2.09312400  |
| H | 2.18222400  | 0.74410800  | 1.08422100  |
| H | 2.13598400  | -1.73566500 | 1.45883600  |
| H | 2.27790700  | -2.82477800 | 0.07918900  |
| H | 4.43046100  | -2.55820800 | 1.27719000  |
| H | 4.58999000  | -1.99748400 | -0.37484400 |
| H | 6.29450200  | -1.01699400 | 1.81888200  |
| H | 0.37834300  | -0.51042000 | 0.88782400  |
| H | 2.31129500  | 2.77936700  | -0.37605000 |
| H | 2.12672600  | 1.77137300  | -1.78737000 |
| H | -0.05942800 | 2.68369500  | -1.07685500 |
| H | 0.20389000  | 2.11907900  | 0.56876800  |
| H | -3.41139800 | -0.21616800 | -2.49254100 |
| H | -4.32668900 | -1.52106600 | -1.69938400 |
| H | -4.47433800 | 0.12799500  | -1.11604100 |
| H | 2.44163000  | -0.15009000 | -2.56026400 |
| H | 3.31674200  | -1.55553900 | -1.99264000 |
| H | 1.62636900  | -1.69879900 | -2.40890100 |
| H | -0.89062000 | -0.56102700 | -2.67630600 |
| H | -1.17435500 | 1.18340900  | -2.73422400 |
| H | 0.46354100  | 0.53744800  | -2.84967900 |
| H | 4.31833800  | 2.96965800  | 0.37256300  |
| H | 5.49048400  | 2.04244700  | 1.31161100  |
| H | 3.81712600  | 2.18117400  | 1.88026000  |
| H | 4.85643900  | -0.10756400 | -1.68638300 |
| H | 4.51692700  | 1.62600100  | -1.77012200 |
| H | 5.94894400  | 1.03476700  | -0.92001800 |
| H | -3.19793400 | -1.91110800 | 3.57186500  |
| H | -3.71922400 | -0.21469500 | 3.66026700  |
| H | -2.02908200 | -0.61990200 | 3.92984900  |
| H | -5.08757900 | 3.13265200  | 1.13078900  |
| H | -3.79066100 | 4.03179600  | 0.27347300  |
| H | -4.96077100 | 3.06270100  | -0.66152800 |
| H | -2.49694300 | -2.86392300 | -2.61238700 |
| H | -1.54724700 | -3.96650800 | -1.58575800 |
| H | -3.19868100 | -3.43004100 | -1.11179800 |
| H | -0.21445300 | -2.67650200 | 0.32527300  |
| H | 0.23077700  | -2.54326300 | -1.32247700 |
| H | -4.29001300 | -2.57664600 | 1.66655500  |



## ATC-ES

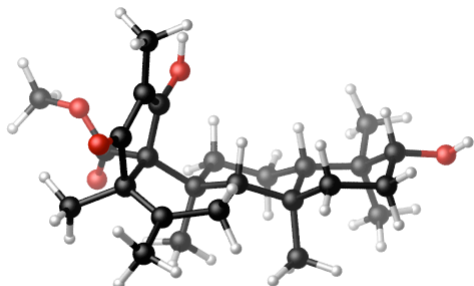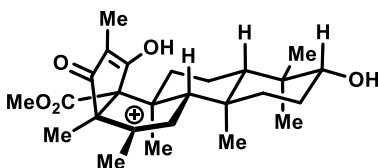

### B3LYP/6-31+G(d,p)//B3LYP/6-31G\*

|                                              |                             |
|----------------------------------------------|-----------------------------|
| Zero-point correction=                       | 0.612463 (Hartree/Particle) |
| Thermal correction to Energy=                | 0.644392                    |
| Thermal correction to Enthalpy=              | 0.645337                    |
| Thermal correction to Gibbs Free Energy=     | 0.554276                    |
| Sum of electronic and zero-point Energies=   | -1389.580970                |
| Sum of electronic and thermal Energies=      | -1389.549041                |
| Sum of electronic and thermal Enthalpies=    | -1389.548096                |
| Sum of electronic and thermal Free Energies= | -1389.639157                |

### MPW1PW91/6-31+G(d,p)//B3LYP/G-31G\*

|                                              |                             |
|----------------------------------------------|-----------------------------|
| Zero-point correction=                       | 0.615325 (Hartree/Particle) |
| Thermal correction to Energy=                | 0.646594                    |
| Thermal correction to Enthalpy=              | 0.647538                    |
| Thermal correction to Gibbs Free Energy=     | 0.559514                    |
| Sum of electronic and zero-point Energies=   | -1389.273245                |
| Sum of electronic and thermal Energies=      | -1389.241976                |
| Sum of electronic and thermal Enthalpies=    | -1389.241032                |
| Sum of electronic and thermal Free Energies= | -1389.329056                |

|   |             |             |             |
|---|-------------|-------------|-------------|
| C | 4.55712800  | -0.38576500 | 1.07414500  |
| C | 4.08122800  | 0.79875000  | 0.18857100  |
| C | 2.52614200  | 0.66738400  | 0.02243700  |
| C | 1.97897800  | -0.71821200 | -0.47513600 |
| C | 2.56529800  | -1.82919000 | 0.44023100  |
| C | 4.09201400  | -1.75541200 | 0.56969200  |
| O | 5.97729800  | -0.32557400 | 1.15410900  |
| C | 0.42205600  | -0.67173300 | -0.21585800 |
| C | 1.86483700  | 1.81763100  | -0.75815600 |
| C | 0.34561100  | 1.86126800  | -0.52533600 |
| C | -0.37002400 | 0.51882800  | -0.84089800 |
| C | -1.82098100 | 0.45753000  | -0.16322000 |
| C | -2.57629200 | -0.85596100 | -0.59114400 |
| C | -1.71845800 | -1.95466100 | -0.93685500 |
| C | -0.28466800 | -2.00571100 | -0.54598000 |
| C | -3.87265400 | -0.69062900 | -1.39940700 |
| C | -3.09070500 | -1.51148100 | 0.93511400  |
| C | -1.81522000 | 0.35973200  | 1.35780100  |
| C | -2.50162200 | -0.67406300 | 1.92875000  |
| O | -3.83597700 | -2.44997400 | 0.98674700  |
| O | -1.19845800 | 1.31878500  | 2.03939700  |

|   |             |             |             |
|---|-------------|-------------|-------------|
| C | 2.34787600  | -1.04668000 | -1.94603200 |
| C | -0.51029200 | 0.38681700  | -2.37672500 |
| C | 4.39863400  | 2.09938000  | 0.96582100  |
| C | 4.86829000  | 0.84937800  | -1.13878100 |
| C | -2.74401500 | -0.88287000 | 3.39987800  |
| C | -2.68609700 | 1.70610600  | -0.53853300 |
| O | -2.62661400 | 2.30837800  | -1.58284300 |
| O | -3.53880000 | 2.01393200  | 0.45123600  |
| C | -4.39034200 | 3.16589000  | 0.21613400  |
| C | -2.30373700 | -3.16971700 | -1.54810000 |
| H | 4.12092500  | -0.22937300 | 2.07833100  |
| H | 2.14560900  | 0.75323700  | 1.05525300  |
| H | 2.12664200  | -1.73337200 | 1.44540800  |
| H | 2.28030900  | -2.82315900 | 0.06979000  |
| H | 4.42937300  | -2.53165400 | 1.27018800  |
| H | 4.58686000  | -1.97369100 | -0.38293300 |
| H | 6.27474400  | -0.99075500 | 1.79376300  |
| H | 0.35668800  | -0.53649500 | 0.87041900  |
| H | 2.27214100  | 2.77803100  | -0.42988500 |
| H | 2.09332300  | 1.75078600  | -1.82734000 |
| H | -0.10264800 | 2.65267300  | -1.13440000 |
| H | 0.18072600  | 2.13520600  | 0.51897200  |
| H | -3.64662700 | -0.31211000 | -2.40090600 |
| H | -4.41123900 | -1.63481100 | -1.48310500 |
| H | -4.53995900 | 0.01907500  | -0.90656800 |
| H | 2.42861700  | -0.16231800 | -2.58003100 |
| H | 3.30955400  | -1.55914400 | -2.00169600 |
| H | 1.62119100  | -1.71390400 | -2.42208200 |
| H | -0.85259000 | -0.60310300 | -2.70840200 |
| H | -1.20878500 | 1.12749700  | -2.76358900 |
| H | 0.45365600  | 0.55337600  | -2.85690100 |
| H | 4.26063600  | 2.99250200  | 0.34839100  |
| H | 5.44177500  | 2.08125300  | 1.29160600  |
| H | 3.76694100  | 2.20164800  | 1.85776000  |
| H | 4.83466100  | -0.08579000 | -1.70094100 |
| H | 4.48843900  | 1.64604900  | -1.78763300 |
| H | 5.91963400  | 1.06196700  | -0.93125100 |
| H | -3.24071000 | -1.84117100 | 3.56759400  |
| H | -3.38881600 | -0.10071700 | 3.82003300  |
| H | -1.80393600 | -0.89745700 | 3.96666300  |
| H | -5.00087800 | 3.25621900  | 1.11315500  |
| H | -3.77686100 | 4.05640300  | 0.06793200  |
| H | -5.01204500 | 2.99865600  | -0.66546000 |
| H | -2.73900800 | -2.94284200 | -2.53037200 |
| H | -1.58072400 | -3.98071700 | -1.65016000 |
| H | -1.33141900 | 1.20440800  | 2.99845100  |
| H | -3.14834300 | -3.49839400 | -0.91779200 |
| H | -0.23218200 | -2.70194300 | 0.31028100  |
| H | 0.22683200  | -2.56008600 | -1.34217800 |

## NBO Analysis

### Comparison of Bond Donor/Acceptor Interactions for ATC-DK, ATC-EN, ATC-ES

Interactions are taken from the second order perturbation theory analysis of Fock matrix in NBO basis at the mPW1PW91/6-31+G(d,p) level of theory. Hydrogen atoms are not numbered and can be assumed to be substituted on the atom to which they are bound. Interactions for the structures shown are listed from greatest to least energy and separated by interactions involving the C<sub>14</sub> empty orbital.

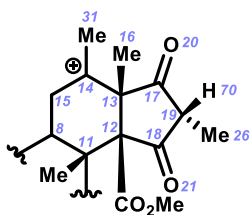

ATC-DK

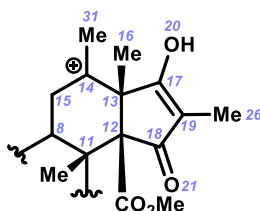

ATC-EN

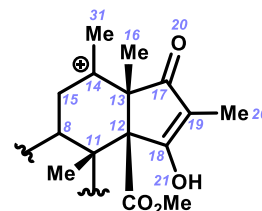

ATC-ES

| Interaction                                    | E (kcal/mol) | Interaction                                       | E (kcal/mol) | Interaction                                       | E (kcal/mol) |
|------------------------------------------------|--------------|---------------------------------------------------|--------------|---------------------------------------------------|--------------|
| $n_{O20} \rightarrow \sigma^*_{C13-C17}$       | <b>37.34</b> | $n_{O20} \rightarrow \pi^*_{C17-C19}$             | 34.34        | $n_{O21} \rightarrow \pi^*_{C18-C19}$             | 43.48        |
| $n_{O21} \rightarrow \sigma^*_{C12-C18}$       | 25.99        | $n_{O21} \rightarrow \sigma^*_{C12-C18}$          | <b>26.15</b> | $n_{O20} \rightarrow \sigma^*_{C13-C17}$          | <b>42.26</b> |
| $n_{O21} \rightarrow \sigma^*_{C18-C19}$       | 23.68        | $\pi_{C17-C19} \rightarrow \pi^*_{C18-O21}$       | 22.74        | $\pi_{C18-C19} \rightarrow \pi^*_{C17-C20}$       | 39.46        |
| $n_{O20} \rightarrow \sigma^*_{C17-C19}$       | 18.66        | $n_{O21} \rightarrow \sigma^*_{C18-C19}$          | 21.83        | $n_{O20} \rightarrow \sigma^*_{C17-C19}$          | 15.90        |
| $\sigma_{C19-H70} \rightarrow \pi^*_{C17-O20}$ | 7.96         | $\sigma_{C18-C19} \rightarrow \sigma^*_{C17-O20}$ | 9.42         | $n_{O21} \rightarrow \sigma^*_{C18-C19}$          | 7.05         |
| $\sigma_{C19-H70} \rightarrow \pi^*_{C18-O21}$ | 7.26         | $n_{O20} \rightarrow \sigma^*_{C17-C19}$          | 7.67         | $\sigma_{O21-H67} \rightarrow \sigma^*_{C12-C18}$ | 6.64         |
|                                                |              | $\sigma_{O20-H70} \rightarrow \sigma^*_{C13-C17}$ | 6.57         | $\sigma_{C17-C19} \rightarrow \sigma^*_{C18-O21}$ | 6.35         |
|                                                |              | $\pi_{C18-O21} \rightarrow \pi^*_{C17-C19}$       | 5.24         | $\sigma_{C26-H59} \rightarrow \sigma^*_{C18-C19}$ | 5.41         |
| $\sigma_{C13-C17} \rightarrow p_{C14}$         | <b>28.09</b> | $\sigma_{C13-C17} \rightarrow p_{C14}$            | <b>18.63</b> | $\sigma_{C13-C17} \rightarrow p_{C14}$            | <b>42.13</b> |
| $\sigma_{C15-H68} \rightarrow p_{C14}$         | 16.61        | $\sigma_{C15-H68} \rightarrow p_{C14}$            | 17.18        | $\sigma_{C15-H69} \rightarrow p_{C14}$            | 13.81        |
| $\sigma_{C31-H67} \rightarrow p_{C14}$         | 11.33        | $\sigma_{C31-H65} \rightarrow p_{C14}$            | 13.59        | $\sigma_{C31-H68} \rightarrow p_{C14}$            | 11.10        |
| $\sigma_{C31-H65} \rightarrow p_{C14}$         | 9.42         | $\pi_{C17-C19} \rightarrow p_{C14}$               | 10.51        | $\sigma_{C31-C65} \rightarrow p_{C14}$            | 8.63         |
| $\sigma_{C15-H69} \rightarrow p_{C14}$         | 5.73         | $\sigma_{C31-H67} \rightarrow p_{C14}$            | 7.98         | $\sigma_{C15-H70} \rightarrow p_{C14}$            | 6.57         |
|                                                |              | $\sigma_{C15-H69} \rightarrow p_{C14}$            | 7.75         |                                                   |              |

## Comparison of Bond Orders and Bond Lengths for ATC-DK, ATC-EN, ATC-ES

Bond orders are taken from the Wiberg bond index matrix in the NAO basis at the mPW1PW91/6-31+G(d,p) level of theory. Bond lengths are calculated from geometric coordinates.

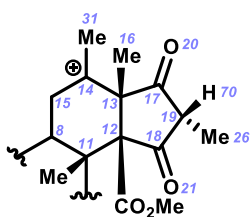

ATC-DK

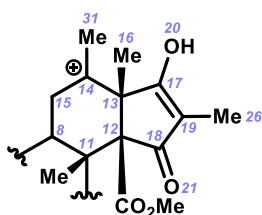

ATC-EN

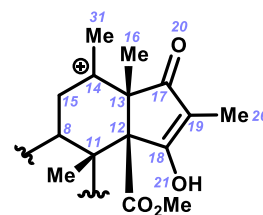

ATC-ES

| bond           | Bond Order   |              |              |
|----------------|--------------|--------------|--------------|
|                | ATC-DK       | ATC-EN       | ATC-ES       |
| C12-C13        | 0.952        | 0.935        | 0.947        |
| <b>C13-C14</b> | <b>1.160</b> | <b>1.039</b> | <b>1.214</b> |
| C14-C15        | 1.124        | 1.149        | 1.102        |
| C11-C12        | 0.945        | 0.953        | 0.936        |
| C12-C18        | 0.922        | 0.922        | 0.982        |
| C18-C19        | 0.959        | 1.049        | 1.522        |
| C19-C17        | 0.999        | 1.616        | 1.172        |
| <b>C17-C13</b> | <b>0.715</b> | <b>0.893</b> | <b>0.645</b> |
| C17-O20        | 1.933        | 1.078        | 1.807        |
| C19-C26        | 0.982        | 1.032        | 1.011        |
| C18-O21        | 1.872        | 1.778        | 1.138        |
| C13-C16        | 0.975        | 0.974        | 0.988        |
| C14-C31        | 1.134        | 1.139        | 1.121        |

| bond           | Bond Length (Å) |             |             |
|----------------|-----------------|-------------|-------------|
|                | ATC-DK          | ATC-EN      | ATC-ES      |
| C12-C13        | 1.58            | 1.59        | 1.57        |
| <b>C13-C14</b> | <b>1.45</b>     | <b>1.49</b> | <b>1.44</b> |
| C14-C15        | 1.48            | 1.47        | 1.49        |
| C11-C12        | 1.60            | 1.59        | 1.60        |
| C12-C18        | 1.57            | 1.57        | 1.52        |
| C18-C19        | 1.53            | 1.47        | 1.37        |
| C19-C17        | 1.50            | 1.35        | 1.43        |
| <b>C17-C13</b> | <b>1.69</b>     | <b>1.55</b> | <b>1.74</b> |
| C17-O20        | 1.19            | 1.34        | 1.20        |
| C19-C26        | 1.54            | 1.49        | 1.51        |
| C18-O21        | 1.21            | 1.21        | 1.33        |
| C13-C16        | 1.55            | 1.55        | 1.54        |
| C14-C31        | 1.48            | 1.48        | 1.48        |

# Truncated Model System Cation and Radical Pathway Minimization and Energies

## Summary of Truncated System Minimized Structures and Energies

*radical (all minima)*

**TSS @ +11.6**

**TSS @ +4.9**

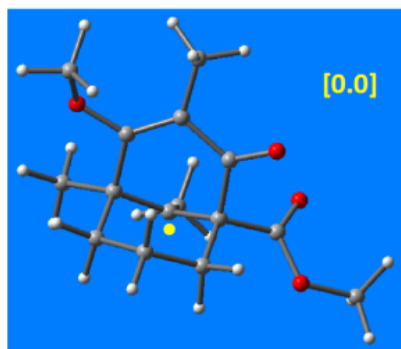

Sum of electronic and thermal Free Energies=  
-884.629514

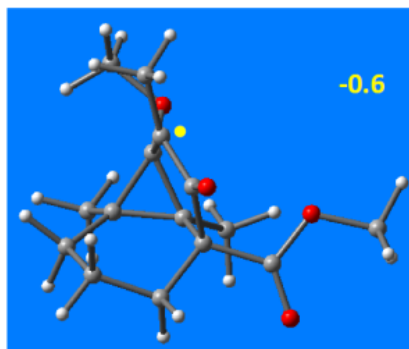

Sum of electronic and thermal Free Energies=  
-884.630405

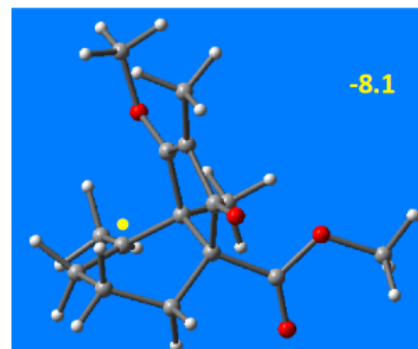

Sum of electronic and thermal Free Energies=  
-884.642465

*cation*

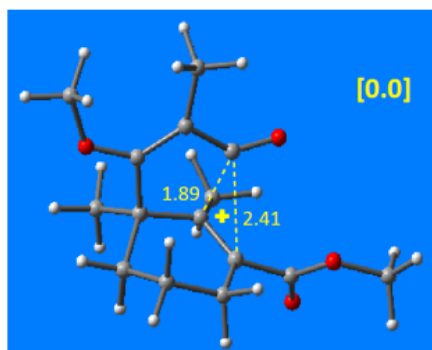

Sum of electronic and thermal Free Energies=  
-884.403063

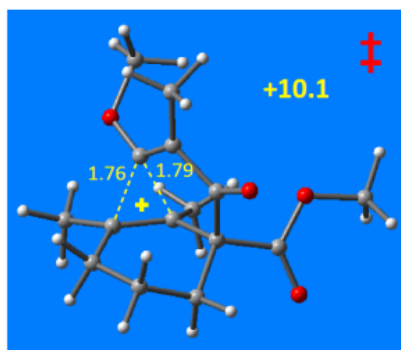

Sum of electronic and thermal Free Energies=  
-884.387008

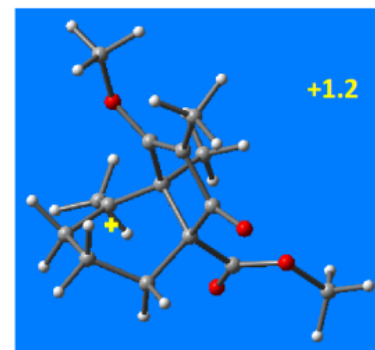

Sum of electronic and thermal Free Energies=  
-884.401102

## Truncated Cation Reactant

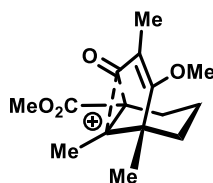

|                                            |                             |
|--------------------------------------------|-----------------------------|
| Zero-point correction=                     | 0.340793 (Hartree/Particle) |
| Thermal correction to Energy=              | 0.361524                    |
| Thermal correction to Enthalpy=            | 0.362468                    |
| Thermal correction to Gibbs Free Energy=   | 0.291345                    |
| Sum of electronic and zero-point Energies= | -884.353615                 |
| Sum of electronic and thermal Energies=    | -884.332884                 |
| Sum of electronic and thermal Enthalpies=  | -884.331940                 |

Sum of electronic and thermal Free Energies= -884.403063

---

| Center<br>Number | Atomic<br>Number | Atomic<br>Type | Coordinates (Angstroms) |           |           |
|------------------|------------------|----------------|-------------------------|-----------|-----------|
|                  |                  |                | X                       | Y         | Z         |
| 1                | 6                | 0              | 0.408838                | -1.434980 | -1.995929 |
| 2                | 6                | 0              | -1.029474               | -1.075215 | -1.657252 |
| 3                | 1                | 0              | 0.947186                | -0.543758 | -2.334638 |
| 4                | 6                | 0              | -1.250497               | -0.593398 | -0.272216 |
| 5                | 6                | 0              | -0.272189               | -0.464563 | 0.716772  |
| 6                | 6                | 0              | 1.121607                | -1.057318 | 0.418804  |
| 7                | 6                | 0              | 1.088498                | -2.035635 | -0.777575 |
| 8                | 1                | 0              | 2.112513                | -2.335067 | -1.009680 |
| 9                | 6                | 0              | 1.709690                | -1.802959 | 1.631124  |
| 10               | 1                | 0              | 2.665010                | -2.246565 | 1.348709  |
| 11               | 1                | 0              | 1.884271                | -1.151102 | 2.487865  |
| 12               | 6                | 0              | 2.012956                | 0.118242  | 0.066448  |
| 13               | 8                | 0              | 3.258727                | -0.246612 | -0.107783 |
| 14               | 6                | 0              | 1.442655                | 1.363639  | -0.023633 |
| 15               | 6                | 0              | 0.056472                | 1.352755  | 0.302273  |
| 16               | 6                | 0              | 2.034914                | 2.728218  | -0.286223 |
| 17               | 1                | 0              | 2.568796                | 3.113085  | 0.585968  |
| 18               | 1                | 0              | 2.711940                | 2.722032  | -1.139172 |
| 19               | 1                | 0              | 1.233813                | 3.432727  | -0.510744 |
| 20               | 8                | 0              | -0.784200               | 2.156138  | 0.491080  |
| 21               | 6                | 0              | -0.693165               | -0.309327 | 2.172308  |
| 22               | 1                | 0              | -0.942901               | -1.286976 | 2.589505  |
| 23               | 1                | 0              | 0.108146                | 0.127749  | 2.767875  |
| 24               | 6                | 0              | -2.694594               | -0.301016 | 0.047259  |
| 25               | 8                | 0              | -3.294687               | -0.996225 | 0.831217  |
| 26               | 8                | 0              | -3.176085               | 0.693939  | -0.669123 |
| 27               | 6                | 0              | -4.562300               | 1.036254  | -0.440292 |
| 28               | 1                | 0              | -4.712144               | 1.284423  | 0.610058  |
| 29               | 1                | 0              | -4.750070               | 1.897733  | -1.074516 |
| 30               | 1                | 0              | -5.198566               | 0.196634  | -0.718961 |
| 31               | 1                | 0              | 0.557479                | -2.939367 | -0.457411 |
| 32               | 1                | 0              | -1.571054               | 0.326945  | 2.268858  |
| 33               | 1                | 0              | 0.422145                | -2.139620 | -2.830138 |
| 34               | 1                | 0              | -1.469573               | -0.347529 | -2.351316 |
| 35               | 1                | 0              | -1.682635               | -1.959409 | -1.752371 |
| 36               | 6                | 0              | 4.330369                | 0.651998  | -0.439347 |
| 37               | 1                | 0              | 4.380807                | 1.473672  | 0.273242  |
| 38               | 1                | 0              | 5.231046                | 0.046952  | -0.370450 |
| 39               | 1                | 0              | 4.210995                | 1.017810  | -1.459039 |
| 40               | 1                | 0              | 1.040078                | -2.608449 | 1.938107  |

---

## Truncated Cation TS

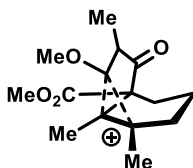

Imaginary: -245.5974 cm<sup>-1</sup>  
 Zero-point correction= 0.339899 (Hartree/Particle)  
 Thermal correction to Energy= 0.359688  
 Thermal correction to Enthalpy= 0.360632  
 Thermal correction to Gibbs Free Energy= 0.293343  
 Sum of electronic and zero-point Energies= -884.340452  
 Sum of electronic and thermal Energies= -884.320663  
 Sum of electronic and thermal Enthalpies= -884.319718  
 Sum of electronic and thermal Free Energies= -884.387008

| Center Number | Atomic Number | Atomic Type | Coordinates (Angstroms) |           |           |
|---------------|---------------|-------------|-------------------------|-----------|-----------|
|               |               |             | X                       | Y         | Z         |
| 1             | 6             | 0           | 0.353801                | 2.481001  | 1.304076  |
| 2             | 6             | 0           | -0.941174               | 2.109766  | 0.596227  |
| 3             | 6             | 0           | -0.868696               | 0.640211  | 0.141866  |
| 4             | 6             | 0           | 0.243228                | 0.422737  | -0.887203 |
| 5             | 6             | 0           | 1.462979                | 1.120356  | -0.614439 |
| 6             | 6             | 0           | 1.563427                | 2.237622  | 0.408872  |
| 7             | 6             | 0           | -0.068373               | -0.164308 | -2.230064 |
| 8             | 6             | 0           | 1.464124                | -0.515293 | 0.022106  |
| 9             | 6             | 0           | -0.479201               | -0.207191 | 1.361532  |
| 10            | 6             | 0           | 0.848442                | -0.848002 | 1.195535  |
| 11            | 8             | 0           | 2.428056                | -1.178274 | -0.605853 |
| 12            | 8             | 0           | -1.180469               | -0.360224 | 2.330713  |
| 13            | 6             | 0           | 1.319968                | -1.813426 | 2.218125  |
| 14            | 6             | 0           | -2.234321               | 0.184577  | -0.395991 |
| 15            | 8             | 0           | -3.062854               | 0.949067  | -0.815352 |
| 16            | 8             | 0           | -2.362366               | -1.140201 | -0.346525 |
| 17            | 6             | 0           | -3.638067               | -1.665950 | -0.769716 |
| 18            | 6             | 0           | 2.535886                | 1.242060  | -1.671723 |
| 19            | 1             | 0           | 2.484590                | 2.117316  | 0.985691  |
| 20            | 1             | 0           | 1.728845                | 3.125027  | -0.215704 |
| 21            | 1             | 0           | -0.613990               | 0.596084  | -2.802203 |
| 22            | 1             | 0           | 0.825501                | -0.421430 | -2.793852 |
| 23            | 1             | 0           | -0.708911               | -1.041309 | -2.144294 |
| 24            | 1             | 0           | 2.407223                | -1.848932 | 2.285713  |
| 25            | 1             | 0           | 0.944654                | -2.822711 | 2.013205  |
| 26            | 1             | 0           | 0.895833                | -1.524669 | 3.182681  |
| 27            | 1             | 0           | -3.564198               | -2.742003 | -0.636568 |
| 28            | 1             | 0           | -4.430472               | -1.252337 | -0.146699 |
| 29            | 1             | 0           | -3.821607               | -1.412294 | -1.813962 |
| 30            | 1             | 0           | 2.247308                | 2.082229  | -2.311874 |
| 31            | 1             | 0           | 3.495373                | 1.482138  | -1.211883 |

|    |   |   |           |           |           |
|----|---|---|-----------|-----------|-----------|
| 32 | 1 | 0 | 2.663259  | 0.364967  | -2.297522 |
| 33 | 6 | 0 | 2.402571  | -2.620152 | -0.604513 |
| 34 | 1 | 0 | 2.983737  | -2.917475 | -1.474881 |
| 35 | 1 | 0 | 2.869572  | -3.012806 | 0.297780  |
| 36 | 1 | 0 | 1.374403  | -2.976972 | -0.694108 |
| 37 | 1 | 0 | 0.336834  | 3.533639  | 1.596606  |
| 38 | 1 | 0 | 0.443596  | 1.918639  | 2.238941  |
| 39 | 1 | 0 | -1.796531 | 2.221018  | 1.264754  |
| 40 | 1 | 0 | -1.131542 | 2.744867  | -0.273819 |

-----

### Truncated Cation Product

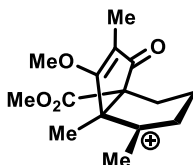

|                                              |                             |
|----------------------------------------------|-----------------------------|
| Zero-point correction=                       | 0.340050 (Hartree/Particle) |
| Thermal correction to Energy=                | 0.360328                    |
| Thermal correction to Enthalpy=              | 0.361272                    |
| Thermal correction to Gibbs Free Energy=     | 0.291975                    |
| Sum of electronic and zero-point Energies=   | -884.353028                 |
| Sum of electronic and thermal Energies=      | -884.332750                 |
| Sum of electronic and thermal Enthalpies=    | -884.331805                 |
| Sum of electronic and thermal Free Energies= | -884.401102                 |

-----

| Center Number | Atomic Number | Atomic Type | Coordinates (Angstroms) |           |           |
|---------------|---------------|-------------|-------------------------|-----------|-----------|
|               |               |             | X                       | Y         | Z         |
| 1             | 6             | 0           | 0.675714                | 0.889457  | 2.322013  |
| 2             | 6             | 0           | -0.695797               | 0.348058  | 1.933316  |
| 3             | 1             | 0           | 1.445284                | 0.119595  | 2.236902  |
| 4             | 6             | 0           | -0.728644               | -0.154542 | 0.465454  |
| 5             | 6             | 0           | 0.282467                | 0.590606  | -0.517829 |
| 6             | 6             | 0           | 0.528258                | 1.934736  | 0.028615  |
| 7             | 6             | 0           | 0.970222                | 2.082521  | 1.418786  |
| 8             | 1             | 0           | 2.055049                | 2.286825  | 1.328139  |
| 9             | 6             | 0           | 0.275662                | 3.138160  | -0.755159 |
| 10            | 1             | 0           | 0.672379                | 4.043087  | -0.295670 |
| 11            | 1             | 0           | 0.581596                | 3.039676  | -1.798812 |
| 12            | 6             | 0           | 1.517968                | -0.317713 | -0.411529 |
| 13            | 8             | 0           | 2.613275                | 0.292165  | -0.857610 |
| 14            | 6             | 0           | 1.239088                | -1.575014 | -0.000101 |
| 15            | 6             | 0           | -0.152304               | -1.589474 | 0.472054  |
| 16            | 6             | 0           | 2.035639                | -2.841626 | 0.046023  |
| 17            | 1             | 0           | 2.162403                | -3.273993 | -0.950096 |
| 18            | 1             | 0           | 3.022245                | -2.713865 | 0.491599  |
| 19            | 1             | 0           | 1.480247                | -3.566339 | 0.644914  |
| 20            | 8             | 0           | -0.744435               | -2.535198 | 0.935253  |



|    |   |   |           |           |           |
|----|---|---|-----------|-----------|-----------|
| 21 | 6 | 0 | -0.173085 | 0.567285  | -1.985182 |
| 22 | 1 | 0 | -1.026788 | 1.222638  | -2.160837 |
| 23 | 1 | 0 | 0.645448  | 0.864211  | -2.644143 |
| 24 | 6 | 0 | -2.142910 | 0.072981  | -0.069163 |
| 25 | 8 | 0 | -2.593683 | 1.199604  | -0.132322 |
| 26 | 8 | 0 | -2.763209 | -1.021996 | -0.443984 |
| 27 | 6 | 0 | -4.119051 | -0.866884 | -0.910829 |
| 28 | 1 | 0 | -4.136642 | -0.250650 | -1.809871 |
| 29 | 1 | 0 | -4.461982 | -1.875753 | -1.122641 |
| 30 | 1 | 0 | -4.726897 | -0.403483 | -0.134196 |
| 31 | 1 | 0 | 0.561847  | 3.021314  | 1.814384  |
| 32 | 1 | 0 | -0.461001 | -0.449710 | -2.256889 |
| 33 | 1 | 0 | 0.674222  | 1.219311  | 3.362806  |
| 34 | 1 | 0 | -0.996156 | -0.481033 | 2.577997  |
| 35 | 1 | 0 | -1.439272 | 1.142283  | 2.050730  |
| 36 | 6 | 0 | 3.851712  | -0.427655 | -0.964545 |
| 37 | 1 | 0 | 3.729071  | -1.310788 | -1.591268 |
| 38 | 1 | 0 | 4.546095  | 0.265515  | -1.433574 |
| 39 | 1 | 0 | 4.215519  | -0.703495 | 0.025994  |
| 40 | 1 | 0 | -0.827881 | 3.222680  | -0.777704 |

### Truncated Radical Reactant

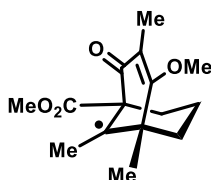

|                                              |                             |
|----------------------------------------------|-----------------------------|
| Zero-point correction=                       | 0.340679 (Hartree/Particle) |
| Thermal correction to Energy=                | 0.360612                    |
| Thermal correction to Enthalpy=              | 0.361556                    |
| Thermal correction to Gibbs Free Energy=     | 0.292312                    |
| Sum of electronic and zero-point Energies=   | -884.581147                 |
| Sum of electronic and thermal Energies=      | -884.561214                 |
| Sum of electronic and thermal Enthalpies=    | -884.560270                 |
| Sum of electronic and thermal Free Energies= | -884.629514                 |

| Center Number | Atomic Number | Atomic Type | Coordinates (Angstroms) |           |           |
|---------------|---------------|-------------|-------------------------|-----------|-----------|
|               |               |             | X                       | Y         | Z         |
| 1             | 6             | 0           | -0.438865               | -0.667988 | 2.256004  |
| 2             | 6             | 0           | 0.973598                | -0.443617 | 1.722564  |
| 3             | 1             | 0           | -0.965063               | 0.290804  | 2.324026  |
| 4             | 6             | 0           | 0.983111                | -0.087147 | 0.211448  |
| 5             | 6             | 0           | 0.246966                | -1.150098 | -0.561943 |
| 6             | 6             | 0           | -1.195907               | -1.257512 | -0.127971 |
| 7             | 6             | 0           | -1.232653               | -1.633325 | 1.382707  |
| 8             | 1             | 0           | -2.275583               | -1.688675 | 1.715020  |

|    |   |   |           |           |           |
|----|---|---|-----------|-----------|-----------|
| 9  | 6 | 0 | -1.979593 | -2.318375 | -0.909067 |
| 10 | 1 | 0 | -2.995263 | -2.404533 | -0.522578 |
| 11 | 1 | 0 | -2.043973 | -2.081333 | -1.973493 |
| 12 | 6 | 0 | -1.857188 | 0.111098  | -0.286817 |
| 13 | 8 | 0 | -3.200128 | -0.007286 | -0.357766 |
| 14 | 6 | 0 | -1.169695 | 1.284845  | -0.311719 |
| 15 | 6 | 0 | 0.256093  | 1.273231  | 0.040322  |
| 16 | 6 | 0 | -1.739718 | 2.641073  | -0.633417 |
| 17 | 1 | 0 | -2.508273 | 2.578794  | -1.404901 |
| 18 | 1 | 0 | -2.156948 | 3.157477  | 0.236407  |
| 19 | 1 | 0 | -0.929980 | 3.270364  | -1.005349 |
| 20 | 8 | 0 | 0.869540  | 2.308225  | 0.252750  |
| 21 | 6 | 0 | 0.735166  | -1.707662 | -1.855010 |
| 22 | 1 | 0 | 1.811943  | -1.886447 | -1.840217 |
| 23 | 1 | 0 | 0.241874  | -2.651365 | -2.093234 |
| 24 | 6 | 0 | 2.393194  | 0.151253  | -0.325784 |
| 25 | 8 | 0 | 2.631372  | 0.489915  | -1.461681 |
| 26 | 8 | 0 | 3.348797  | -0.061757 | 0.587974  |
| 27 | 6 | 0 | 4.682855  | 0.200496  | 0.146985  |
| 28 | 1 | 0 | 4.777975  | 1.240899  | -0.167305 |
| 29 | 1 | 0 | 5.319482  | -0.002333 | 1.006053  |
| 30 | 1 | 0 | 4.945357  | -0.450326 | -0.688797 |
| 31 | 1 | 0 | -0.813191 | -2.642833 | 1.469772  |
| 32 | 1 | 0 | 0.557355  | -1.019660 | -2.695864 |
| 33 | 1 | 0 | -0.381875 | -1.056073 | 3.278222  |
| 34 | 1 | 0 | 1.474629  | 0.351386  | 2.280503  |
| 35 | 1 | 0 | 1.566757  | -1.354415 | 1.848983  |
| 36 | 6 | 0 | -4.063238 | 0.970715  | 0.213168  |
| 37 | 1 | 0 | -4.307375 | 1.761386  | -0.497293 |
| 38 | 1 | 0 | -4.975346 | 0.436545  | 0.481485  |
| 39 | 1 | 0 | -3.614994 | 1.404659  | 1.109609  |
| 40 | 1 | 0 | -1.488904 | -3.289009 | -0.800093 |

### Truncated Radical TS1

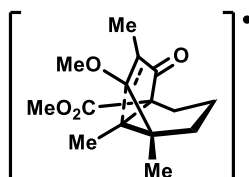

Imaginary: -357.5498 cm-1

Zero-point correction= 0.338726 (Hartree/Particle)

Thermal correction to Energy= 0.358487

Thermal correction to Enthalpy= 0.359431

Thermal correction to Gibbs Free Energy= 0.291165

Sum of electronic and zero-point Energies= -884.563439

Sum of electronic and thermal Energies= -884.543678

Sum of electronic and thermal Enthalpies= -884.542733

Sum of electronic and thermal Free Energies= -884.611000

| Center<br>Number | Atomic<br>Number | Atomic<br>Type | Coordinates (Angstroms) |           |           |
|------------------|------------------|----------------|-------------------------|-----------|-----------|
|                  |                  |                | X                       | Y         | Z         |
| 1                | 6                | 0              | 0.433652                | 1.736970  | 2.004619  |
| 2                | 6                | 0              | -0.937779               | 1.637193  | 1.349357  |
| 3                | 1                | 0              | 0.613478                | 0.847000  | 2.616161  |
| 4                | 6                | 0              | -0.950980               | 0.479365  | 0.327550  |
| 5                | 6                | 0              | 0.054263                | 0.713836  | -0.775147 |
| 6                | 6                | 0              | 1.432960                | 1.027833  | -0.295670 |
| 7                | 6                | 0              | 1.534967                | 1.904951  | 0.964338  |
| 8                | 1                | 0              | 2.522173                | 1.754707  | 1.415849  |
| 9                | 6                | 0              | 2.355512                | 1.616776  | -1.363091 |
| 10               | 1                | 0              | 3.319810                | 1.885691  | -0.924425 |
| 11               | 1                | 0              | 2.537846                | 0.936433  | -2.194254 |
| 12               | 6                | 0              | 1.522125                | -0.490625 | -0.164938 |
| 13               | 8                | 0              | 2.386562                | -1.151480 | -1.002869 |
| 14               | 6                | 0              | 0.770232                | -1.285887 | 0.711796  |
| 15               | 6                | 0              | -0.518876               | -0.793971 | 1.112700  |
| 16               | 6                | 0              | 1.182593                | -2.670007 | 1.103257  |
| 17               | 1                | 0              | 1.590722                | -3.214240 | 0.247873  |
| 18               | 1                | 0              | 1.947213                | -2.660618 | 1.889031  |
| 19               | 1                | 0              | 0.318993                | -3.207844 | 1.497385  |
| 20               | 8                | 0              | -1.240208               | -1.274517 | 1.980278  |
| 21               | 6                | 0              | -0.329914               | 0.635075  | -2.215958 |
| 22               | 1                | 0              | -0.720015               | -0.353399 | -2.477702 |
| 23               | 1                | 0              | -1.128768               | 1.357341  | -2.430904 |
| 24               | 6                | 0              | -2.366279               | 0.282869  | -0.200457 |
| 25               | 8                | 0              | -3.252205               | 1.101269  | -0.113845 |
| 26               | 8                | 0              | -2.518682               | -0.908158 | -0.792667 |
| 27               | 6                | 0              | -3.831824               | -1.193605 | -1.278423 |
| 28               | 1                | 0              | -4.128836               | -0.464297 | -2.034394 |
| 29               | 1                | 0              | -3.773947               | -2.191484 | -1.708426 |
| 30               | 1                | 0              | -4.550072               | -1.171200 | -0.457538 |
| 31               | 1                | 0              | 1.511187                | 2.941344  | 0.603489  |
| 32               | 1                | 0              | 0.502379                | 0.861663  | -2.880234 |
| 33               | 1                | 0              | 0.457549                | 2.588273  | 2.692393  |
| 34               | 1                | 0              | -1.708028               | 1.438044  | 2.097944  |
| 35               | 1                | 0              | -1.207305               | 2.568515  | 0.842304  |
| 36               | 6                | 0              | 3.756054                | -1.129756 | -0.615977 |
| 37               | 1                | 0              | 4.312953                | -1.592331 | -1.431066 |
| 38               | 1                | 0              | 4.122411                | -0.111727 | -0.459244 |
| 39               | 1                | 0              | 3.905464                | -1.710546 | 0.299776  |
| 40               | 1                | 0              | 1.910821                | 2.535657  | -1.754930 |

## Truncated Radical Intermediate

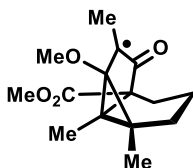

Zero-point correction= 0.340083 (Hartree/Particle)  
 Thermal correction to Energy= 0.359938  
 Thermal correction to Enthalpy= 0.360882  
 Thermal correction to Gibbs Free Energy= 0.292919  
 Sum of electronic and zero-point Energies= -884.583242  
 Sum of electronic and thermal Energies= -884.563387  
 Sum of electronic and thermal Enthalpies= -884.562442  
 Sum of electronic and thermal Free Energies= -884.630405

| Center Number | Atomic Number | Atomic Type | Coordinates (Angstroms) |           |           |
|---------------|---------------|-------------|-------------------------|-----------|-----------|
|               |               |             | X                       | Y         | Z         |
| 1             | 6             | 0           | -0.400129               | -2.276367 | 1.468160  |
| 2             | 6             | 0           | 0.909308                | -1.991219 | 0.741807  |
| 3             | 1             | 0           | -0.462481               | -1.645907 | 2.360688  |
| 4             | 6             | 0           | 0.912375                | -0.551143 | 0.207409  |
| 5             | 6             | 0           | -0.204707               | -0.319015 | -0.839347 |
| 6             | 6             | 0           | -1.526328               | -0.955082 | -0.481275 |
| 7             | 6             | 0           | -1.615879               | -2.062548 | 0.563974  |
| 8             | 1             | 0           | -2.524144               | -1.928368 | 1.163236  |
| 9             | 6             | 0           | -2.502671               | -1.224627 | -1.614841 |
| 10            | 1             | 0           | -3.474428               | -1.523394 | -1.209652 |
| 11            | 1             | 0           | -2.656065               | -0.365541 | -2.266245 |
| 12            | 6             | 0           | -1.269102               | 0.549739  | -0.160072 |
| 13            | 8             | 0           | -1.934410               | 1.496840  | -0.932907 |
| 14            | 6             | 0           | -0.746601               | 0.968277  | 1.144013  |
| 15            | 6             | 0           | 0.548724                | 0.390370  | 1.374461  |
| 16            | 6             | 0           | -1.358049               | 1.929675  | 2.090510  |
| 17            | 1             | 0           | -1.514534               | 2.905755  | 1.616564  |
| 18            | 1             | 0           | -2.334201               | 1.584719  | 2.450557  |
| 19            | 1             | 0           | -0.693733               | 2.062557  | 2.946766  |
| 20            | 8             | 0           | 1.250799                | 0.551136  | 2.370662  |
| 21            | 6             | 0           | 0.186880                | -0.105952 | -2.280873 |
| 22            | 1             | 0           | 0.651744                | -1.009114 | -2.688658 |
| 23            | 1             | 0           | -0.677014               | 0.140646  | -2.895790 |
| 24            | 6             | 0           | 2.287988                | -0.202277 | -0.338300 |
| 25            | 8             | 0           | 3.139674                | -1.006799 | -0.636709 |
| 26            | 8             | 0           | 2.447656                | 1.122570  | -0.463624 |
| 27            | 6             | 0           | 3.723060                | 1.550450  | -0.945782 |
| 28            | 1             | 0           | 3.910899                | 1.147898  | -1.942935 |
| 29            | 1             | 0           | 3.675540                | 2.637175  | -0.972749 |
| 30            | 1             | 0           | 4.512975                | 1.217493  | -0.270900 |
| 31            | 1             | 0           | -1.771788               | -2.985504 | -0.009101 |
| 32            | 1             | 0           | 0.896152                | 0.718446  | -2.374528 |

|    |   |   |           |           |           |
|----|---|---|-----------|-----------|-----------|
| 33 | 1 | 0 | -0.405456 | -3.308667 | 1.831352  |
| 34 | 1 | 0 | 1.755672  | -2.117815 | 1.420751  |
| 35 | 1 | 0 | 1.059838  | -2.681430 | -0.094675 |
| 36 | 6 | 0 | -3.292378 | 1.720313  | -0.592316 |
| 37 | 1 | 0 | -3.725247 | 2.301329  | -1.408027 |
| 38 | 1 | 0 | -3.842436 | 0.779350  | -0.489122 |
| 39 | 1 | 0 | -3.389935 | 2.291524  | 0.335847  |
| 40 | 1 | 0 | -2.136077 | -2.054691 | -2.227922 |

-----

### Truncated Radical TS2

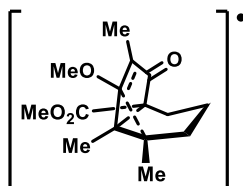

Imaginary: -491.8588 cm-1  
 Zero-point correction= 0.338711 (Hartree/Particle)  
 Thermal correction to Energy= 0.358486  
 Thermal correction to Enthalpy= 0.359431  
 Thermal correction to Gibbs Free Energy= 0.291484  
 Sum of electronic and zero-point Energies= -884.574441  
 Sum of electronic and thermal Energies= -884.554665  
 Sum of electronic and thermal Enthalpies= -884.553721  
 Sum of electronic and thermal Free Energies= -884.621668

-----

| Center Number | Atomic Number | Atomic Type | Coordinates (Angstroms) |           |           |
|---------------|---------------|-------------|-------------------------|-----------|-----------|
|               |               |             | X                       | Y         | Z         |
| 1             | 6             | 0           | 0.349891                | 2.376223  | 1.437108  |
| 2             | 6             | 0           | -0.933790               | 2.032249  | 0.694663  |
| 3             | 1             | 0           | 0.417576                | 1.759264  | 2.337488  |
| 4             | 6             | 0           | -0.879118               | 0.581956  | 0.207017  |
| 5             | 6             | 0           | 0.262851                | 0.338149  | -0.823525 |
| 6             | 6             | 0           | 1.506172                | 1.113185  | -0.512352 |
| 7             | 6             | 0           | 1.580205                | 2.179017  | 0.552014  |
| 8             | 1             | 0           | 2.481641                | 2.036920  | 1.161349  |
| 9             | 6             | 0           | 2.575784                | 1.253561  | -1.557730 |
| 10            | 1             | 0           | 3.522676                | 1.556909  | -1.100694 |
| 11            | 1             | 0           | 2.742844                | 0.340372  | -2.128028 |
| 12            | 6             | 0           | 1.117052                | -0.726033 | -0.183214 |
| 13            | 8             | 0           | 1.901115                | -1.481539 | -0.995272 |
| 14            | 6             | 0           | 0.694235                | -1.051455 | 1.119497  |
| 15            | 6             | 0           | -0.520987               | -0.336462 | 1.399859  |
| 16            | 6             | 0           | 1.258615                | -2.025548 | 2.094748  |
| 17            | 1             | 0           | 1.241223                | -3.051379 | 1.709987  |
| 18            | 1             | 0           | 2.291432                | -1.792863 | 2.374233  |
| 19            | 1             | 0           | 0.644716                | -1.997433 | 2.997900  |

|    |   |   |           |           |           |
|----|---|---|-----------|-----------|-----------|
| 20 | 8 | 0 | -1.196502 | -0.395088 | 2.422993  |
| 21 | 6 | 0 | -0.141160 | 0.186507  | -2.279240 |
| 22 | 1 | 0 | -0.627699 | 1.100455  | -2.631280 |
| 23 | 1 | 0 | 0.723870  | -0.007431 | -2.912383 |
| 24 | 6 | 0 | -2.232317 | 0.177192  | -0.358479 |
| 25 | 8 | 0 | -3.105925 | 0.947938  | -0.682045 |
| 26 | 8 | 0 | -2.346700 | -1.154065 | -0.467764 |
| 27 | 6 | 0 | -3.600303 | -1.628919 | -0.962723 |
| 28 | 1 | 0 | -3.785700 | -1.247404 | -1.968652 |
| 29 | 1 | 0 | -3.518450 | -2.713930 | -0.972341 |
| 30 | 1 | 0 | -4.410770 | -1.311163 | -0.305106 |
| 31 | 1 | 0 | 1.759707  | 3.113356  | -0.002819 |
| 32 | 1 | 0 | -0.832302 | -0.648270 | -2.405223 |
| 33 | 1 | 0 | 0.318080  | 3.414197  | 1.781610  |
| 34 | 1 | 0 | -1.796881 | 2.146860  | 1.353567  |
| 35 | 1 | 0 | -1.091418 | 2.696479  | -0.162010 |
| 36 | 6 | 0 | 3.155153  | -1.916516 | -0.486131 |
| 37 | 1 | 0 | 3.721802  | -2.279075 | -1.344117 |
| 38 | 1 | 0 | 3.691669  | -1.085048 | -0.017693 |
| 39 | 1 | 0 | 3.038968  | -2.728923 | 0.233847  |
| 40 | 1 | 0 | 2.297414  | 2.041503  | -2.272005 |

### Truncated Radical Product

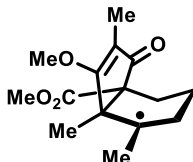

|                                              |                             |
|----------------------------------------------|-----------------------------|
| Zero-point correction=                       | 0.339699 (Hartree/Particle) |
| Thermal correction to Energy=                | 0.360260                    |
| Thermal correction to Enthalpy=              | 0.361204                    |
| Thermal correction to Gibbs Free Energy=     | 0.289466                    |
| Sum of electronic and zero-point Energies=   | -884.592232                 |
| Sum of electronic and thermal Energies=      | -884.571671                 |
| Sum of electronic and thermal Enthalpies=    | -884.570727                 |
| Sum of electronic and thermal Free Energies= | -884.642465                 |

| Center Number | Atomic Number | Atomic Type | Coordinates (Angstroms) |          |           |
|---------------|---------------|-------------|-------------------------|----------|-----------|
|               |               |             | X                       | Y        | Z         |
| 1             | 6             | 0           | 0.583631                | 1.376765 | 2.286693  |
| 2             | 6             | 0           | -0.806892               | 1.240286 | 1.686115  |
| 3             | 1             | 0           | 0.974359                | 0.388695 | 2.552523  |
| 4             | 6             | 0           | -0.797929               | 0.290701 | 0.476685  |
| 5             | 6             | 0           | 0.386084                | 0.576727 | -0.531071 |
| 6             | 6             | 0           | 1.188509                | 1.801872 | -0.142414 |
| 7             | 6             | 0           | 1.510797                | 2.079465 | 1.293436  |
| 8             | 1             | 0           | 2.565038                | 1.830163 | 1.505443  |

|    |   |   |           |           |           |
|----|---|---|-----------|-----------|-----------|
| 9  | 6 | 0 | 1.941350  | 2.587549  | -1.165380 |
| 10 | 1 | 0 | 2.368964  | 3.487146  | -0.713877 |
| 11 | 1 | 0 | 2.774742  | 2.011304  | -1.594323 |
| 12 | 6 | 0 | 1.233492  | -0.686535 | -0.379279 |
| 13 | 8 | 0 | 2.352112  | -0.646293 | -1.107977 |
| 14 | 6 | 0 | 0.724282  | -1.646777 | 0.435251  |
| 15 | 6 | 0 | -0.525091 | -1.133058 | 0.986153  |
| 16 | 6 | 0 | 1.180976  | -3.017852 | 0.836405  |
| 17 | 1 | 0 | 1.122961  | -3.734528 | 0.012318  |
| 18 | 1 | 0 | 2.197069  | -3.037351 | 1.234613  |
| 19 | 1 | 0 | 0.505760  | -3.369122 | 1.620326  |
| 20 | 8 | 0 | -1.238119 | -1.704208 | 1.794101  |
| 21 | 6 | 0 | -0.070256 | 0.658135  | -1.999847 |
| 22 | 1 | 0 | -0.710233 | 1.530326  | -2.156162 |
| 23 | 1 | 0 | 0.792875  | 0.739349  | -2.661391 |
| 24 | 6 | 0 | -2.162234 | 0.370982  | -0.197117 |
| 25 | 8 | 0 | -2.860005 | 1.359270  | -0.219069 |
| 26 | 8 | 0 | -2.509679 | -0.781047 | -0.786682 |
| 27 | 6 | 0 | -3.791317 | -0.791724 | -1.417593 |
| 28 | 1 | 0 | -3.827980 | -0.059110 | -2.226152 |
| 29 | 1 | 0 | -3.917021 | -1.800265 | -1.806379 |
| 30 | 1 | 0 | -4.572036 | -0.560891 | -0.691357 |
| 31 | 1 | 0 | 1.446265  | 3.167148  | 1.442672  |
| 32 | 1 | 0 | -0.624800 | -0.238768 | -2.280577 |
| 33 | 1 | 0 | 0.535515  | 1.946189  | 3.219353  |
| 34 | 1 | 0 | -1.516201 | 0.840165  | 2.415908  |
| 35 | 1 | 0 | -1.182373 | 2.215253  | 1.361932  |
| 36 | 6 | 0 | 3.275697  | -1.727054 | -1.073391 |
| 37 | 1 | 0 | 2.798915  | -2.663436 | -1.367722 |
| 38 | 1 | 0 | 4.052226  | -1.471918 | -1.793103 |
| 39 | 1 | 0 | 3.719538  | -1.826519 | -0.080663 |
| 40 | 1 | 0 | 1.315345  | 2.907505  | -2.004247 |

---

## Computational References

- <sup>1</sup> Gaussian 09, Revision D.01, M. J. Frisch, G. W. Trucks, H. B. Schlegel, G. E. Scuseria, M. A. Robb, J. R. Cheeseman, G. Scalmani, V. Barone, B. Mennucci, G. A. Petersson, H. Nakatsuji, M. Caricato, X. Li, H. P. Hratchian, A. F. Izmaylov, J. Bloino, G. Zheng, J. L. Sonnenberg, M. Hada, M. Ehara, K. Toyota, R. Fukuda, J. Hasegawa, M. Ishida, T. Nakajima, Y. Honda, O. Kitao, H. Nakai, T. Vreven, J. A. Montgomery, Jr., J. E. Peralta, F. Ogliaro, M. Bearpark, J. J. Heyd, E. Brothers, K. N. Kudin, V. N. Staroverov, T. Keith, R. Kobayashi, J. Normand, K. Raghavachari, A. Rendell, J. C. Burant, S. S. Iyengar, J. Tomasi, M. Cossi, N. Rega, J. M. Millam, M. Klene, J. E. Knox, J. B. Cross, V. Bakken, C. Adamo, J. Jaramillo, R. Gomperts, R. E. Stratmann, O. Yazyev, A. J. Austin, R. Cammi, C. Pomelli, J. W. Ochterski, R. L. Martin, K. Morokuma, V. G. Zakrzewski, G. A. Voth, P. Salvador, J. J. Dannenberg, S. Dapprich, A. D. Daniels, O. Farkas, J. B. Foresman, J. V. Ortiz, J. Cioslowski, and D. J. Fox, Gaussian, Inc., Wallingford CT, 2013.
- <sup>2</sup> This work was supported by the HPC facilities operated by, and the staff of, the Yale Center for Research Computing. We gratefully acknowledge the National Science Foundation for financial support in the establishment of the Yale University High Performance Computing (HPC) Center (CNS 08-21132).
- <sup>3</sup> For systematic evaluation and recommendation of using B3LYP geometries and mPW1PW91 single point energies, see: S. P. T. Matsuda, W. K. Wilson, Q. Xiong, *Org. Biomol. Chem.* **2006**, *4*, 530.
- <sup>4</sup> NBO 6.0. E. D. Glendening, J. K. Badenhoop, A. E. Reed, J. E. Carpenter, J. A. Bohmann, C. M. Morales, C. R. Landis, and F. Weinhold, Theoretical Chemistry Institute, University of Wisconsin, Madison (2013).



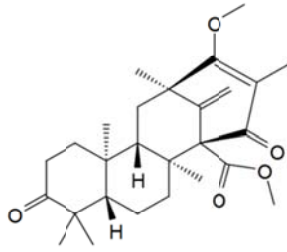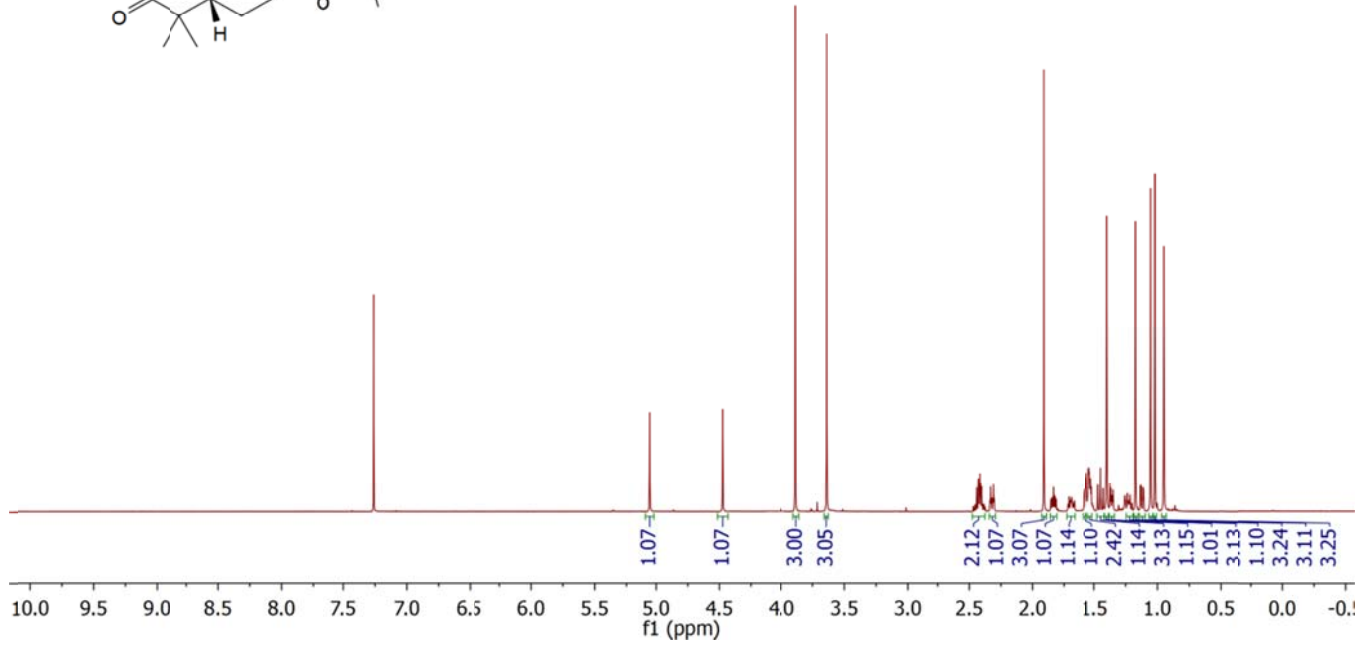

- 217.30
- 197.14
- 175.20
- 170.61
- 149.14
- 120.93
- 108.01
- 77.37
- 77.16
- 76.95
- 73.24
- 61.93
- 54.39
- 51.55
- 50.88
- 47.34
- 45.17
- 42.75
- 39.45
- 37.19
- 33.95
- 33.87
- 31.98
- 27.01
- 21.20
- 21.03
- 19.95
- 17.23
- 15.79
- 10.43

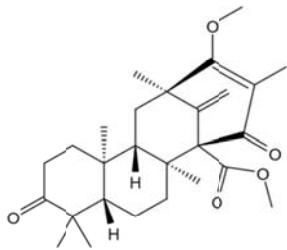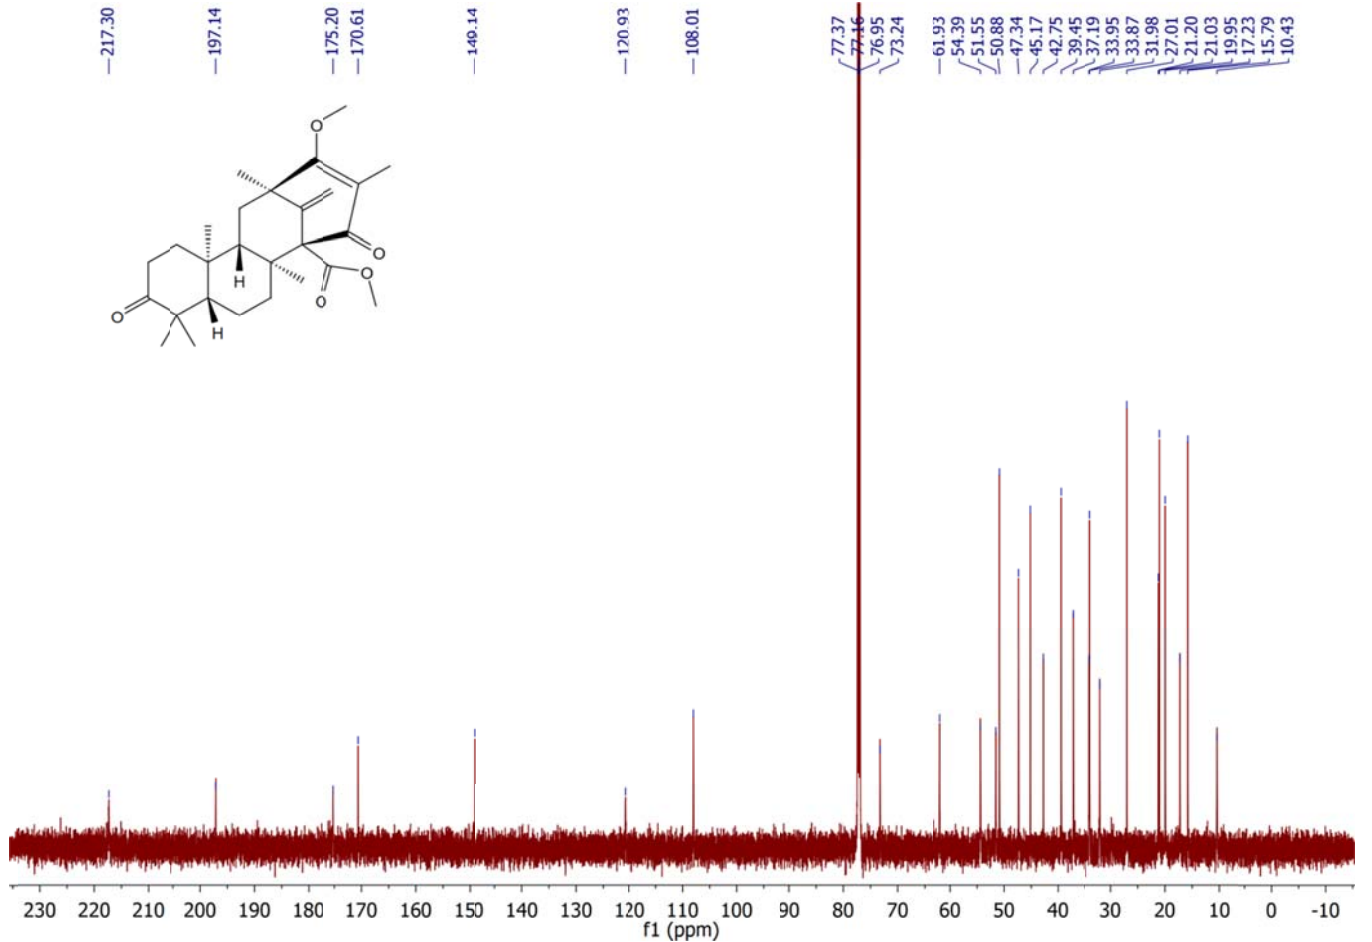

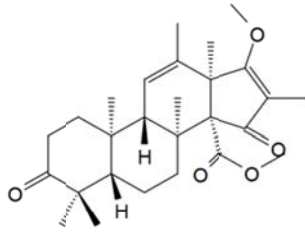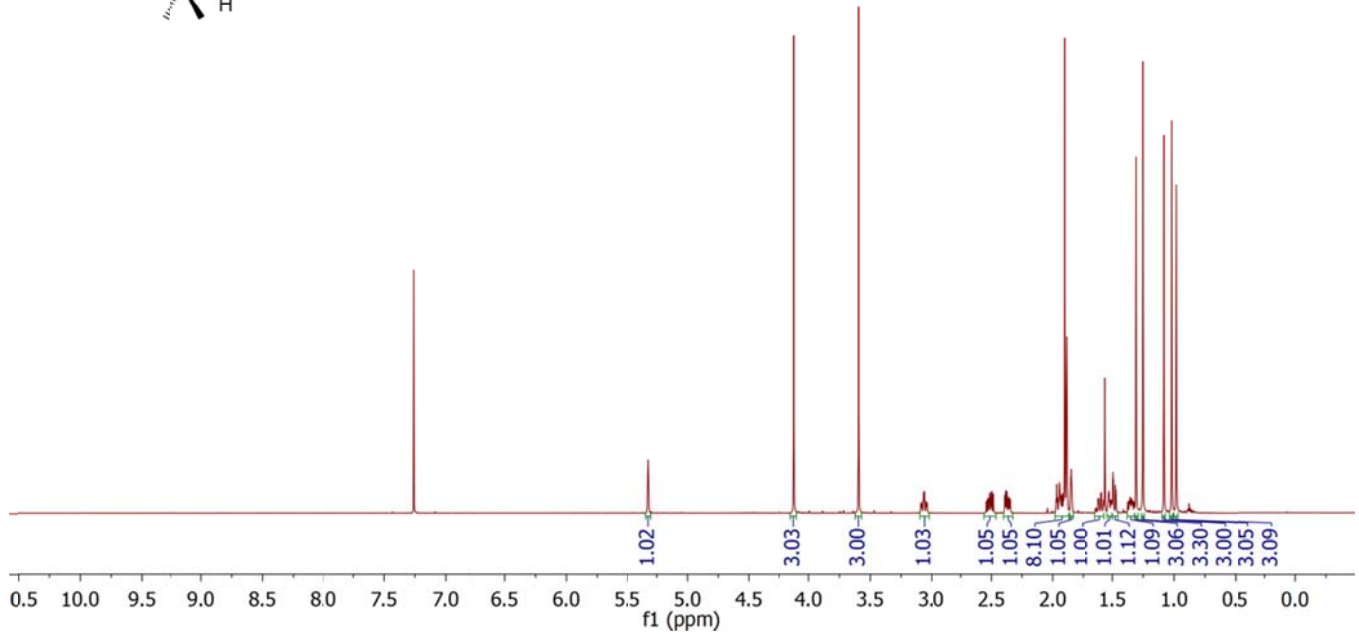

- 217.50
- 204.52
- 184.40
- 170.57
- 138.28
- 124.97
- 110.60
- 77.37
- 77.16
- 76.95
- 69.79
- 59.49
- 53.49
- 52.84
- 51.86
- 51.74
- 47.57
- 42.89
- 38.57
- 36.60
- 33.96
- 31.71
- 26.33
- 21.24
- 21.02
- 19.01
- 17.50
- 16.78
- 16.58
- 8.75

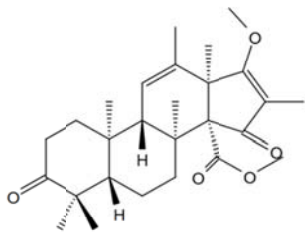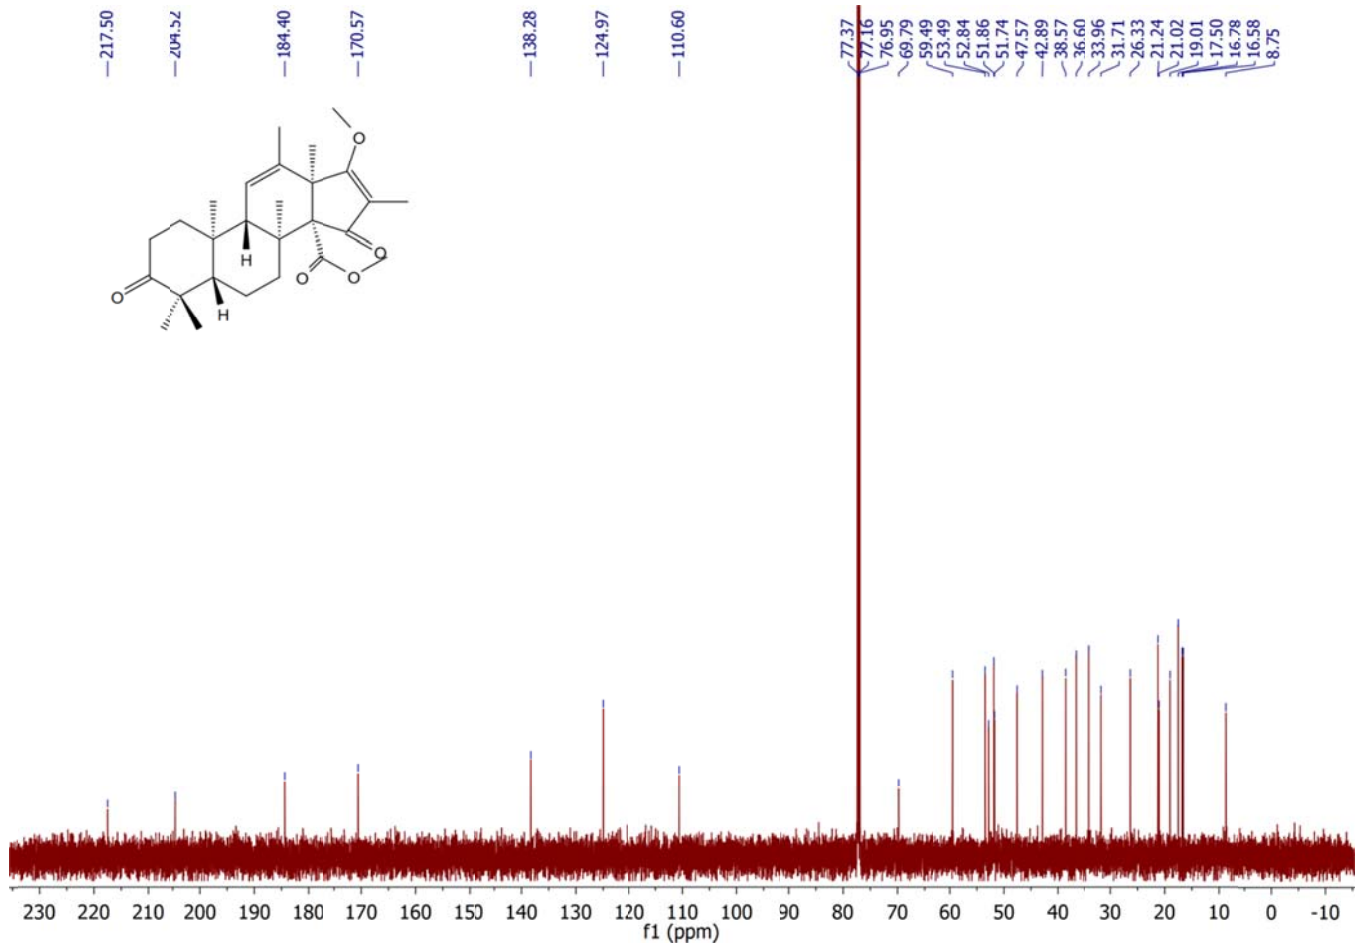

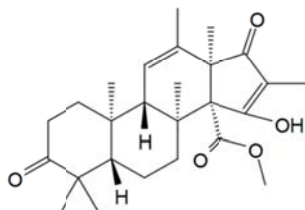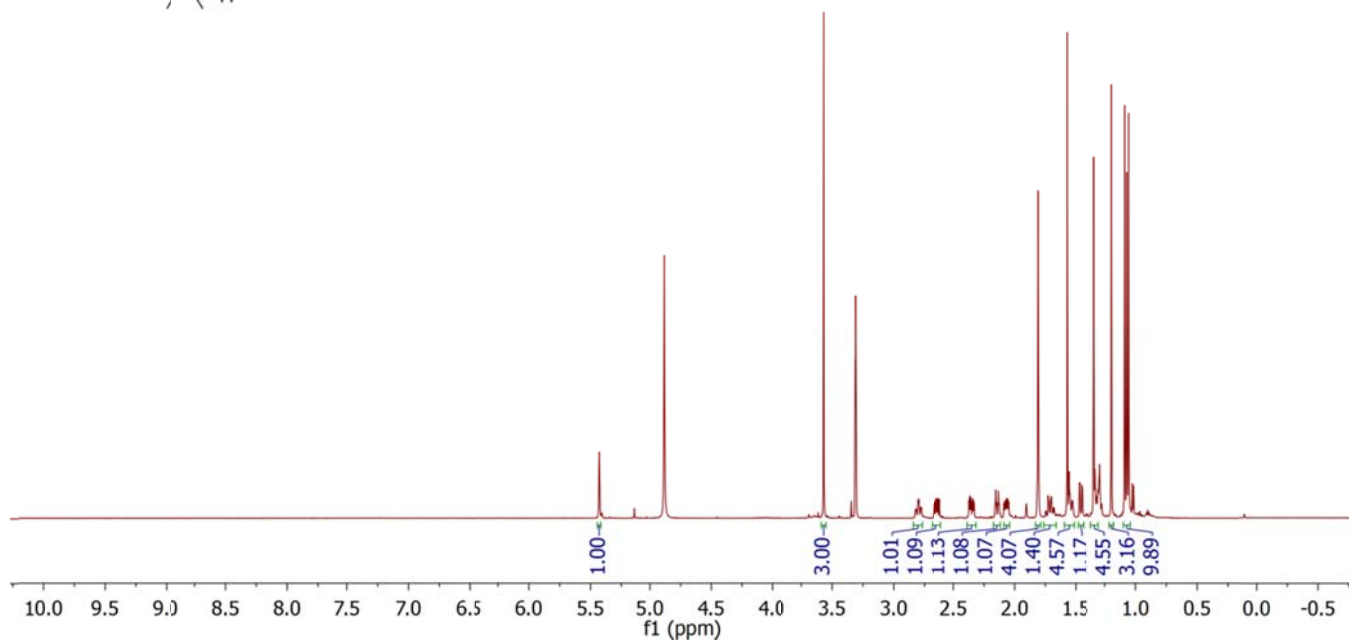

- 219.71
- 172.05
- 137.04
- 125.65
- 114.50
- 68.99
- 58.08
- 55.64
- 54.02
- 52.01
- 46.57
- 43.16
- 39.92
- 37.74
- 34.88
- 33.64
- 26.57
- 21.56
- 20.18
- 19.87
- 18.03
- 16.73
- 16.21
- 6.32

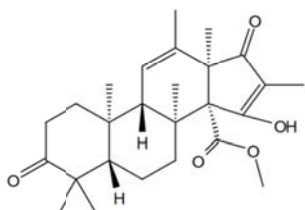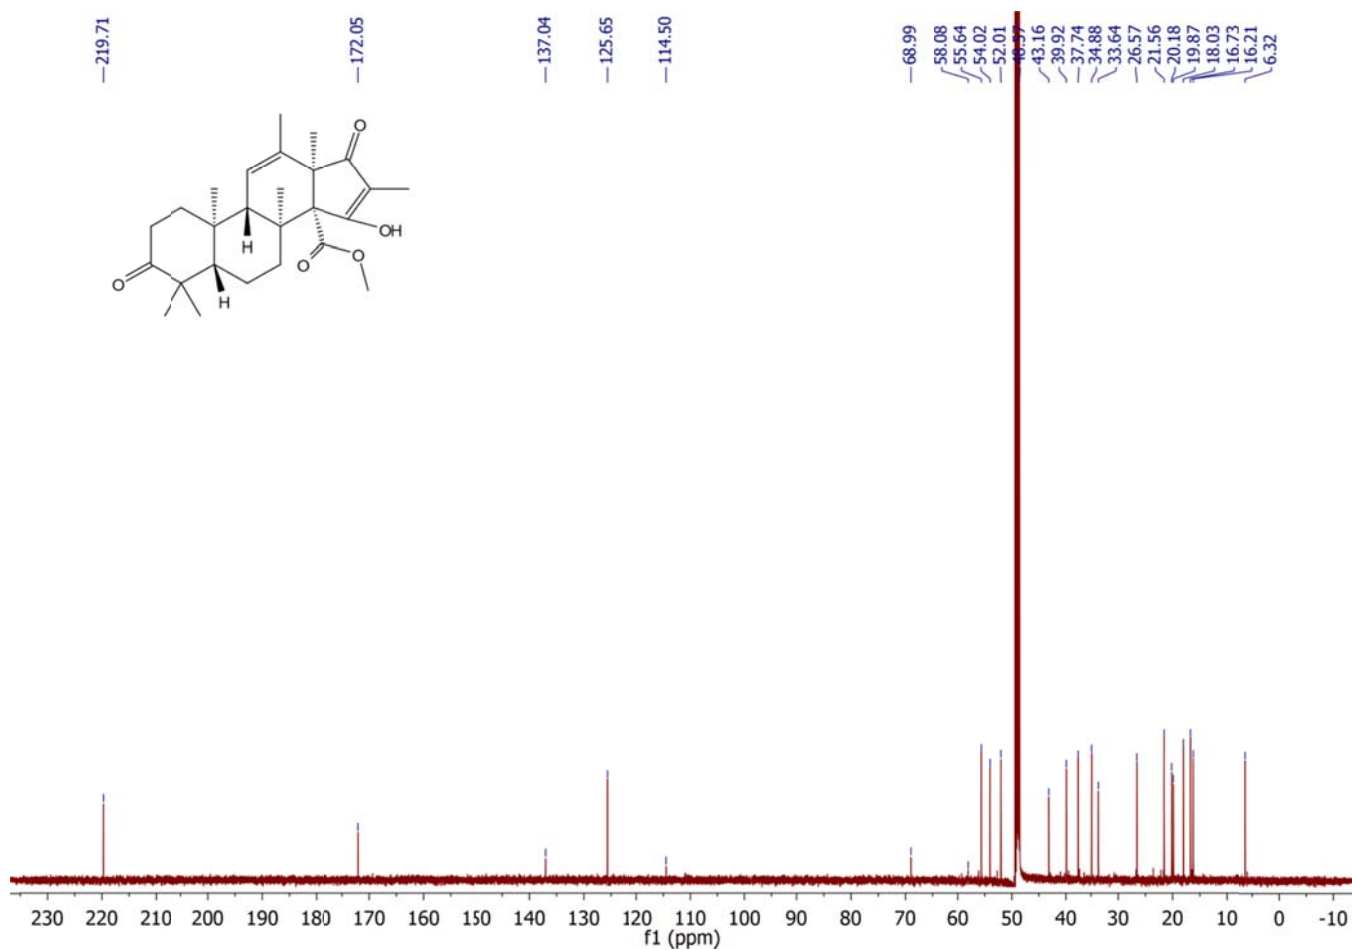

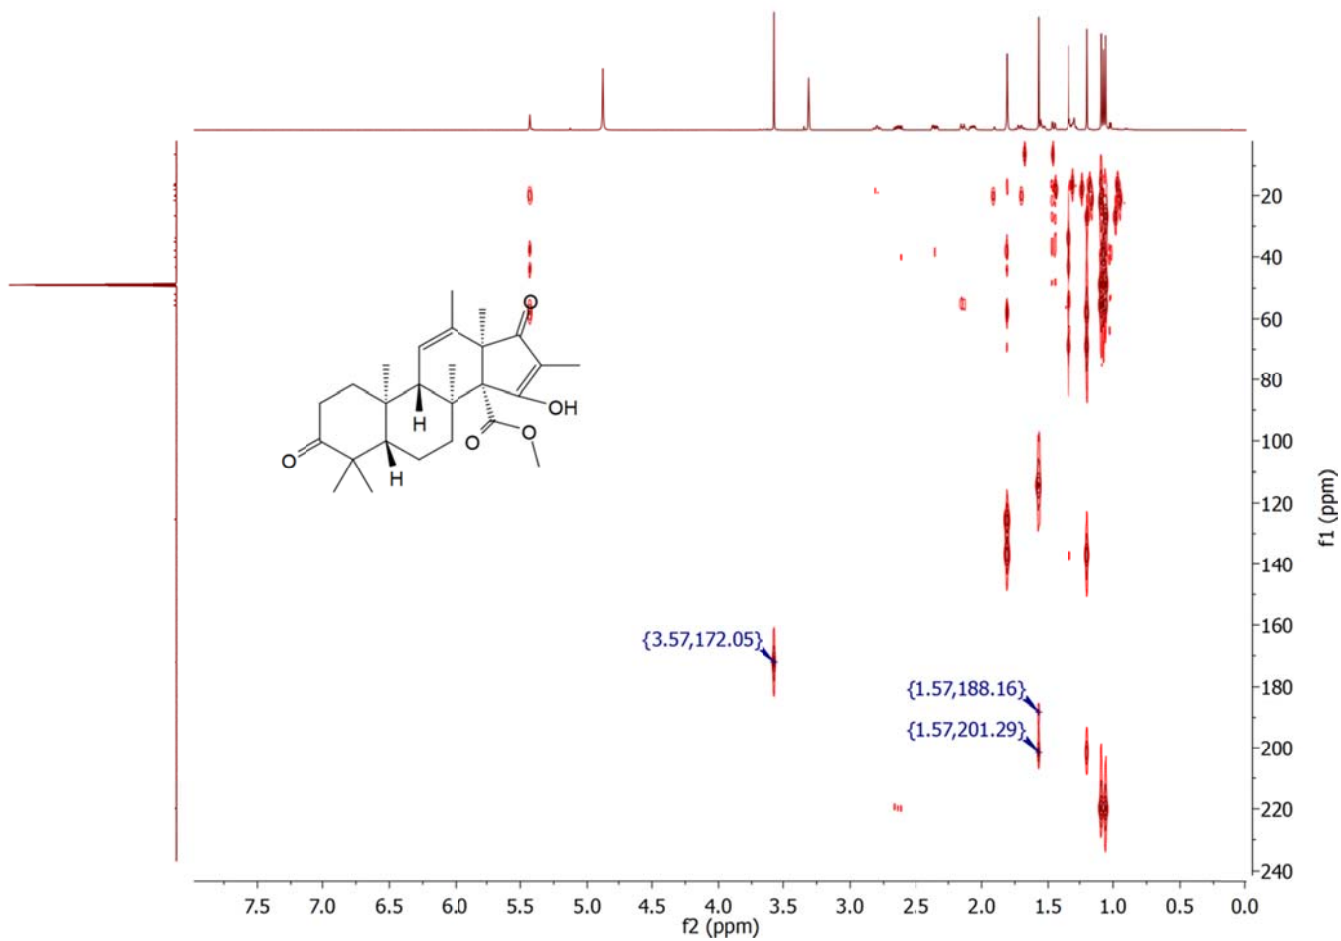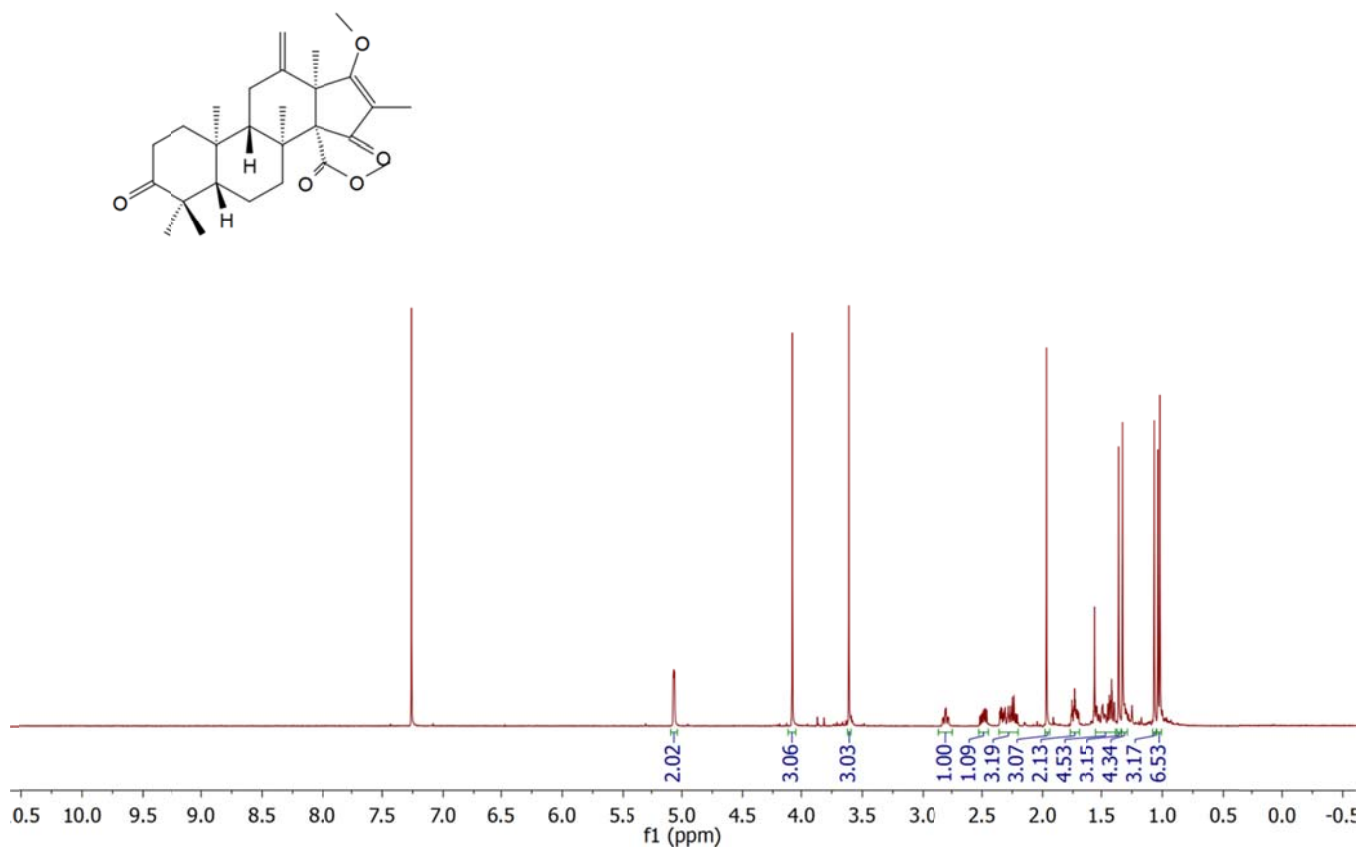

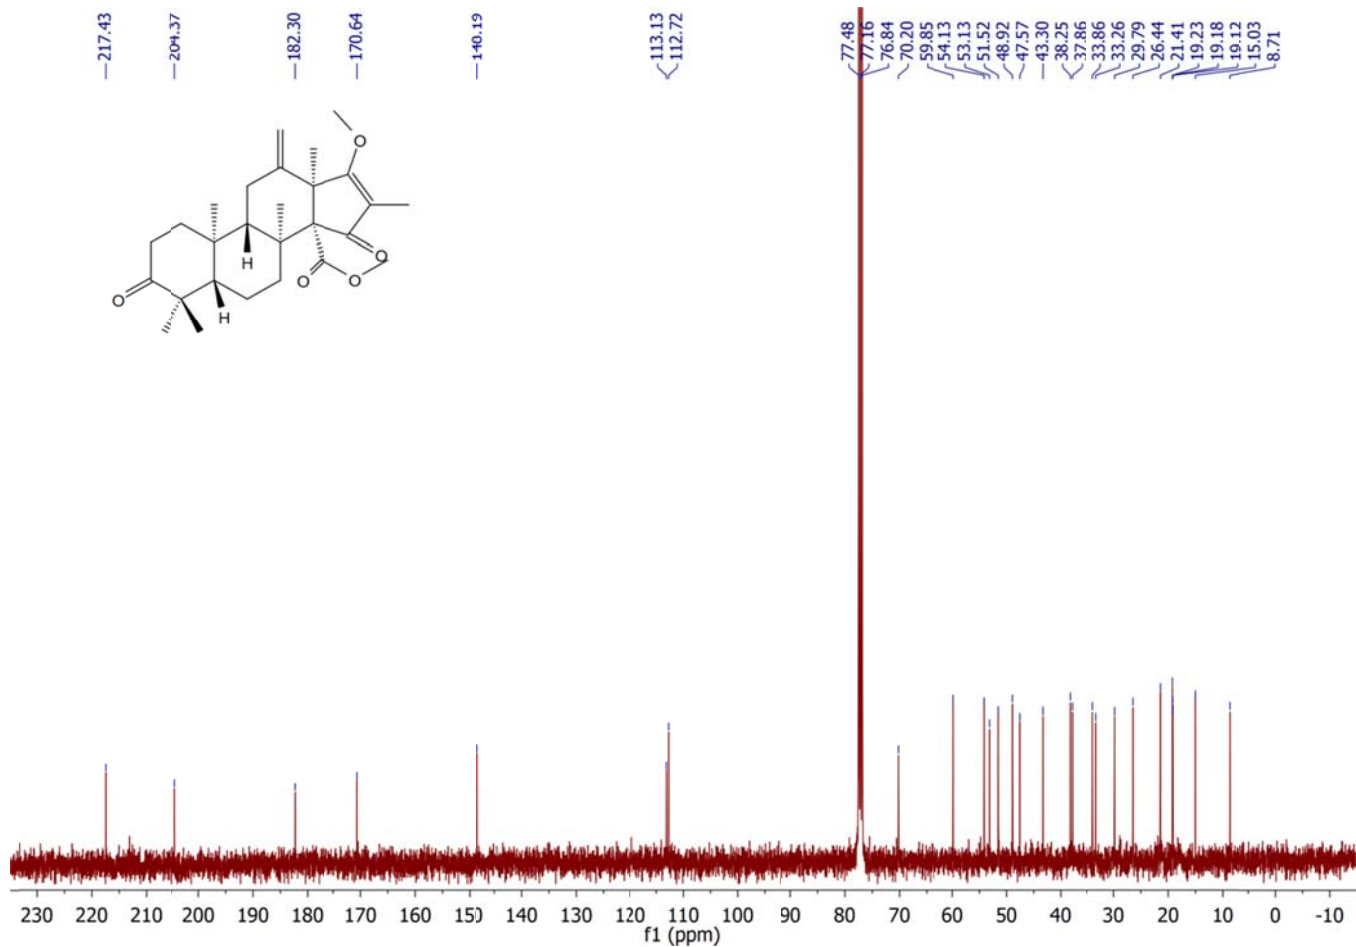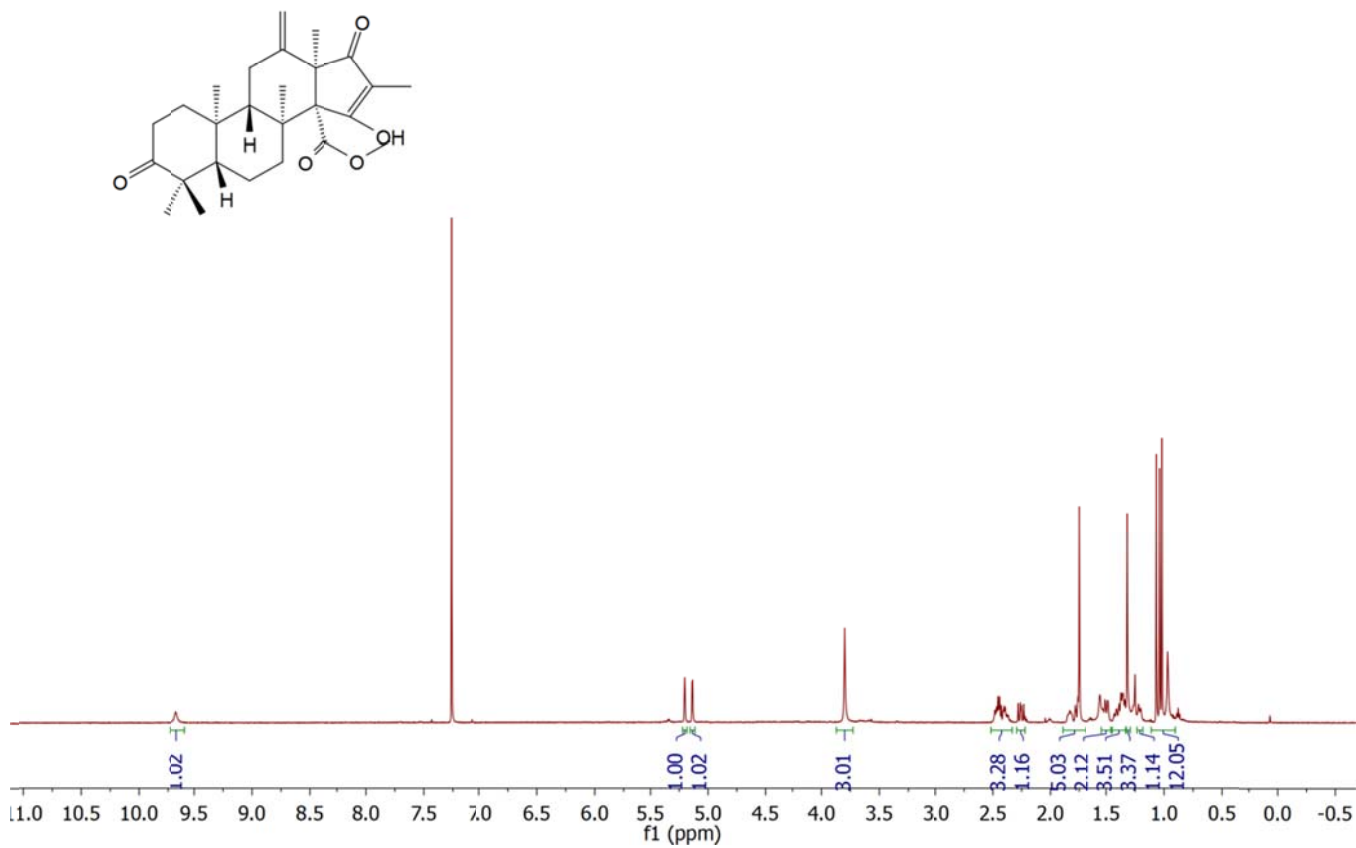

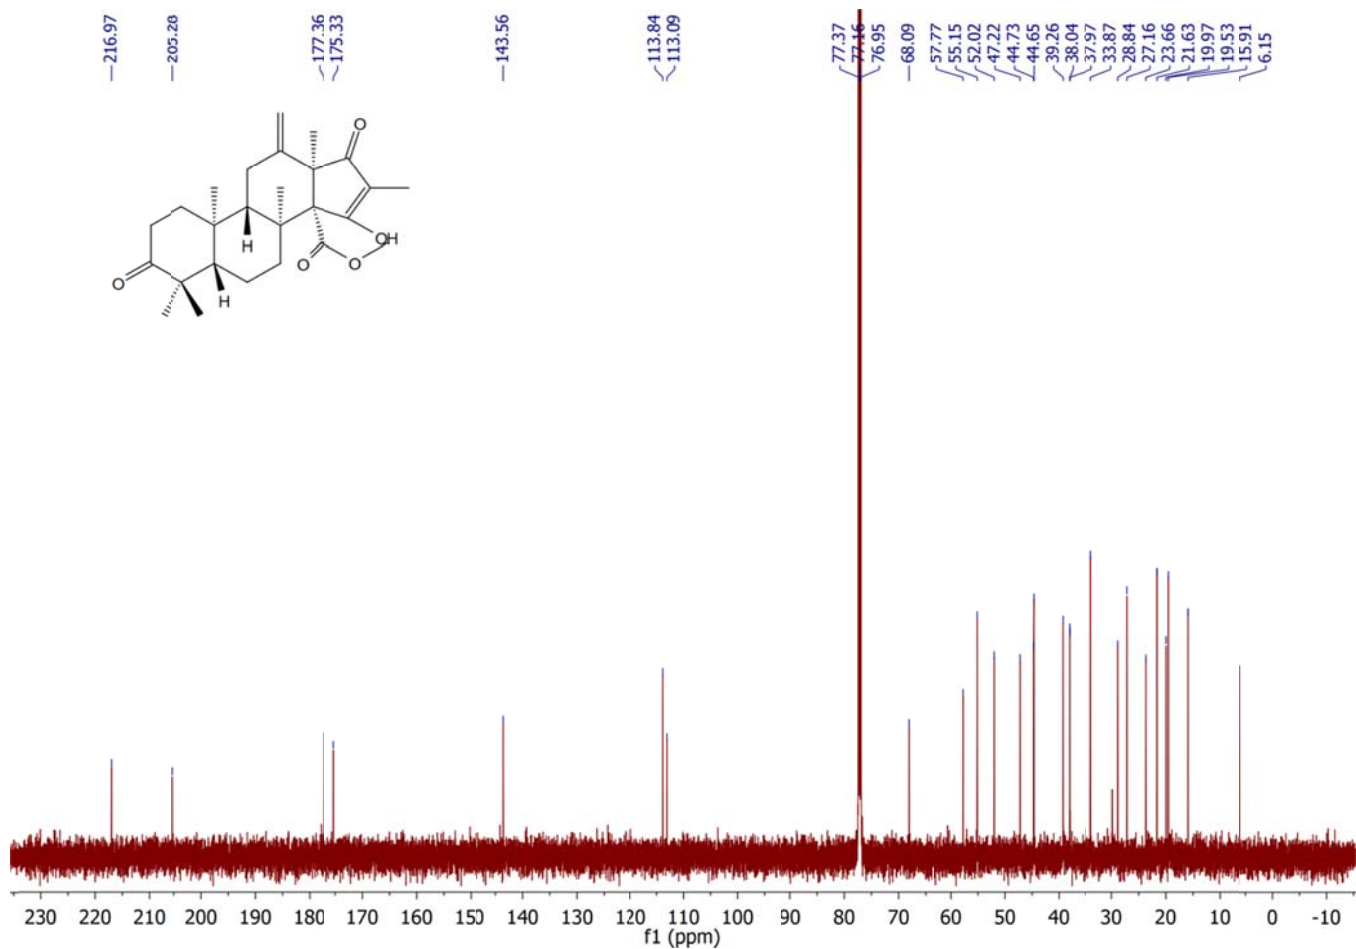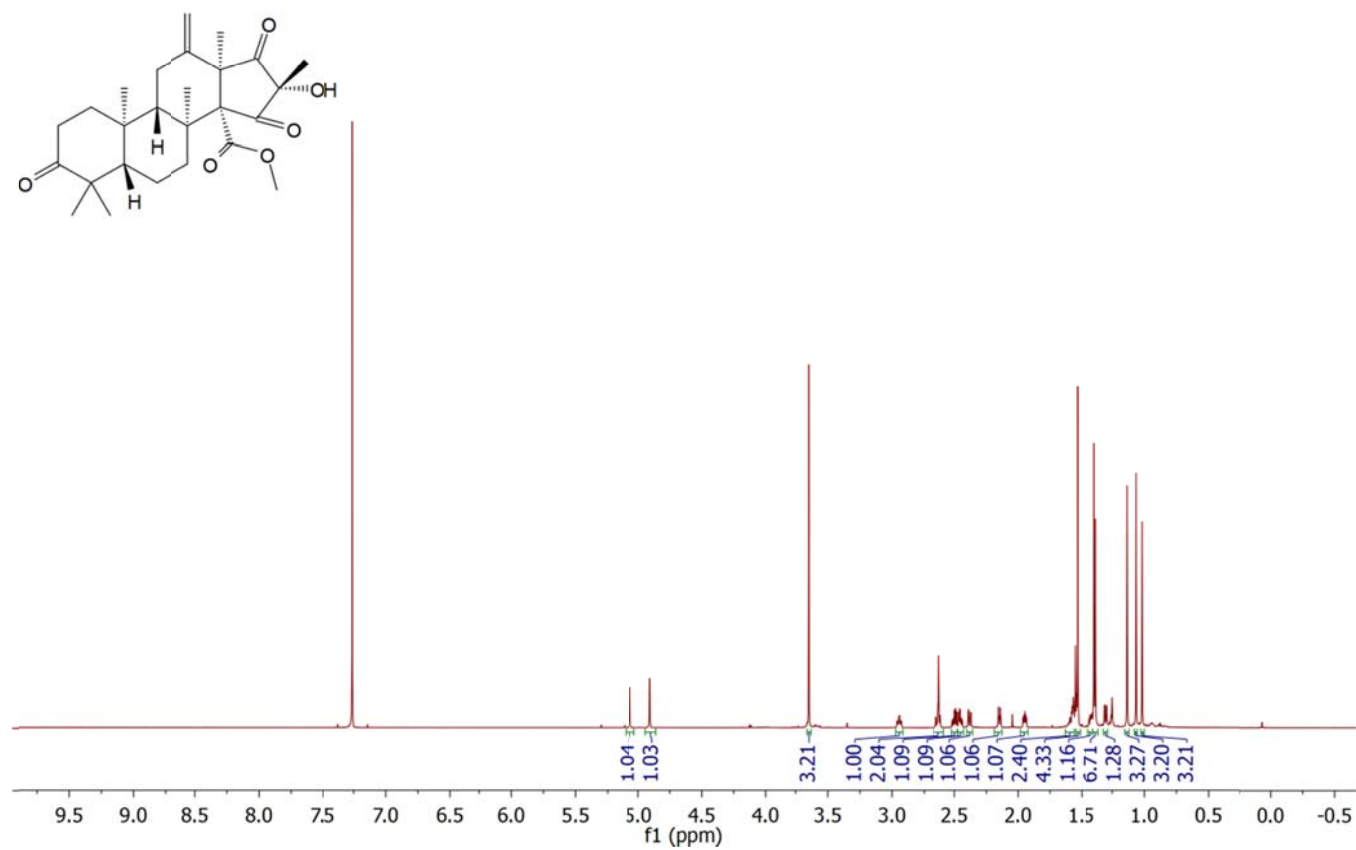

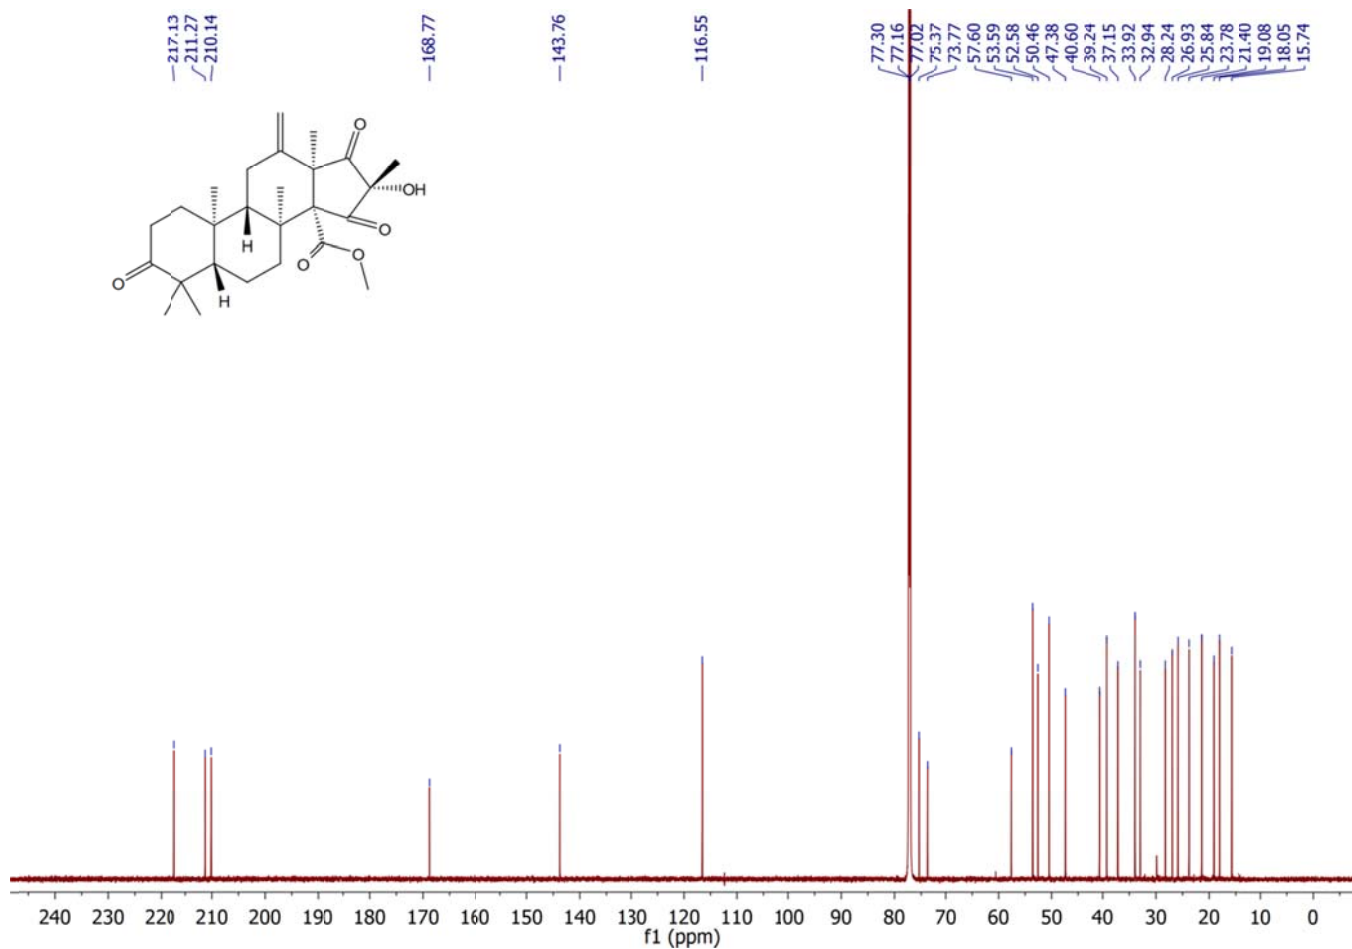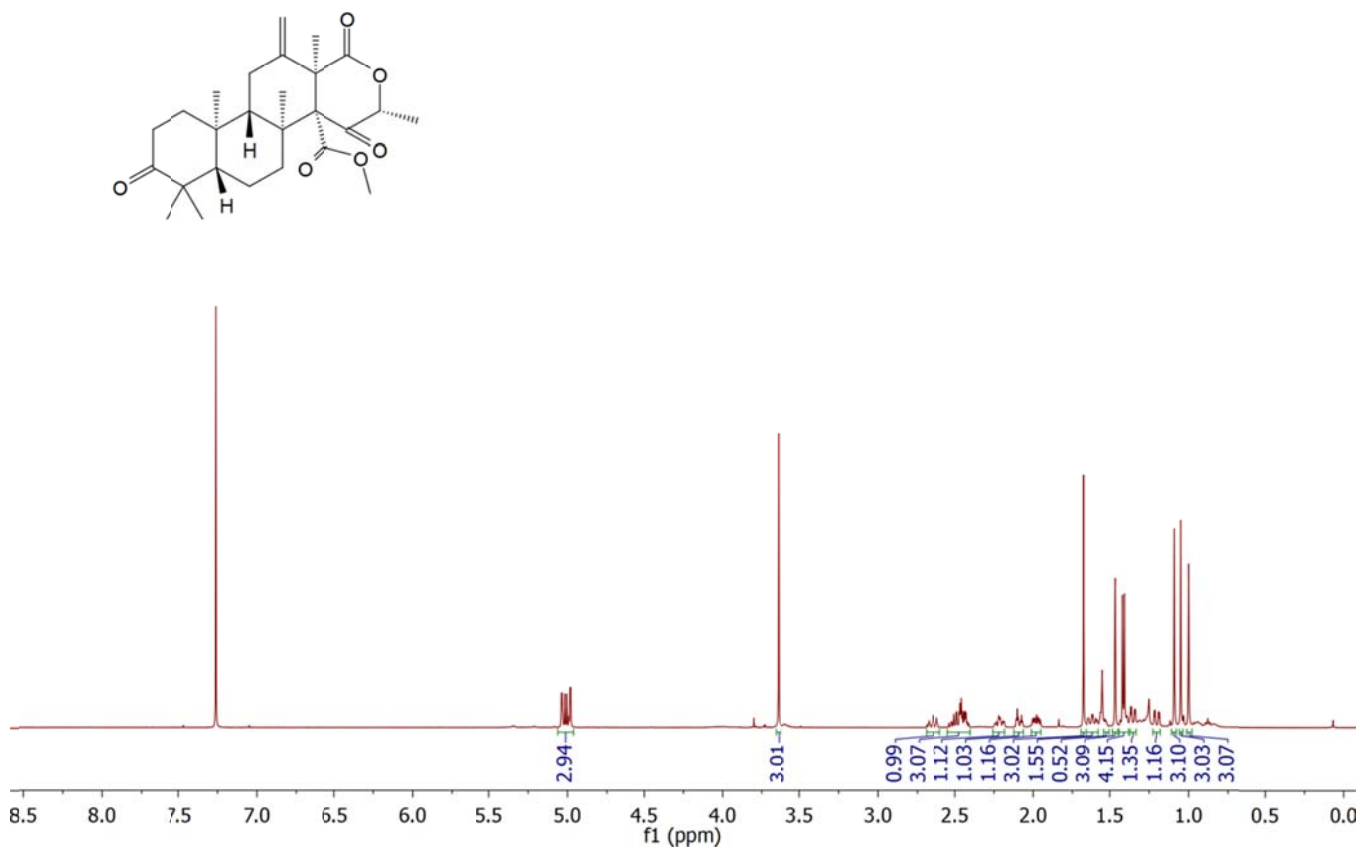

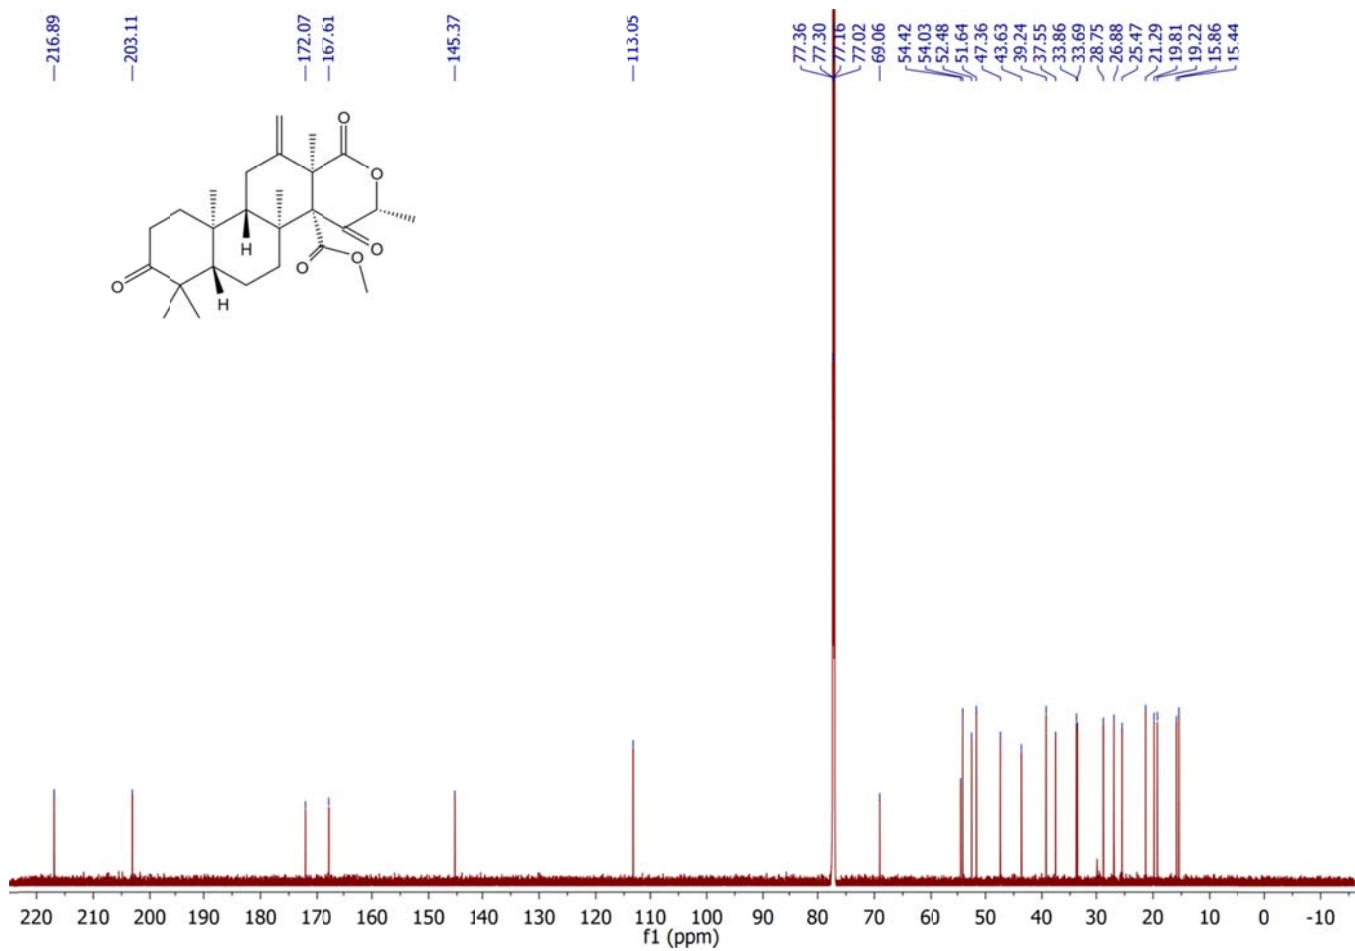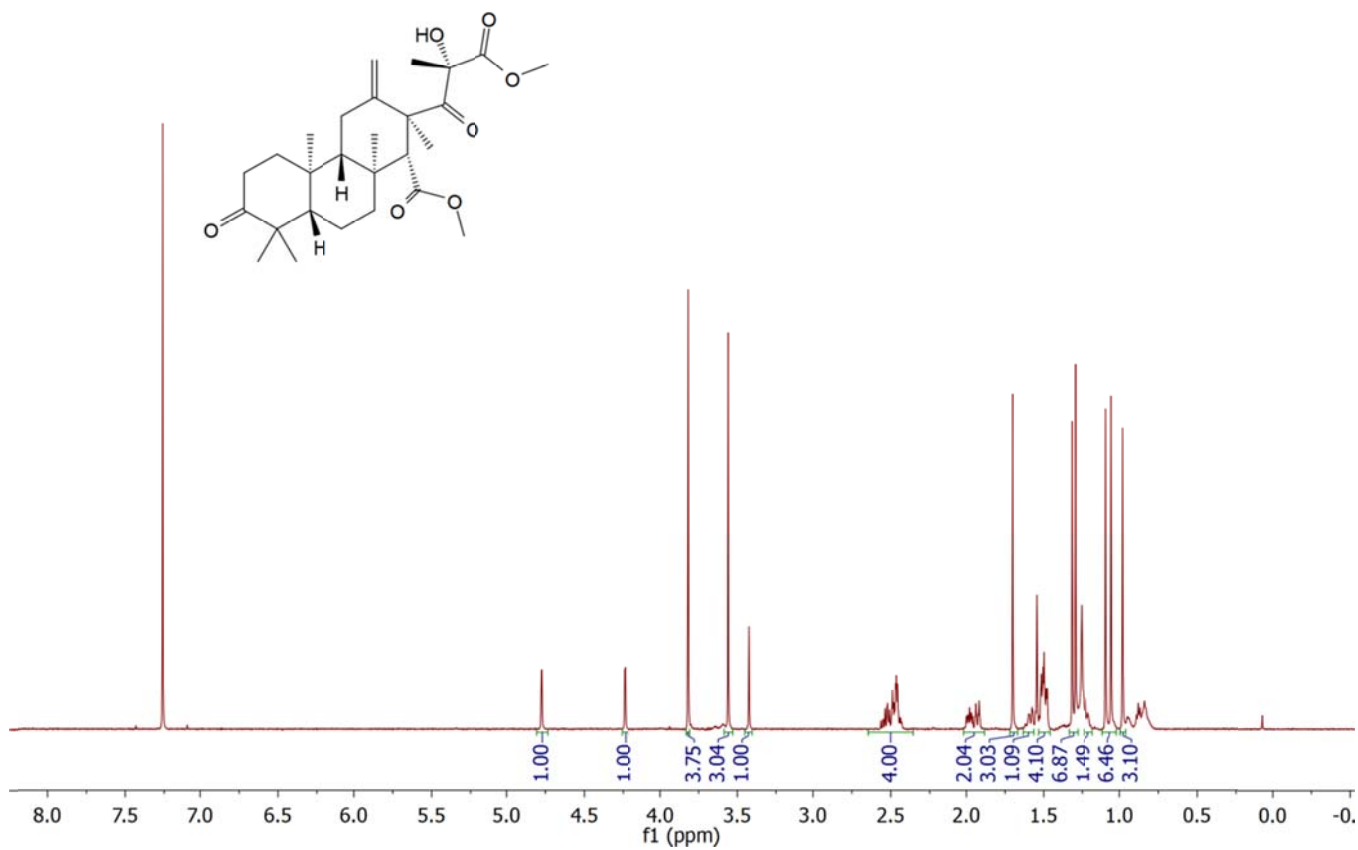



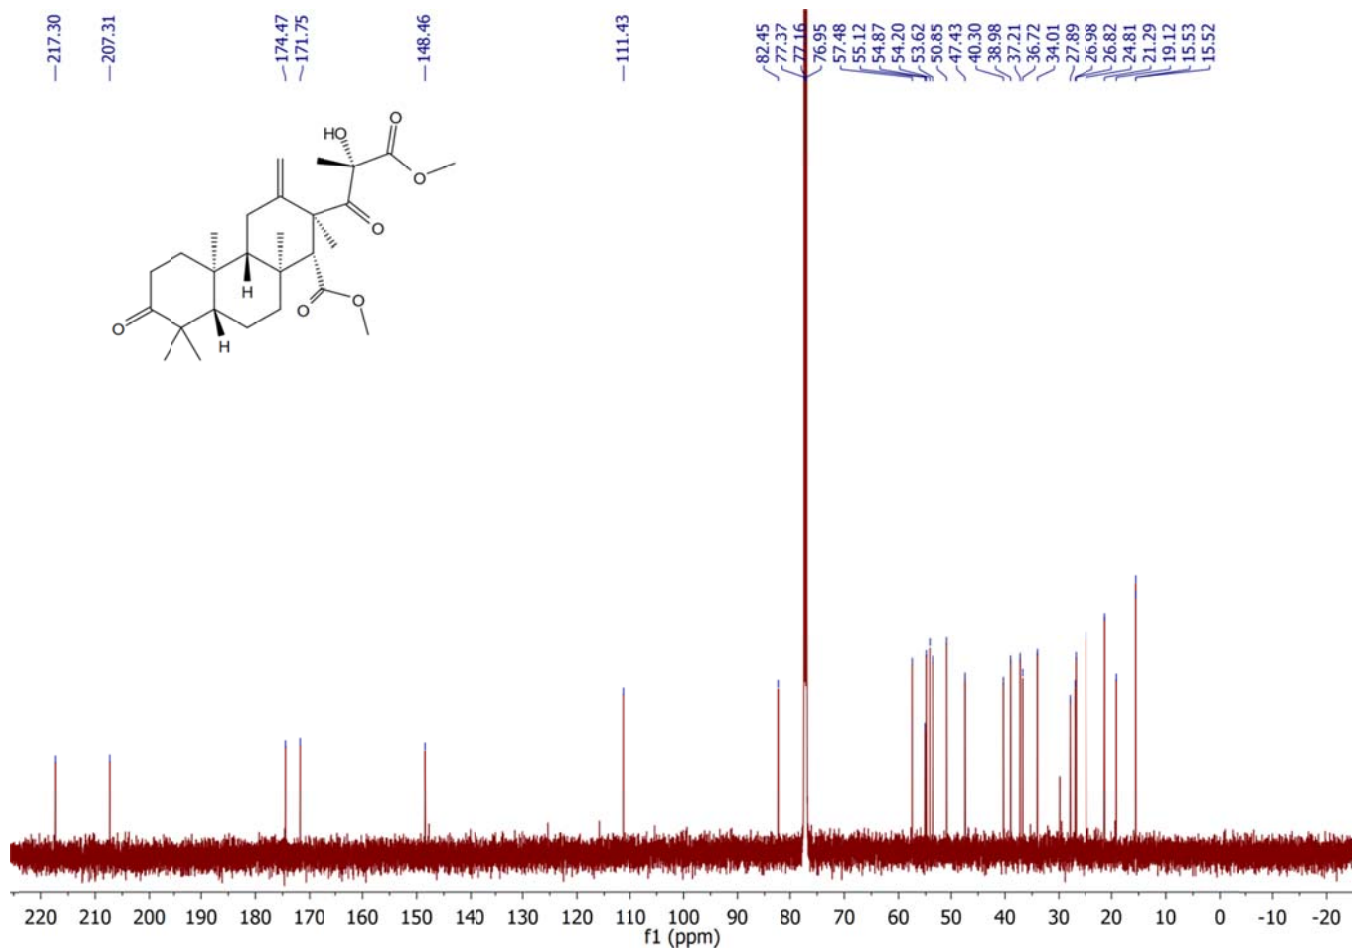

Supplement: NIHMS915633-supplement-Supporting_Information.pdf [file NIHMS915633-supplement-Supporting_Information.pdf]
